# Supplementary material for: CdbA is a DNA-binding protein and c-di-GMP receptor important for nucleoid organization and segregation in Myxococcus xanthus
Source: Springer Nature journal article supplement (doi:10.1038/s41467-020-15628-8), 2020-04-14
Supplement: MOESM1 [file 41467_2020_15628_MOESM1_ESM-1.pdf]

## **Supplementary Information for:**

### **CdbA is a DNA-binding protein and c-di-GMP receptor important for nucleoid organization and segregation in *Myxococcus xanthus***

Dorota Skotnicka, Wieland Steinchen, Dobromir Szadkowski, Ian T. Cadby,  
Andrew L. Lovering, Gert Bange and Lotte Søgaard-Andersen

#### **This file includes:**

Supplementary Figures 1-8

Supplementary Tables 1-4

Supplementary References

# Supplementary Figures

**a**

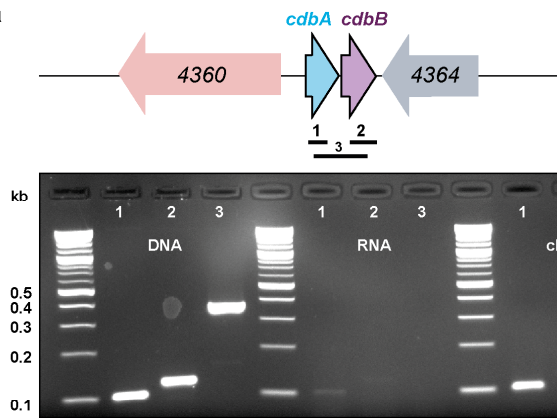

**b**

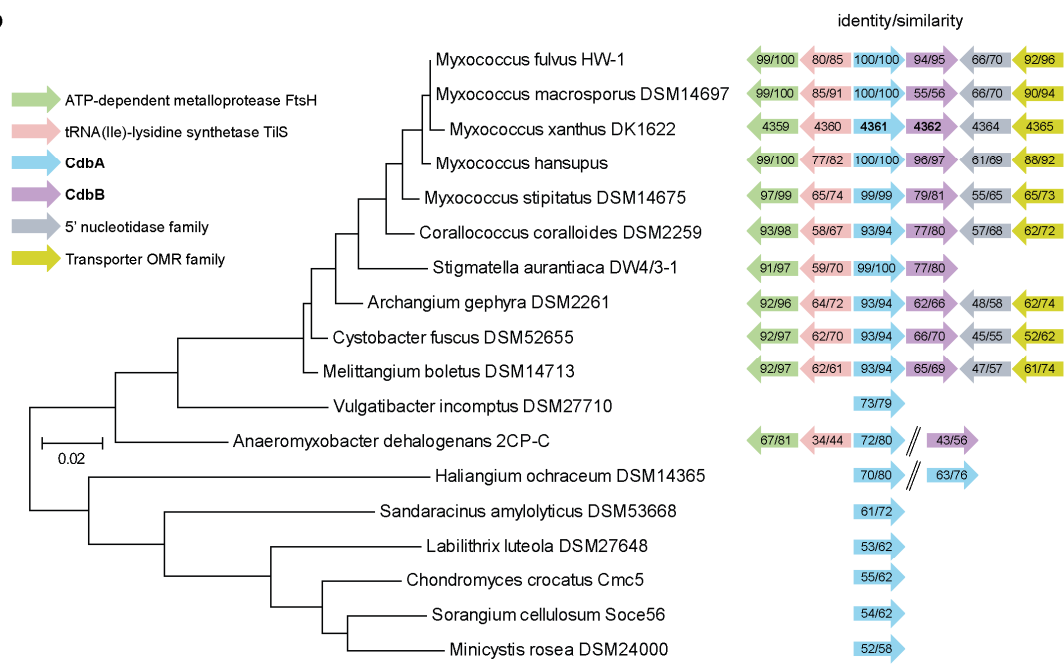

**c**

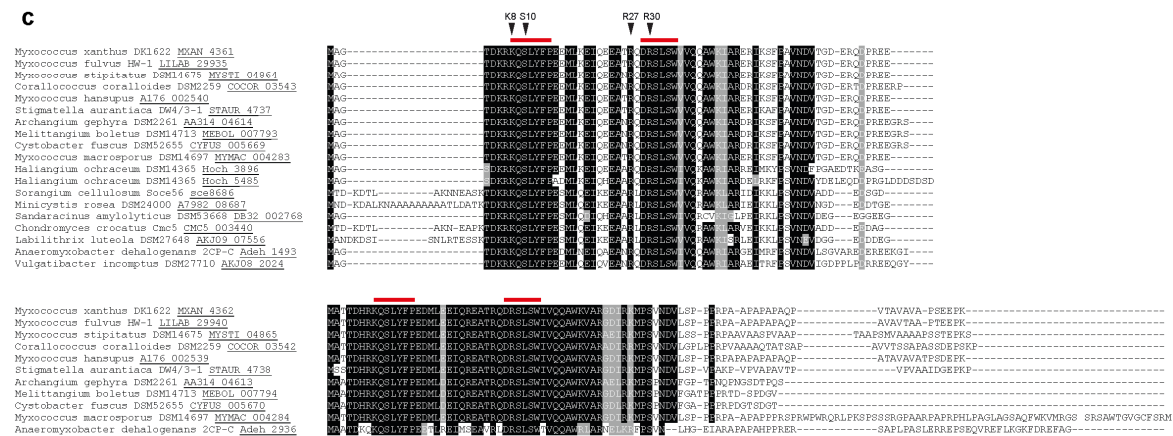

**Supplementary Figure 1. CdbA and CdbB are paralogs encoded in an operon and conserved in Myxococcales**

**a.** Operon mapping of *cdbAB* locus. Arrows indicate the direction of transcription of genes. The lines labeled 1 to 3 show fragments amplified by PCR. The PCR products were amplified using genomic DNA, cDNA and RNA as templates as indicated and separated on a 1% agarose gel. Molecular size markers in kb are shown on the left. Similar results were obtained in two independent experiments. **b.** Conservation of the *cdbAB* locus in Myxococcales. 16s rRNA sequences were aligned with ClustalW using MEGA7 and a phylogenetic tree was generated using the Maximum Likelihood method. CdbA/B homologs were identified using BLASTP analysis. Arrows indicate the direction of transcription. Numbers in the arrows indicate % identity/similarity between CdbA/B from *M. xanthus* and their homologs calculated using EMBOSS Needle software (pairwise sequence alignment). **c.** Alignment of CdbA and CdbB with their homologs from other Myxococcales with fully sequenced genomes. Sequences were aligned with ClustalW using MEGA7. Red lines indicate 100% conserved regions. Arrows above the plot indicate the position of amino acids involved in DNA- and c-di-GMP-coordination.

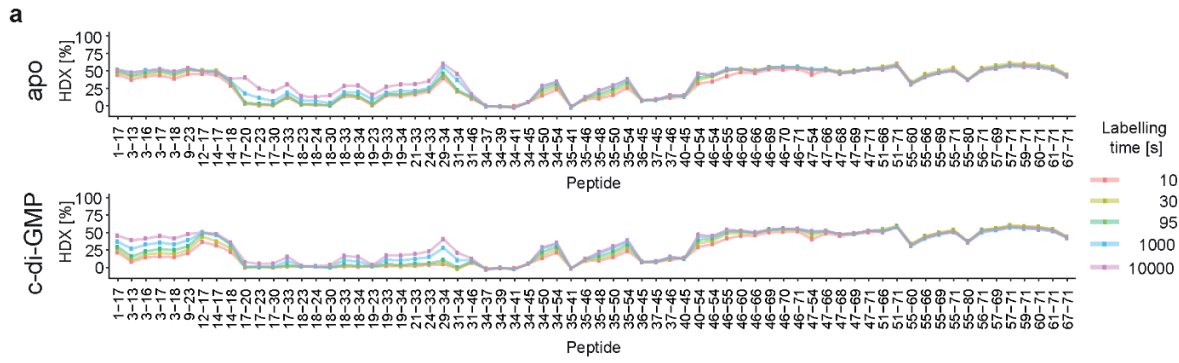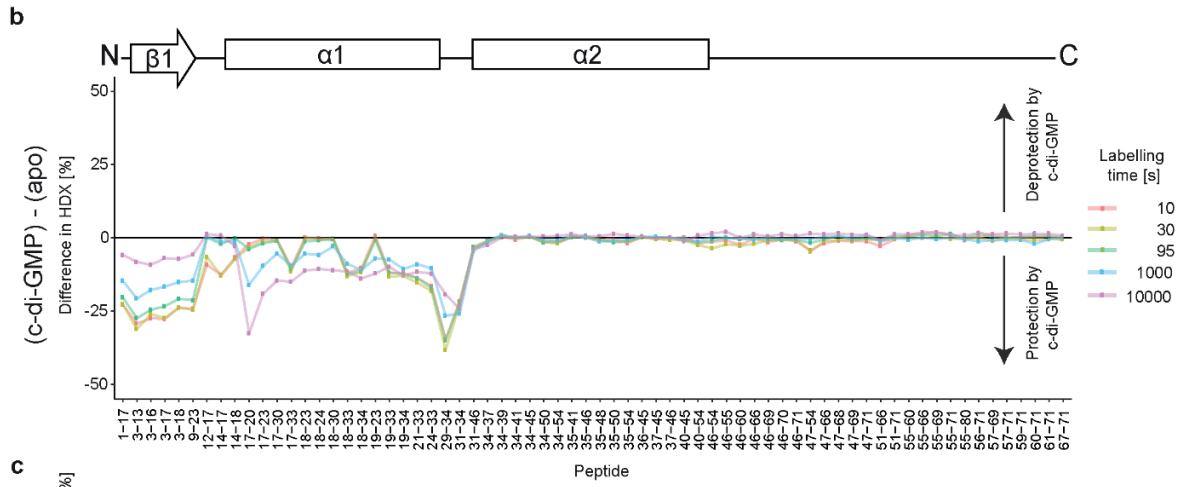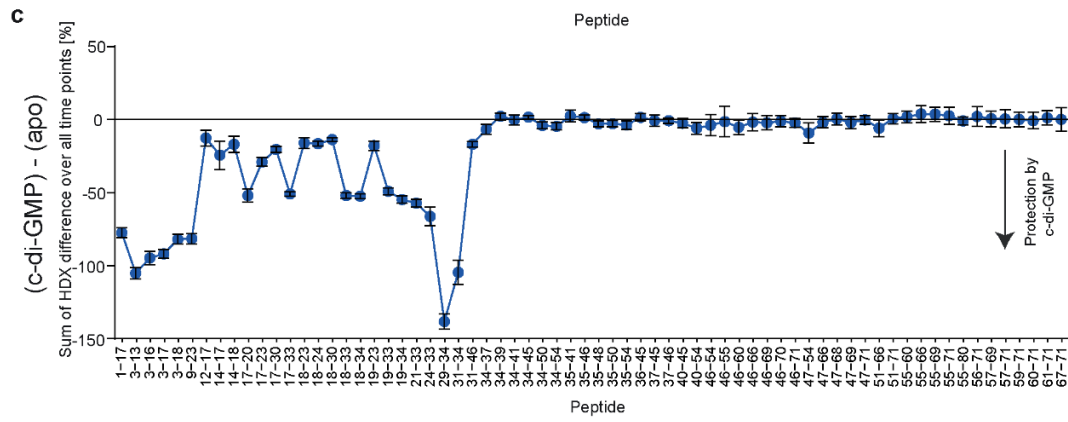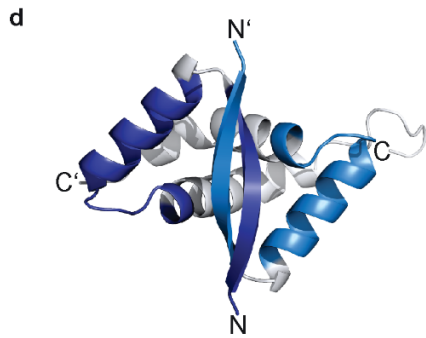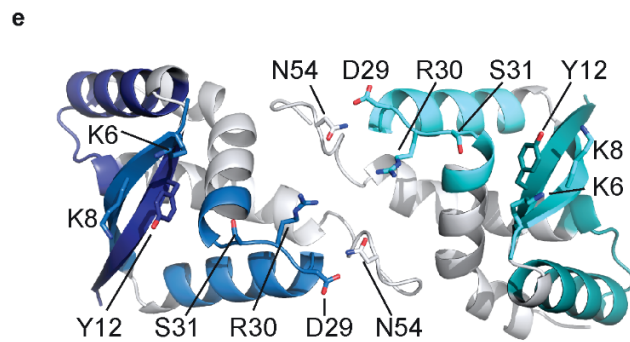

**Supplementary Figure 2. HDX assay for CdbA in the presence and absence of c-di-GMP.**

**a.** Relative HDX profiles of CdbA in the apo-state (top) and c-di-GMP-bound state (bottom). **b.** Difference between the relative HDX of c-di-GMP-bound and apo-CdbA. The secondary structure of CdbA is depicted above the plot. **c.** The differences in HDX between c-di-GMP-bound and apo-CdbA at each time point (i.e. 10, 30, 95, 1000 and 10000 s) were summed for each peptide. The graph depicts the summed means of differences  $\pm$  SD (n=3 separate reactions) for each peptide. **d.** Peptides with reduced (>0.5 Da difference) HDX in the c-di-GMP-bound state of CdbA illustrated on the CdbA dimer and colored in dark and light blue for the respective monomer. **e.** Peptides with reduced (>0.5 Da difference) HDX in the c-di-GMP-bound state of CdbA illustrated on the CdbA tetramer. Amino acids lining the polar pocket established at the dimer/dimer interface are shown as sticks. Plots of hydrogen/deuterium exchange profiles were generated with MEMHDX<sup>1</sup>.

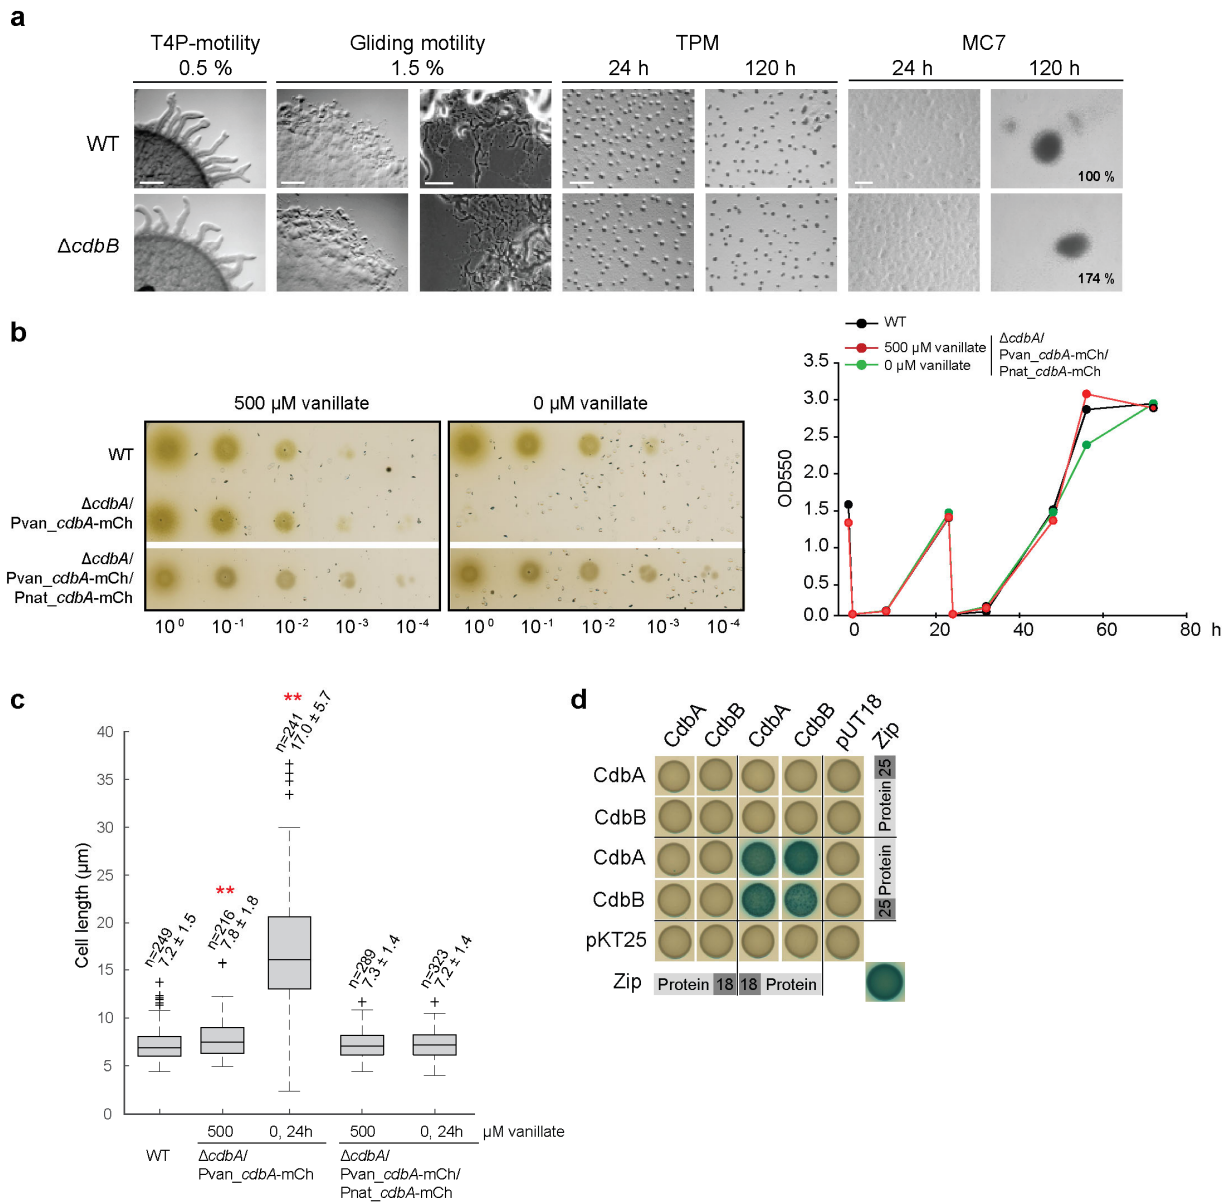

**Supplementary Figure 3. CdbB is not important for motility, growth and development; CdbA-mCherry is active and CdbA and CdbB interact in BACTH.**

**a.** Lack of CdbB causes no defects in motility and development. T4P-dependent motility and gliding motility were analyzed on 0.5% and 1.5% agar, respectively. Fruiting body formation and sporulation were analyzed under two different starvation conditions: TPM agar and MC7 submerged culture. Numbers for submerged culture indicate heat- and sonication resistant spores formed after 120h of starvation as a percentage of WT (100%). Experiment was repeated twice with similar result. Scale bars, 1 mm (0.5% agar), 1 mm (1.5% agar, left), 50  $\mu$ m

(1.5% agar, right), 1 mm (TPM agar), 100  $\mu$ m (MC7). **b.** CdbA-mCherry is active. Growth of indicated strains on solid surface (left) and in suspension (right) in the presence and absence of vanillate driving synthesis of CdbA. Results for WT,  $\Delta cdbA/Pvan\_cbdA$ -mCh and  $\Delta cdbA/Pvan\_cbdA$ -mCh/Pnat\_*cbdA*-mCh are the same as in Fig. 6e and all the strains were spotted on the same plate. Similar results were obtained in two independent experiments. Source data are provided as a Source Data file. **c.** Cell length distributions of cells of indicated genotypes grown in the presence or absence of vanillate. In the boxplots, boxes enclose the 25<sup>th</sup> and 75<sup>th</sup> percentile with the black line representing the mean, whiskers indicate the 10<sup>th</sup> and 90<sup>th</sup> percentile, and “+” indicates outliers. Numbers above each box indicate number of cells used for quantification (n) and mean  $\pm$  SD. \*\*  $p < 0.001$  in two-sided Student’s t-test, in comparison to WT. Exact p-values and source data are provided in the Source data file. **d.** Bacterial Two-hybrid analysis of interactions between CdbA and CdbB. The indicated proteins were fused to the N or C terminus of the T25 and T18 fragments of CyaA. Zip indicates the leucine zipper from GCN4 fused to T25 and T18, used as a positive control. Experiment was repeated twice with similar result. Source data are provided as a Source Data file.

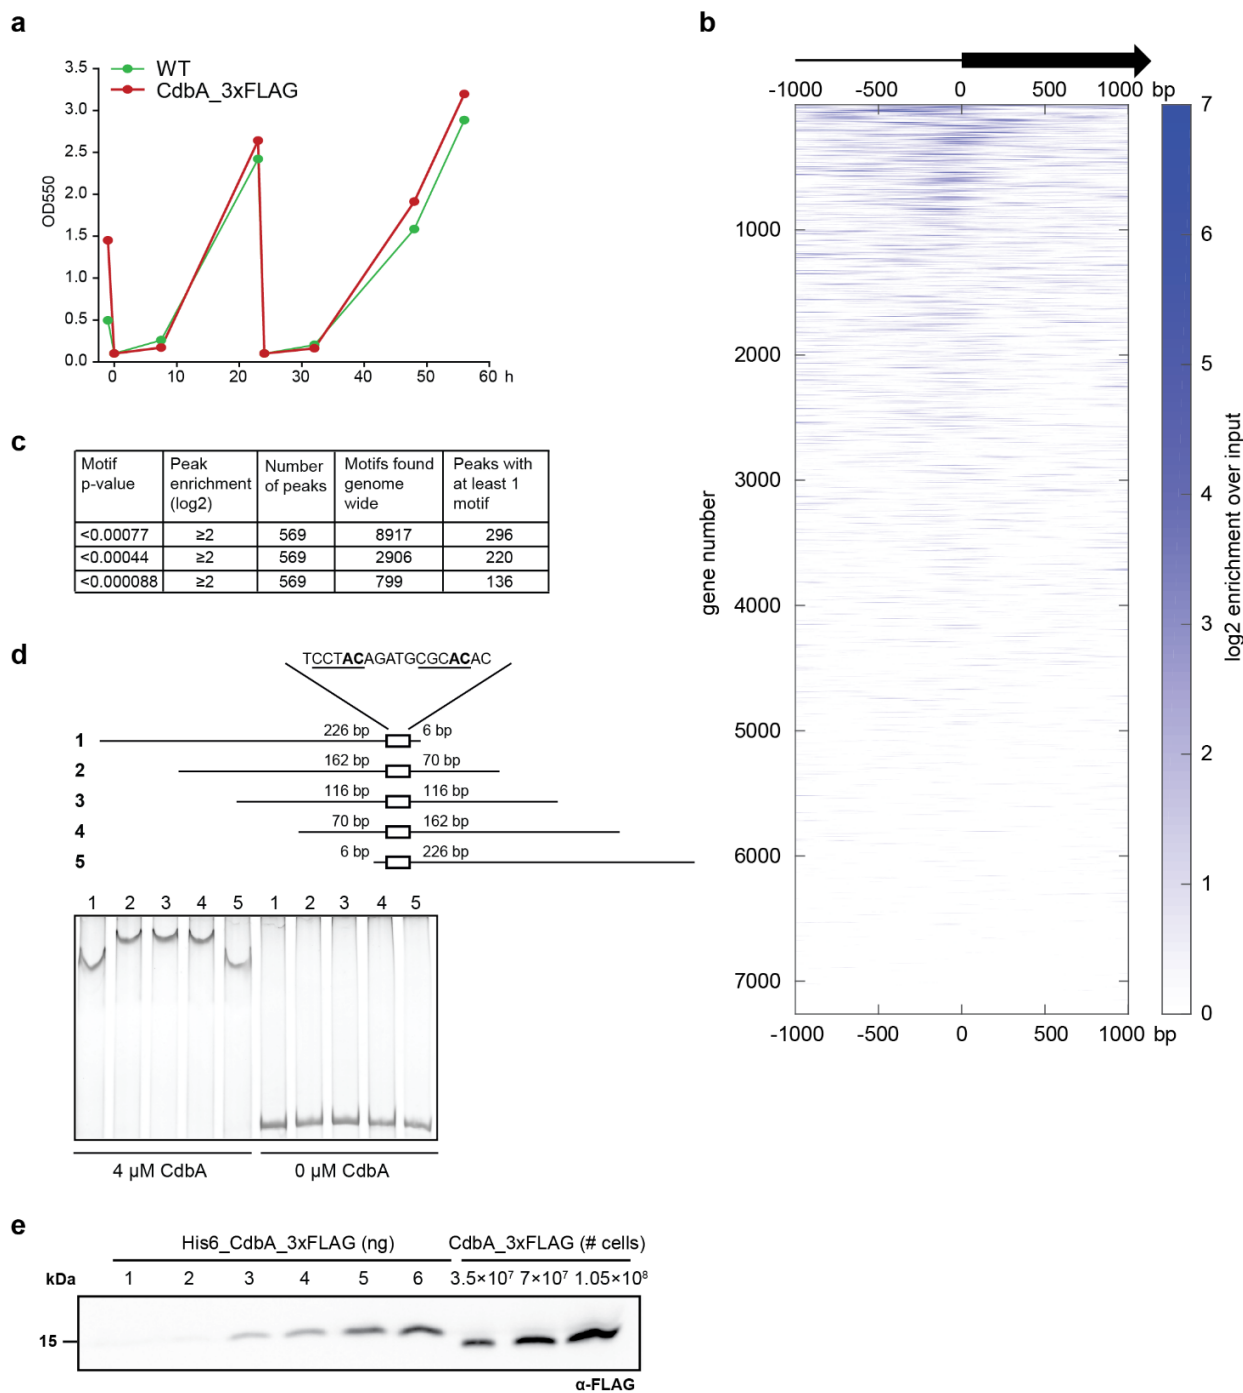

### Supplementary Figure 4. Supplementary information for ChIP-seq experiment

**a.** C-terminal 3×FLAG tag does not affect CdbA function. Growth of WT and CdbA-3×FLAG strains in liquid culture. Experiment was repeated twice with the similar results. Source data are provided as a Source Data file. **b.** Enrichment of top CdbA ChIP-seq peaks in promoter regions.

Each row in the heatmap represents 1000 bp starting from each *M. xanthus* ORF (oriented as shown in the gene cartoon, such that the start codon occupies the same position in each row), as well as the 1000 bp upstream of the start site of each ORF. Color reflects the degree of CdbA ChIP-seq signal enrichment over input in  $\log_2$  (bluer color = greater enrichment). Rows were sorted by  $\log_2$  of CdbA ChIP-seq signal enrichment over input from highest (top) to lowest (bottom). **c.** Correlation between ChIP-seq peaks and MEME-ChIP-based direct repeat identified in *M. xanthus* genome *in silico*. **d.** Circular permutation analysis of DNA bending by CdbA. The left panel shows DNA fragments generated by PCR where CdbA binding motif (direct repeat) is located at the different positions. The right panel shows the results of the gel shift experiment with/without CdbA and circularly permuted DNA fragments (1 to 5). Fragments with the binding site closer to the center migrate slower than the fragments which have the site closer to the ends. Experiment was repeated twice with similar results. Source data are provided as a Source Data file. **e.** Quantification of CdbA molecules per cell. Different amounts (1-6 ng) of purified His<sub>6</sub>-CdbA-3×FLAG were loaded in parallel with cell extracts from a known number of WT cells (3 different dilutions) and probed with  $\alpha$ -FLAG antibodies. Number of molecules per cell was calculated as an average of two biological replicates from the intensity of the lysates bands in comparison to a standard curve prepared from the dilution series of known purified protein amounts from the same immunoblot. Source data are provided as a Source Data file.

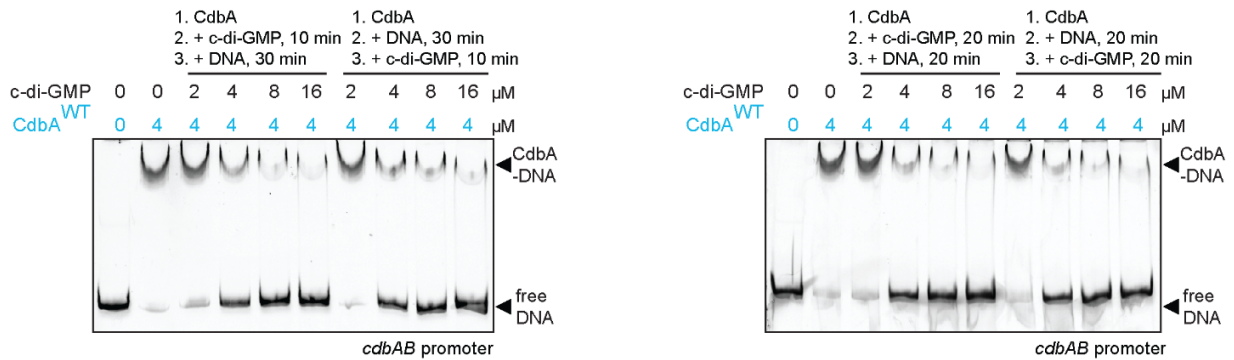

**Supplementary Figure 5. DNA binding by CdbA is inhibited by c-di-GMP independently of the order of addition of c-di-GMP and DNA**

EMSA experiment with CdbA in the presence of c-di-GMP. The DNA fragment used covers the *cdbAB* promoter (see also Fig. 7a). Left panel, 4 μM CdbA was incubated with the indicated concentrations of c-di-GMP for 10 min and then with DNA for 30 min, or with DNA for 30 min and then with c-di-GMP for 10 min. Right panel, 4 μM CdbA was incubated with the indicated concentrations of c-di-GMP for 20 min and then with DNA for 20 min, or with DNA for 20 min and then with c-di-GMP for 20 min. Similar results were obtained in two independent experiments. Source data are provided as a Source Data file.

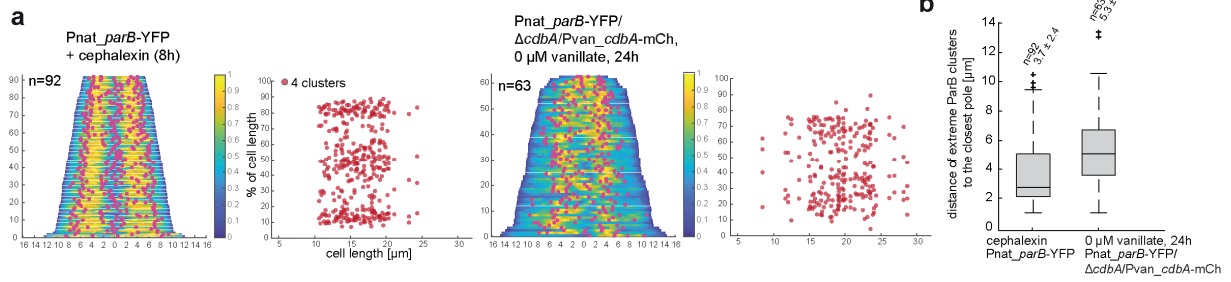

**c**  
 $\Delta$ *mgIA*/*Pnat\_parB*-YFP/ $\Delta$ *cdbA*/Pvan\_ *cdbA*-mCh, 0  $\mu$ M vanillate

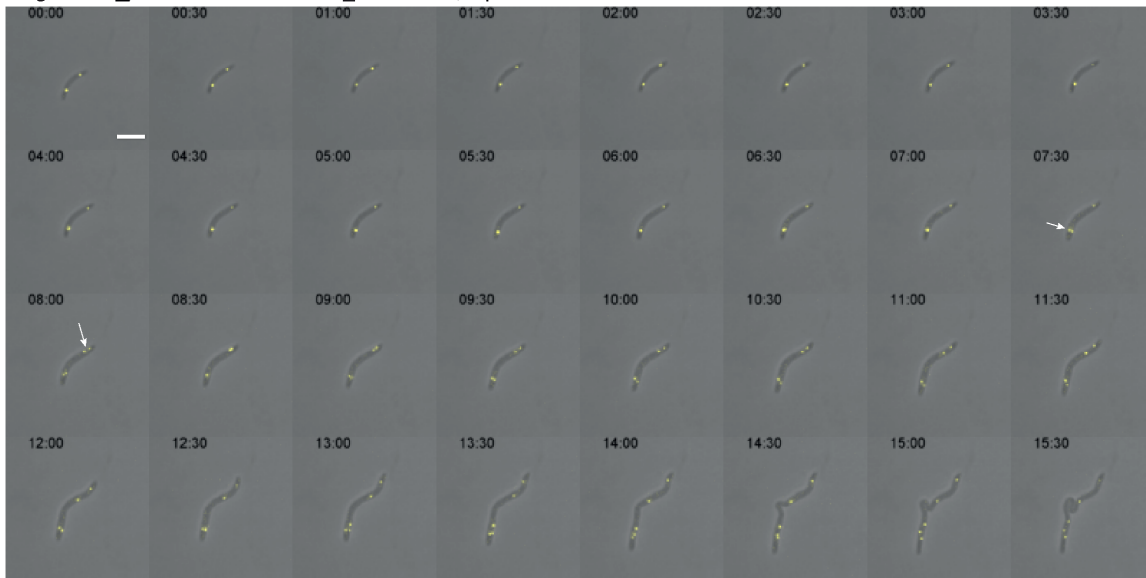

$\Delta$ *mgIA*/*Pnat\_parB*-YFP, 0  $\mu$ M vanillate

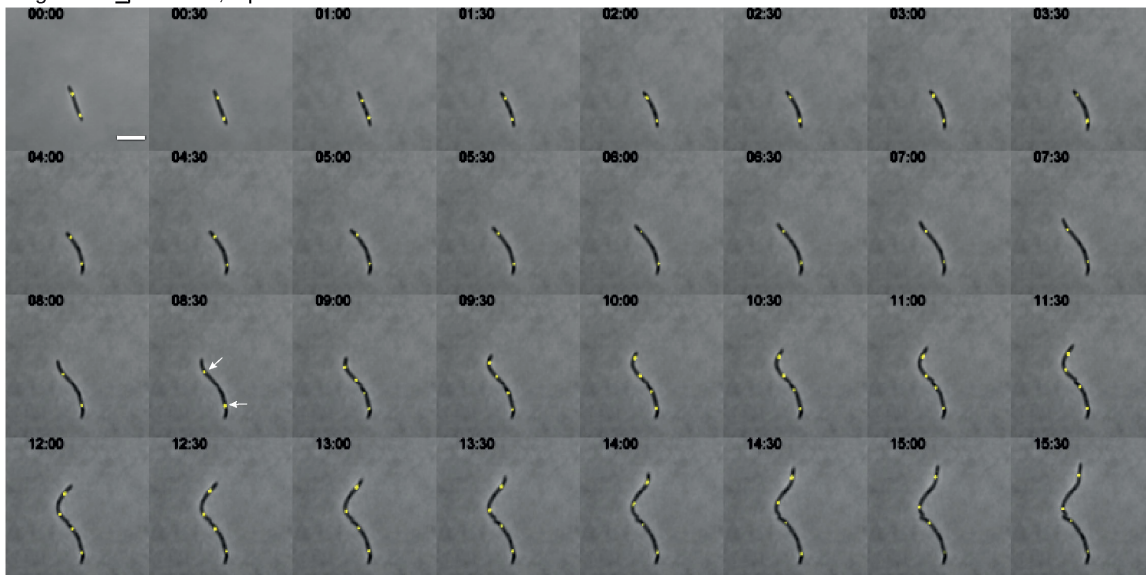

**Supplementary Figure 6. Lack of CdbA affects segregation of ParB-YFP clusters.**

**a.** Same analysis as in Fig. 7a but only including cells with four ParB-YFP clusters: demographs showing overlay of DAPI staining and ParB-YFP localization and scatter plot showing the position of ParB-YFP clusters along the long cell axes as a function of cell length. n is indicated for each strain. **b.** Same analysis as in Fig. 7c but only including cells with four ParB-YFP clusters: box plot showing distance of extreme ParB clusters to the closest pole as a function of cell length. In the boxplots, boxes enclose the 25<sup>th</sup> and 75<sup>th</sup> percentile with the black line representing the mean, whiskers indicate the 10<sup>th</sup> and 90<sup>th</sup> percentile, and “+” indicates outliers. Numbers above each box indicate number of cells used for quantification (n) and mean  $\pm$  SD. \*\* p<0.001 in two-sided Student’s t-test. Exact p-values and source data are provided in the Source data file. **c.** Time-lapse images of ParB-YFP localization and segregation. For time-lapse microscopy, non-motile strains were created by deletion of *mgIA* resulting in a complete loss of motility<sup>2</sup>. Cells of  $\Delta mgIA/Pnat\_parB\text{-YFP}/\Delta cdbA/Pvan\_cbdA\text{-mCh}$  grown in the presence of 500  $\mu$ M vanillate were washed, spotted on agar pads without vanillate and imaged every 0.5 h for 15.5 h. As a control, cells of  $\Delta mgIA/Pnat\_parB\text{-YFP}$  were used under the same conditions, without vanillate. White arrows indicate duplication event of ParB-YFP followed by rapid segregation in the  $\Delta mgIA/Pnat\_parB\text{-YFP}$  strain and slow segregation in the  $\Delta mgIA/Pnat\_parB\text{-YFP}/\Delta cdbA/Pvan\_cbdA\text{-mCh}$  strain. Representative cells are shown. Scale bars, 5  $\mu$ m. Similar results were obtained in two independent experiments.

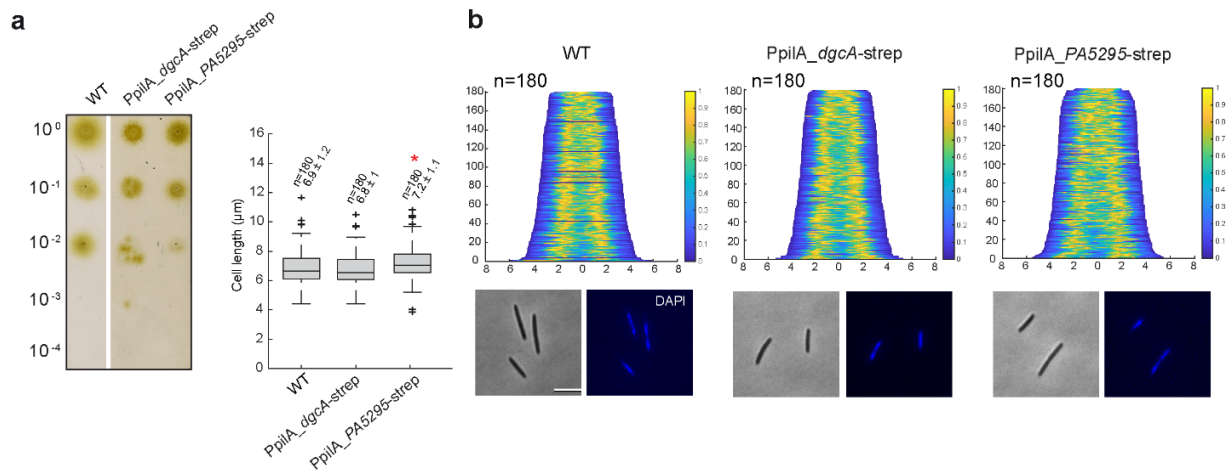

**Supplementary Figure 7. Manipulating c-di-GMP level does not visibly affect chromosome organization.**

**a.** Left panel: growth of indicated strains on solid surface. All the strains were spotted on the same plate. Experiment was repeated twice and representative image is shown. Right panel: box plot showing cell length distributions of cells of indicated genotypes. In the boxplots, boxes enclose the 25<sup>th</sup> and 75<sup>th</sup> percentile with the black line representing the mean, whiskers indicate the 10<sup>th</sup> and 90<sup>th</sup> percentile, and “+” indicates outliers. Numbers above each box indicate number of cells used for quantification (n) and mean ± standard deviation. \* p<0.05 in a two-sided Student’s t-test, in comparison to WT. Exact p-values and source data are provided in the Source data file. **b.** Upper panel: demographs showing DAPI staining of cells of indicated genotypes. n=180 for each strain. Lower panel: images of representative cells used for the analysis. Scale bar, 5 μm.

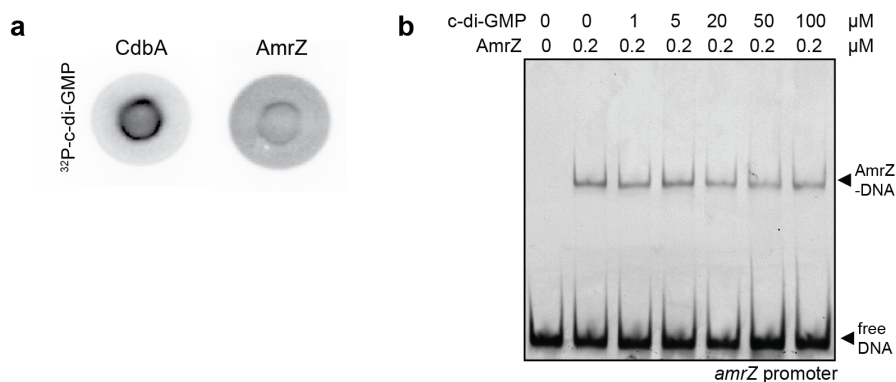

**Supplementary Figure 8. Ribbon-helix-helix protein AmrZ does not bind c-di-GMP and c-di-GMP does not affect AmrZ-DNA binding**

**a.** Purified AmrZ-His<sub>6</sub> does not bind <sup>32</sup>P-c-di-GMP in DRaCALA. Purified CdbA-His<sub>6</sub> was used as a positive control. Experiment was repeated twice with the same result. Source data are provided as a Source Data file. **b.** c-di-GMP has no effect on AmrZ binding to its promoter in EMSA. Concentration of AmrZ and c-di-GMP is indicated for each lane. Experiment was repeated twice with the same result. Source data are provided as a Source Data file.

### Supplementary Table 1.

Data collection and refinement statistics for CdbA structure

|                                                       | Pt Derivative       | Form 1              | Form 2                |
|-------------------------------------------------------|---------------------|---------------------|-----------------------|
| <b>Data collection</b>                                |                     |                     |                       |
| Space group                                           | I4 <sub>1</sub> 22  | I4 <sub>1</sub> 22  | I4 <sub>1</sub> 22    |
| Cell dimensions<br><i>a</i> , <i>b</i> , <i>c</i> (Å) | 61.69, 61.69, 92.52 | 61.47, 61.47, 94.91 | 134.69, 134.69, 53.13 |
| Resolution (Å)                                        | 3.2                 | 2.24                | 2.33                  |
| Wavelength                                            | 1.0721              | 1                   | 1                     |
| <i>R</i> <sub>merge</sub>                             | 0.09 (0.73)*        | 0.05 (1.34)         | 0.09 (1.60)           |
| <i>I</i> / $\sigma$ <i>I</i>                          | 53.4 (9.1)          | 19.6 (1.7)          | 17.5 (1.6)            |
| CC(1/2)                                               | 100 (100)           | 100 (60.0)          | 99.9 (64.7)           |
| Completeness (%)                                      | 99.3 (100)          | 100 (100)           | 99.4 (95.6)           |
| Redundancy                                            | 67.2 (49.3)         | 11.1 (5.6)          | 23.6 (19.2)           |
| <b>Refinement</b>                                     |                     |                     |                       |
| Resolution (Å)                                        |                     | 2.24                | 2.33                  |
| <i>R</i> <sub>work</sub> / <i>R</i> <sub>free</sub>   |                     | 23.2/27.7           | 21.6/24.4             |
| R.m.s. deviations                                     |                     |                     |                       |
| Bond lengths (Å)                                      |                     | 0.006               | 0.006                 |
| Bond angles (°)                                       |                     | 1.37                | 1.55                  |

\*Values in parentheses are for highest-resolution shell.

## Supplementary Table 2.

Strains used in this work

| Strain                   | Genotype                                                                                                                | Reference  |
|--------------------------|-------------------------------------------------------------------------------------------------------------------------|------------|
| <b><i>M. xanthus</i></b> |                                                                                                                         |            |
| DK1622                   | Wild-type                                                                                                               | 3          |
| SA3535                   | <i>attB::pTP110 (PpilA-PA5295-strepll)</i>                                                                              | 4          |
| SA3543                   | <i>attB::pTP114 (PpilA-dgcA-strepll)</i>                                                                                | 4          |
| SA4749                   | $\Delta$ <i>mglA</i> ; <i>attB::pAH07 (Pnat parB-YFP)</i>                                                               | 5          |
| SA5645                   | $\Delta$ <i>cdbB</i>                                                                                                    | This work  |
| SA5685                   | <i>attB::pDJS125 (Pnat cdbA-mCherry)</i>                                                                                | This work  |
| SA5690                   | $\Delta$ <i>cdbA</i> ; <i>mxan18-19::pDJS148 (Pvan cdbA-Cherry)</i>                                                     | This work  |
| SA5691                   | SA5690; <i>attB::pDJS151 (Pnat parB-YFP)</i>                                                                            | This work  |
| SA5693                   | <i>attB::pDJS151 (Pnat parB-YFP)</i>                                                                                    | This work  |
| SA5697                   | SA5690; <i>attB::pDJS125 (Pnat cdbA-mCherry)</i>                                                                        | This work  |
| SA8802                   | SA5690; <i>attB::pDJS154 (Pnat cdbA<sup>K8A/S10A</sup>-mCherry)</i>                                                     | This work  |
| SA8805                   | SA5690; <i>attB::pDJS155 (Pnat cdbA<sup>R27A/R30A</sup>-mCherry)</i>                                                    | This work  |
| SA8810                   | $\Delta$ <i>cdbA<math>\Delta</math><i>cdbB</i>; <i>mxan18-19::pDJS148 (P<sub>van</sub> cdbA-Cherry)</i></i>             | This work  |
| SA8813                   | <i>cdbA_3xFLAG</i> ; native site                                                                                        | This work  |
| SA8814                   | SA5690; $\Delta$ <i>mglA</i> ; <i>attB::pDJS151 (Pnat parB-YFP)</i>                                                     | This work  |
| SA8834                   | <i>parB_3xFLAG</i> ; native site                                                                                        | This work  |
| <b><i>E. coli</i></b>    |                                                                                                                         |            |
| BL21(DE3)                | F- <i>ompT hsdSB (rB- mB-) gal dcm (DE3)</i>                                                                            | Invitrogen |
| Mach1                    | F- $\Phi$ 80 <i>lacZ</i> $\Delta$ M15 $\Delta$ <i>lacX74</i> <i>hsdR</i> (rK-, mK+) $\Delta$ <i>recA1398 endA1 tonA</i> | Invitrogen |
| Rosetta2(DE3)            | F- <i>ompT hsdSB (rB- mB-) gal dcm (DE3) pRARE2 (CamR)</i>                                                              | Novagene   |
| BTH101                   | F- <i>cya-99 araD139 galE15 galK16 rpsL1 (Str<sup>r</sup>) hsdR2 mcrA1 mcrB1</i>                                        | Euromedex  |

### Supplementary Table 3.

Plasmids used in this work

| Plasmid    | Description                                                                      | Reference |
|------------|----------------------------------------------------------------------------------|-----------|
| pET24b(+)  | Expression vector, Kan <sup>R</sup>                                              | Novagen   |
| pET28a(+)  | Expression vector, Kan <sup>R</sup>                                              | Novagen   |
| pRSFDuet-1 | Dual expression vector, Kan <sup>R</sup>                                         | Novagen   |
| pBJ114     | Kan <sup>R</sup> , <i>galk</i>                                                   | 6         |
| pSW105     | <i>PpilA</i> , Kan <sup>R</sup>                                                  | 7         |
| pSWU19     | Kan <sup>R</sup>                                                                 | 8         |
| pMR3691    | <i>vanR</i> -P <sub>van</sub> , Tet <sup>R</sup>                                 | 9         |
| pKT25      | Two-hybrid plasmid, <i>cyaAT25</i> C-terminal fusion, Km <sup>R</sup>            | Euromedex |
| pUT18      | Two-hybrid plasmid, <i>cyaAT18</i> N-terminal fusion, Amp <sup>R</sup>           | Euromedex |
| pKNT25     | Two-hybrid plasmid, <i>cyaAT25</i> N-terminal fusion, Km <sup>R</sup>            | Euromedex |
| pUT18C     | Two-hybrid plasmid, <i>cyaAT18</i> C-terminal fusion, Amp <sup>R</sup>           | Euromedex |
| pKT25-zip  | Two-hybrid control plasmid Km <sup>r</sup>                                       | Euromedex |
| pUT18C-zip | Two-hybrid control plasmid Amp <sup>r</sup>                                      | Euromedex |
| pDJS31     | pET24b(+); <i>dgcA</i> _His <sub>6</sub> , Kan <sup>R</sup>                      | 4         |
| pAH07      | pSWU30, P <sub>nat</sub> <i>parB</i> -YFP, Tet <sup>R</sup>                      | 10        |
| pSL16      | pBJ114; in-frame deletion construct for <i>mgIA</i> , Kan <sup>R</sup>           | 2         |
| pNG62      | pSWU19; MCS-linker-mCherry, Kan <sup>R</sup>                                     | This work |
| pDJS83     | pET24b(+); <i>cdbB</i> _His <sub>6</sub> , Kan <sup>R</sup>                      | This work |
| pDJS85     | pBJ114; in-frame deletion construct for <i>cdbA-B</i> , Kan <sup>R</sup>         | This work |
| pDJS86     | pET24b(+); <i>cdbA</i> _His <sub>6</sub> , Kan <sup>R</sup>                      | This work |
| pDJS97     | pBJ114; in-frame deletion construct for <i>cdbB</i> , Kan <sup>R</sup>           | This work |
| pDJS99     | pBJ114; in-frame deletion construct for <i>cdbA</i> , Kan <sup>R</sup>           | This work |
| pDJS105    | pET24b(+); <i>amrZ</i> _His <sub>6</sub> , Kan <sup>R</sup>                      | This work |
| pDJS107    | pET24b(+); <i>cdbA</i> <sup>K8A/S10A</sup> _His <sub>6</sub> , Kan <sup>R</sup>  | This work |
| pDJS125    | pNG62; P <sub>nat</sub> <i>cdbA</i> -mCherry, Kan <sup>R</sup>                   | This work |
| pDJS127    | pET24b(+); <i>cdbA</i> <sup>R27A/R30A</sup> _His <sub>6</sub> , Kan <sup>R</sup> | This work |
| pDJS129    | pSW105; P <sub>nat</sub> <i>cdbA</i> <sup>K8A/S10A</sup> , Kan <sup>R</sup>      | This work |
| pDJS130    | pSW105; P <sub>nat</sub> <i>cdbA</i> <sup>R27A/R30A</sup> , Kan <sup>R</sup>     | This work |
| pDJS132    | pKT25, <i>cyaT25</i> – <i>cdbA</i> , Km <sup>R</sup>                             | This work |
| pDJS133    | pKNT25, <i>cdbA</i> - <i>cyaT25</i> , Km <sup>R</sup>                            | This work |
| pDJS134    | pUT18, <i>cdbA</i> - <i>cyaT18</i> , Amp <sup>R</sup>                            | This work |
| pDJS135    | pUT18C, <i>cyaT18</i> – <i>cdbA</i> , Amp <sup>R</sup>                           | This work |
| pDJS136    | pKT25, <i>cyaT25</i> – <i>cdbB</i> , Km <sup>R</sup>                             | This work |
| pDJS137    | pKNT25, <i>cdbB</i> - <i>cyaT25</i> , Km <sup>R</sup>                            | This work |
| pDJS138    | pUT18, <i>cdbB</i> - <i>cyaT18</i> , Amp <sup>R</sup>                            | This work |

|         |                                                                         |           |
|---------|-------------------------------------------------------------------------|-----------|
| pDJS139 | pUT18C, <i>cyaT18</i> – <i>cdbB</i> , Amp <sup>R</sup>                  | This work |
| pDJS143 | pRSFDuet-1; <i>cdbA</i> -mCherry, Kan <sup>R</sup>                      | This work |
| pDJS148 | pMR3691; <i>cdbA</i> -mCherry, Tet <sup>R</sup>                         | This work |
| pDJS151 | pSWU19, Pnat <i>parB</i> -YFP, Kan <sup>R</sup>                         | This work |
| pDJS154 | pNG62; Pnat <i>cdbA</i> <sup>K8A/S10A</sup> -mCherry, Kan <sup>R</sup>  | This work |
| pDJS155 | pNG62; Pnat <i>cdbA</i> <sup>R27A/R30A</sup> -mCherry, Kan <sup>R</sup> | This work |
| pDJS170 | pBJ114; <i>cdbA</i> _3xFLAG; native site, Kan <sup>R</sup>              | This work |
| pDJS177 | pET28a(+); His <sub>6</sub> _ <i>cdbA</i> _3xFLAG, Kan <sup>R</sup>     | This work |
| pDJS179 | pBJ114; <i>parB</i> _3xFLAG; native site, Kan <sup>R</sup>              | This work |

### Supplementary Table 4.

Primers used in this work

| Primer name            | Sequence (5'-3')                                                      |
|------------------------|-----------------------------------------------------------------------|
| <b>Cloning primers</b> |                                                                       |
| 4362 F                 | ATCGCATATGATGGCTACGACGGACCATCGT                                       |
| 4362 -stop R           | ATCGAAGCTTCTTGGGCTCTTCGGAGGGCGC                                       |
| 4361-2_A               | ATCGGGTACCTTCCCATCAGGAGGGCCGTGG                                       |
| 4361-2_B (5aa)         | GGGCTCTTCGTCCGTGCCTGCCATACT                                           |
| 4361-2_C (5aa)         | GGCACCGACGAAGAGCCCAAGTAGTTC                                           |
| 4361-2_D               | ATCGTCTAGAGCGCCAGGAAGGTCTGTGCGT                                       |
| 4361 Fw                | ATCGCATATGATGGCAGGCACCGACAAGCGC                                       |
| 4361 -stop Rev         | ATCGAAGCTTCTCCTCCCGAGGGTCCTGGCG                                       |
| 4362_A                 | ATCGGGTACCGAGGCACGTGCGGTTGAAGGC                                       |
| 4362_B 5aa             | GGGCTCTTCGTCCGTCTAGCCATCCG                                            |
| 4362_C 5aa             | ACGACGGACGAAGAGCCCAAGTAGTTC                                           |
| 4361_B 5aa             | CTCCCGAGGGTCGGTGCCTGCCATACT                                           |
| 4361_C 5aa             | GGCACCGACCCTCGGGAGGAGTAACGA                                           |
| 4361_D 5aa             | ATCGTCTAGATGCGCGAACTGACGGTGGGTG                                       |
| 4361 AQA Fw            | ATCGCATATGATGGCAGGCACCGACAAGCGCGCGCAGGCGCTGTA                         |
| 4361 R27,30A F         | GAGGCGACCGCGCAGGACGCGTCCCTTTCC                                        |
| 4361 R27,30A R         | GGAAAGGGACGCGTCCTGCGCGGTGCGCTC                                        |
| Pnat 4361 F KpnI       | ATCGGGTACCCGGACCGCGGTGGAATGGAG                                        |
| 4361 -st R BamHI       | ATCGGGATCCCTCCTCCCGAGGGTCCTGGC                                        |
| 4361 AQA +             | CGACAAGCGCGCGCAGGCGCTGTA CTCC                                         |
| 4361 AQA -             | GGGAAGTACAGCGCCTGCGCGGCTTGTGCG                                        |
| DSZ 24                 | ATCGGGTACCCCTACTTGTACAGCTCGTCCATGC                                    |
| 4361-2 Fw              | ATCGCATATGGCAGGCACCGACAAGCGCAAG                                       |
| GFP rv_STOP_EcoRI      | ATCGGAATTCTTACTTGTACAGCTCGTCCAT                                       |
| DA-325                 | ACACCGCATATGGAGGCGTGTC                                                |
| KA439                  | GCGTCTAGATCACTTGTACAGCTCGTCCATGCC                                     |
| 4361 3xFLAG fw         | TACAAGGACCACGACATCGACTACAAGGACGACGACGACAAGTGA<br>CGACGGATGGCTACGACGGA |
| 4361 3xFLAG rev        | GTCGATGTCGTGGTCCTTGTAGTCGCCGTCGTGGTCCTTGTAGTCC<br>TCTCCCGAGGGTCCTGGC  |
| 4361 no start NdeI     | ATCGCATATGGCAGGCACCGACAAGCGCAA                                        |
| 4361 3xFLAG stop BamHI | ATCGGGATCCCTCACTTGTGTCGTGTCGTGTCCT                                    |
| ParB 3xFLAG A          | ATCGGAATTCAAGCTCCCCATCGAGTCCAT                                        |
| ParB 3xFLAG B          | GTCGATGTCGTGGTCCTTGTAGTCGCCGTCGTGGTCCTTGTAGTCC<br>TCTTCCTGAGAAGCTTCA  |

|                                           |                                                                       |
|-------------------------------------------|-----------------------------------------------------------------------|
| ParB 3xFLAG C                             | TACAAGGACCACGACATCGACTACAAGGACGACGACGACAAGTGA<br>GACGTGGCGCTCCTTGGCGG |
| ParB 3xFLAG D                             | ATCGTCTAGACTCGCGGACGCGGTTCGACCA                                       |
| amrZ F                                    | ATCGCATATGATGCGCCACTGAAACAGGC                                         |
| amrZ -stop R                              | ATCGAAGCTTGGCCTGGGCCAGCTCCGCAT                                        |
| BTH 4361 Xbal fw<br>pKT25/pUT18C          | ATCGGTCTAGAGATGGCAGGCACCGACAAGCGC                                     |
| BTH 4361 KpnI rev stop<br>pKT25/pUT18C    | ATCGGGGTACCTTACTCCTCCCGAGGGTCCTG                                      |
| BTH 4361 Xbal fw<br>pKNT25/pUT18          | ATCGGTCTAGAATGGCAGGCACCGACAAGCGC                                      |
| BTH 4361 KpnI rev<br>pKNT25/pUT18         | ATCGGGGTACCGCCTCCTCCCGAGGGTCCTGGCG                                    |
| BTH 4362 Xbal fw<br>pKT25/pUT18C          | ATCGGTCTAGAGATGGCTACGACGGACCATCGT                                     |
| BTH 4362 KpnI rev stop<br>pKT25/pUT18C    | ATCGGGGTACCCTACTTGGGCTCTTCGGAGGG                                      |
| BTH 4362 Xbal fw<br>pKNT25/pUT18          | ATCGGTCTAGAATGGCTACGACGGACCATCGT                                      |
| BTH 4362 KpnI rev<br>pKNT25/pUT18         | ATCGGGGTACCGCCTTGGGCTCTTCGGAGGGCGC                                    |
| <b>EMSA primers</b>                       |                                                                       |
| 4361 up250 HEX F                          | [HEX] CCACGGGCCCCGCCTGGAGAT                                           |
| 4361 up R                                 | ACTTGGGTCTCCGGGGCGGA                                                  |
| HEX 7438 F                                | [HEX] GGTAAGGGTGACGATGCC                                              |
| 7438 qPCR rev                             | ACGTACACCACCGAGTCCTT                                                  |
| EMSA amrZ HEX fw                          | [HEX] AACGACCGGTGGTCAGAAGG                                            |
| EMSA amrZ rev                             | GTCAATTGTGCGTTGCGTGC                                                  |
| EMSA 4058 HEX fw                          | [HEX] GACACACCTTCTCCGAGCGG                                            |
| EMSA 4058 rev                             | GTCGAGCTTCTCGCGGTTGA                                                  |
| EMSA 4328 HEX fw                          | [HEX] AGGAAGAGGGCGGCGGCGAG                                            |
| EMSA 4328 rev                             | CTTGTCGAAACGGAGGTGGG                                                  |
| EMSA 4058 motif mut +                     | AGAATGT <b>AC</b> GCGCATCT <b>AC</b> AGGAGGTCTG                       |
| EMSA 4058 motif mut -                     | CGACCTCCT <b>GT</b> AGATGCGC <b>GT</b> ACATTCT                        |
| EMSA 4058 motif mut half+                 | AGAATGT <b>GT</b> GCGCATCT <b>AC</b> AGGAGGTCTG                       |
| EMSA 4058 motif mut half -                | CGACCTCCT <b>GT</b> AGATGCGC <b>AC</b> ACATTCT                        |
| <b>Circular permutation assay primers</b> |                                                                       |
| bending_1_fw                              | CTGGGCCTGCTGATCAGGCCGTTT                                              |
| bending_1_rev                             | GCGACCTCCTACAGATGCGCACAC                                              |
| bending_2_fw                              | GACACACCTTCTCCGAGCGGCTTG                                              |
| bending_2_rev                             | GTCGAGCTTCTCGCGGTTGAGCCG                                              |

|                       |                                       |
|-----------------------|---------------------------------------|
| bending_3_fw          | TGCGCTCGGGTTCGGCGCGGGCCT              |
| bending_3_rev         | ACTCGCTCTGACGGATGCGCGTGG              |
| bending_4_fw          | CACTGGGGTTCAGTGGATCTTCCC              |
| bending_4_rev         | GCTCTTCGTA <del>CTTC</del> GCGAGCAGAT |
| bending_5_fw          | GAGAATGTGTGCGCATCTGTAGGA              |
| bending_5_rev         | GAGCCACCCTTCCACATCGGGTAA              |
| <b>RT-PCR primers</b> |                                       |
| 4362 qPCR forw        | CCGAGGACATGCTGGAGGAG                  |
| 4362 qPCR rev         | CGTTGACCGACGGCATCTTC                  |
| 4328 qPCR forw        | CCGTTTCGACAAGGTCTTCA                  |
| 4328 qPCR rev         | GGACCTCCACGAACATGC                    |
| 4058 qPCR forw        | GACGCCCTCAAGGACCTG                    |
| 4058 qPCR rev         | TTCGTACTTCGCGAGCAGAT                  |
| 5589 qPCR forw        | CTCGGTGATGAGCCAGGT                    |
| 5589 qPCR rev         | CTGCAGCCCATCCTTGATGA                  |
| 3850 qPCR forw        | CTACGAGGAGATCGGCAAGA                  |
| 3850 qPCR rev         | TTGCCCTCTTCGATGAGCTT                  |
| 4361 qPCR forw        | CACCGACAAGCGCAAGCAG                   |
| 4361 qPCR rev         | GCACGACCCAGGAAAGGGA                   |
| 0698 qPCR forw        | CGTCATCGACAACGTGAAGA                  |
| 0698 qPCR rev         | GCCTGTTTGTAGTTGCCCTT                  |
| 5498 qPCR forw        | GACGGTCGAGTTCGAGATTG                  |
| 5498 qPCR rev         | GTGCAGGTCCAGTTCGATG                   |
| 6587 qPCR forw        | GAGCGCCTTCGTGAACAA                    |
| 6587 qPCR rev         | CTCATTCCC GCCGTGTTCG                  |
| 6483 qPCR forw        | GTCATCCTCTCGGTGCTCTC                  |
| 6483 qPCR rev         | CCCGTCTTGCCCTCAATGG                   |

\* Restriction sites are underlined and mutations introduced by site-directed mutagenesis are in bold.

## Supplementary References

- 1 Hourdel, V. *et al.* MEMHDX: an interactive tool to expedite the statistical validation and visualization of large HDX-MS datasets. *Bioinformatics* **32**, 3413-3419, doi:10.1093/bioinformatics/btw420 (2016).
- 2 Miertzschke, M. *et al.* Structural analysis of the Ras-like G protein MglA and its cognate GAP MglB and implications for bacterial polarity. *EMBO J* **30**, 4185-4197, doi:10.1038/emboj.2011.291 (2011).
- 3 Kaiser, D. Social gliding is correlated with the presence of pili in *Myxococcus xanthus*. *Proc Natl Acad Sci USA* **76**, 5952-5956, doi:10.1073/pnas.76.11.5952 (1979).
- 4 Skotnicka, D. *et al.* c-di-GMP regulates type IV pili-dependent-motility in *Myxococcus xanthus*. *J Bacteriol*, doi:10.1128/JB.00281-15 (2015).
- 5 Schumacher, D. & Søgaard-Andersen, L. Fluorescence live-cell imaging of the complete vegetative cell cycle of the slow-growing social bacterium *Myxococcus xanthus*. *J Vis Exp*, doi:10.3791/57860 (2018).
- 6 Julien, B., Kaiser, A. D. & Garza, A. Spatial control of cell differentiation in *Myxococcus xanthus*. *Proc Natl Acad Sci USA* **97**, 9098-9103, doi:10.1073/pnas.97.16.9098 (2000).
- 7 Jakovljevic, V., Leonardy, S., Hoppert, M. & Søgaard-Andersen, L. PilB and PilT are ATPases acting antagonistically in type IV pilus function in *Myxococcus xanthus*. *J Bacteriol* **190**, 2411-2421, doi:10.1128/JB.01793-07 (2008).
- 8 Wu, S. S. & Kaiser, D. Genetic and functional evidence that type-IV pili are required for social gliding motility in *Myxococcus xanthus*. *Mol Microbiol* **18**, 547-558, doi:10.1111/j.1365-2958.1995.mmi\_18030547.x (1995).
- 9 Iniesta, A. A., Garcia-Heras, F., Abellon-Ruiz, J., Gallego-Garcia, A. & Elias-Arnanz, M. Two systems for conditional gene expression in *Myxococcus xanthus* inducible by isopropyl-beta-D-thiogalactopyranoside or vanillate. *J Bacteriol* **194**, 5875-5885, doi:10.1128/JB.01110-12 (2012).
- 10 Treuner-Lange, A. *et al.* PomZ, a ParA-like protein, regulates Z-ring formation and cell division in *Myxococcus xanthus*. *Mol Microbiol* **87**, 235-253, doi:10.1111/mmi.12094 (2013).
