# Supplementary material for: CdbA is a DNA-binding protein and c-di-GMP receptor important for nucleoid organization and segregation in Myxococcus xanthus
Source: Springer Nature journal article supplement (doi:10.1038/s41467-020-15628-8), 2020-04-14
Supplement: MOESM6 [file 41467_2020_15628_MOESM6_ESM.pdf]

## Reporting Summary

Nature Research wishes to improve the reproducibility of the work that we publish. This form provides structure for consistency and transparency in reporting. For further information on Nature Research policies, see [Authors & Referees](#) and the [Editorial Policy Checklist](#).

### Statistics

For all statistical analyses, confirm that the following items are present in the figure legend, table legend, main text, or Methods section.

n/a Confirmed

- |                                     |                                     |                                                                                                                                                                                                                                                            |
|-------------------------------------|-------------------------------------|------------------------------------------------------------------------------------------------------------------------------------------------------------------------------------------------------------------------------------------------------------|
| <input type="checkbox"/>            | <input checked="" type="checkbox"/> | The exact sample size ( $n$ ) for each experimental group/condition, given as a discrete number and unit of measurement                                                                                                                                    |
| <input type="checkbox"/>            | <input checked="" type="checkbox"/> | A statement on whether measurements were taken from distinct samples or whether the same sample was measured repeatedly                                                                                                                                    |
| <input type="checkbox"/>            | <input checked="" type="checkbox"/> | The statistical test(s) used AND whether they are one- or two-sided<br><i>Only common tests should be described solely by name; describe more complex techniques in the Methods section.</i>                                                               |
| <input checked="" type="checkbox"/> | <input type="checkbox"/>            | A description of all covariates tested                                                                                                                                                                                                                     |
| <input checked="" type="checkbox"/> | <input type="checkbox"/>            | A description of any assumptions or corrections, such as tests of normality and adjustment for multiple comparisons                                                                                                                                        |
| <input type="checkbox"/>            | <input checked="" type="checkbox"/> | A full description of the statistical parameters including central tendency (e.g. means) or other basic estimates (e.g. regression coefficient) AND variation (e.g. standard deviation) or associated estimates of uncertainty (e.g. confidence intervals) |
| <input type="checkbox"/>            | <input checked="" type="checkbox"/> | For null hypothesis testing, the test statistic (e.g. $F$ , $t$ , $r$ ) with confidence intervals, effect sizes, degrees of freedom and $P$ value noted<br><i>Give <math>P</math> values as exact values whenever suitable.</i>                            |
| <input checked="" type="checkbox"/> | <input type="checkbox"/>            | For Bayesian analysis, information on the choice of priors and Markov chain Monte Carlo settings                                                                                                                                                           |
| <input checked="" type="checkbox"/> | <input type="checkbox"/>            | For hierarchical and complex designs, identification of the appropriate level for tests and full reporting of outcomes                                                                                                                                     |
| <input checked="" type="checkbox"/> | <input type="checkbox"/>            | Estimates of effect sizes (e.g. Cohen's $d$ , Pearson's $r$ ), indicating how they were calculated                                                                                                                                                         |

*Our web collection on [statistics for biologists](#) contains articles on many of the points above.*

### Software and code

Policy information about [availability of computer code](#)

|                 |                                                                                                                                                                                                                                                                                                                                                                                                                                                                                                                                                                                                                                                                                                                      |
|-----------------|----------------------------------------------------------------------------------------------------------------------------------------------------------------------------------------------------------------------------------------------------------------------------------------------------------------------------------------------------------------------------------------------------------------------------------------------------------------------------------------------------------------------------------------------------------------------------------------------------------------------------------------------------------------------------------------------------------------------|
| Data collection | Leica Application Suite X 3.4.2.18368, Leica MM AF 1.8.0, Image Reader LAS-4000 v2.0, STORM Scanner Control v5.0, Typhoon Scanner Control v5.0, Fast Real-Time PCR 7500 Software v2.3, Xia2 (Winter, 2010)                                                                                                                                                                                                                                                                                                                                                                                                                                                                                                           |
| Data analysis   | Fiji (Schindelin et al., 2012), MetaMorph 7.7.5.0, Oufiti (Paintdakhi et al., 2016), MATLAB R2016b, Sigmaplot 12.5, Microsoft Excel 2013, MEGA 7.0.26 (Kumar et al., 2016), EMBOSS Needle (Li et al., 2015), NITPIC 1.2.274 (Scheuerman et al., 2015), SEDPHAT 12.1b75 (Brautigam et al., 2016), GUSI 1.3.276 (Brautigam et al., 2015), PLGS (Waters), DynamX 3.0 (Waters), PHENIX (Adams et al., 2010), COOT (Emsley et al., 2010), PDB-REDO (Joosten et al., 2014), CLC workbench 12.0 (Qiagen), samtools (option 'mpileup', Version 1.9, Li, 2009).<br>The MATLAB scripts used in the analysis of images from fluorescence microscopy and ChIP-seq data are available from the corresponding author upon request. |

For manuscripts utilizing custom algorithms or software that are central to the research but not yet described in published literature, software must be made available to editors/reviewers. We strongly encourage code deposition in a community repository (e.g. GitHub). See the Nature Research [guidelines for submitting code & software](#) for further information.

### Data

Policy information about [availability of data](#)

All manuscripts must include a [data availability statement](#). This statement should provide the following information, where applicable:

- Accession codes, unique identifiers, or web links for publicly available datasets
- A list of figures that have associated raw data
- A description of any restrictions on data availability

Co-ordinates and structure factors have been deposited with the RCSB: accession codes of 6SBW (form one) and 6SBX (form two). The ArrayExpress accession number for the ChIP-seq experiment is E-MTAB-8535. The PRIDE accession number for the HDX experiment is PXD018028. The source data underlying Figures 1b,d, 4a,c,d,e, 6a,c,d, 7a-e, 8a,c and Supplementary Figures 3b-d, 4a,d,e, 5, 6b, 7a, 8a,b are provided as a Source Data file.

## Field-specific reporting

Please select the one below that is the best fit for your research. If you are not sure, read the appropriate sections before making your selection.

- Life sciences       Behavioural & social sciences       Ecological, evolutionary & environmental sciences

For a reference copy of the document with all sections, see [nature.com/documents/nr-reporting-summary-flat.pdf](https://www.nature.com/documents/nr-reporting-summary-flat.pdf)

## Life sciences study design

All studies must disclose on these points even when the disclosure is negative.

|                 |                                                                                                                                                                                                                                                                                                                                                                                                                                                          |
|-----------------|----------------------------------------------------------------------------------------------------------------------------------------------------------------------------------------------------------------------------------------------------------------------------------------------------------------------------------------------------------------------------------------------------------------------------------------------------------|
| Sample size     | No statistical methods were used to determine sample sizes. Sample size was based on our standard practice and increasing the sample size did not change the outcome of the experiments. Hypothesis testing indicated significant differences between conditions/strains and therefore no further data was acquired. Further data acquisition was not performed with the aim of achieving statistical significance for small differences in the results. |
| Data exclusions | No data were excluded.                                                                                                                                                                                                                                                                                                                                                                                                                                   |
| Replication     | All experiments were successfully replicated. The nature and number of replicates is indicated in the corresponding figure legend. Informations provided in Material and Methods section are sufficient to reproduce all the experiments. All single cell data presented is representative of the population.                                                                                                                                            |
| Randomization   | All single cell experiments were based on a random cells selection and thus no further data randomization was required.                                                                                                                                                                                                                                                                                                                                  |
| Blinding        | No blinding was performed because the acquisition and analysis required human intervention.                                                                                                                                                                                                                                                                                                                                                              |

## Reporting for specific materials, systems and methods

We require information from authors about some types of materials, experimental systems and methods used in many studies. Here, indicate whether each material, system or method listed is relevant to your study. If you are not sure if a list item applies to your research, read the appropriate section before selecting a response.

### Materials & experimental systems

| n/a                                 | Involvement in the study                             |
|-------------------------------------|------------------------------------------------------|
| <input type="checkbox"/>            | <input checked="" type="checkbox"/> Antibodies       |
| <input checked="" type="checkbox"/> | <input type="checkbox"/> Eukaryotic cell lines       |
| <input checked="" type="checkbox"/> | <input type="checkbox"/> Palaeontology               |
| <input checked="" type="checkbox"/> | <input type="checkbox"/> Animals and other organisms |
| <input checked="" type="checkbox"/> | <input type="checkbox"/> Human research participants |
| <input checked="" type="checkbox"/> | <input type="checkbox"/> Clinical data               |

### Methods

| n/a                                 | Involvement in the study                        |
|-------------------------------------|-------------------------------------------------|
| <input type="checkbox"/>            | <input checked="" type="checkbox"/> ChIP-seq    |
| <input checked="" type="checkbox"/> | <input type="checkbox"/> Flow cytometry         |
| <input checked="" type="checkbox"/> | <input type="checkbox"/> MRI-based neuroimaging |

## Antibodies

|                 |                                                                                                                                                                                                                                                                                                                                                                                                                                                                                                                                                                                                                                                                                                                                                                                                                                    |
|-----------------|------------------------------------------------------------------------------------------------------------------------------------------------------------------------------------------------------------------------------------------------------------------------------------------------------------------------------------------------------------------------------------------------------------------------------------------------------------------------------------------------------------------------------------------------------------------------------------------------------------------------------------------------------------------------------------------------------------------------------------------------------------------------------------------------------------------------------------|
| Antibodies used | Antibodies used in this study include:<br>Rabbit polyclonal anti-FLAG antibody (Rockland, 600-401-383) (dilution 1:2000)<br>Rabbit polyclonal anti-mCherry antibody (Biovision, 5993-100) (dilution 1:10000)<br>Rabbit polyclonal anti-PilC antibody (dilution 1:5000) (Bulyha et al., 2009)<br>Secondary goat anti-rabbit IgG-peroxidase antibody (Sigma-Aldrich, A9044) (dilution 1:10000)                                                                                                                                                                                                                                                                                                                                                                                                                                       |
| Validation      | Data provided in the manuscript confirmed specificity of used antibodies, $\alpha$ -mCherry specifically reacts with CdbA-mCherry, CdbA K8A/S10A-mCherry and CdbA R27A/R30A-mCherry (Figure 4d and 7d); $\alpha$ -FLAG with His6-CdbA-3xFLAG and CdbA-3xFLAG (Supplementary Figure 4e), $\alpha$ -PilC with PilC (validation provided by Bulyha et al., 2009)<br><br>Antibodies specificity was also confirmed by the manufacturer:<br>$\alpha$ -mCherry ( <a href="https://www.biovision.com/mcherry-antibody.html">https://www.biovision.com/mcherry-antibody.html</a> )<br>$\alpha$ -FLAG ( <a href="https://rockland-inc.com/store/Antibodies-to-FLAG-and-Antibodies-to-6XHIS-Tags-600-401-383-O4L_23854.aspx">https://rockland-inc.com/store/Antibodies-to-FLAG-and-Antibodies-to-6XHIS-Tags-600-401-383-O4L_23854.aspx</a> ) |

## Data deposition

Confirm that both raw and final processed data have been deposited in a public database such as [GEO](#).

Confirm that you have deposited or provided access to graph files (e.g. BED files) for the called peaks.

## Data access links

*May remain private before publication.*

<http://www.ebi.ac.uk/arrayexpress/experiments/E-MTAB-8535>

## Files in database submission

4043\_WT1\_run579\_TACATCGG\_S182\_L002\_R1.fastq.gz  
 4043\_WT1\_run579\_TACATCGG\_S182\_L002\_R2.fastq.gz  
 4043\_WT2\_run579\_ATCGTCTC\_S183\_L002\_R1.fastq.gz  
 4043\_WT2\_run579\_ATCGTCTC\_S183\_L002\_R2.fastq.gz  
 4043\_CdbA1\_run579\_CCAACACT\_S184\_L002\_R1.fastq.gz  
 4043\_CdbA1\_run579\_CCAACACT\_S184\_L002\_R2.fastq.gz  
 4043\_CdbA2\_run579\_TCTAGGAG\_S185\_L002\_R1.fastq.gz  
 4043\_CdbA2\_run579\_TCTAGGAG\_S185\_L002\_R2.fastq.gz  
 4043\_ParB1\_run579\_CTCGAACA\_S186\_L002\_R1.fastq.gz  
 4043\_ParB1\_run579\_CTCGAACA\_S186\_L002\_R2.fastq.gz  
 4043\_ParB2\_run579\_ACGGACTT\_S187\_L002\_R1.fastq.gz  
 4043\_ParB2\_run579\_ACGGACTT\_S187\_L002\_R2.fastq.gz  
 4043\_input\_WT\_run579\_CTAAGACC\_S188\_L002\_R1.fastq.gz  
 4043\_input\_WT\_run579\_CTAAGACC\_S188\_L002\_R2.fastq.gz  
 4043\_input\_CdbA\_run579\_AACCGAAC\_S189\_L002\_R1.fastq.gz  
 4043\_input\_CdbA\_run579\_AACCGAAC\_S189\_L002\_R2.fastq.gz  
 4043\_input\_ParB\_run579\_CCTTAGGT\_S190\_L002\_R1.fastq.gz  
 4043\_input\_ParB\_run579\_CCTTAGGT\_S190\_L002\_R2.fastq.gz  
 4043\_WT1\_run579\_paired\_trimmed\_dedup.bam  
 4043\_WT1\_run579\_paired\_trimmed\_dedup.bam  
 4043\_WT2\_run579\_paired\_trimmed\_dedup.bam  
 4043\_WT2\_run579\_paired\_trimmed\_dedup.bam  
 4043\_CdbA1\_run579\_paired\_trimmed\_dedup.bam  
 4043\_CdbA1\_run579\_paired\_trimmed\_dedup.bam  
 4043\_CdbA2\_run579\_paired\_trimmed\_dedup.bam  
 4043\_CdbA2\_run579\_paired\_trimmed\_dedup.bam  
 4043\_ParB1\_run579\_paired\_trimmed\_dedup.bam  
 4043\_ParB1\_run579\_paired\_trimmed\_dedup.bam  
 4043\_ParB2\_run579\_paired\_trimmed\_dedup.bam  
 4043\_ParB2\_run579\_paired\_trimmed\_dedup.bam  
 4043\_input\_WT\_run579\_paired\_trimmed\_dedup.bam  
 4043\_input\_WT\_run579\_paired\_trimmed\_dedup.bam  
 4043\_input\_CdbA\_run579\_paired\_trimmed\_dedup.bam  
 4043\_input\_CdbA\_run579\_paired\_trimmed\_dedup.bam  
 4043\_input\_ParB\_run579\_paired\_trimmed\_dedup.bam  
 4043\_input\_ParB\_run579\_paired\_trimmed\_dedup.bam  
 reads\_WT1.txt  
 reads\_WT1.txt  
 reads\_WT2.txt  
 reads\_WT2.txt  
 reads\_CdbA1.txt  
 reads\_CdbA1.txt  
 reads\_CdbA2.txt  
 reads\_CdbA2.txt  
 reads\_ParB1.txt  
 reads\_ParB1.txt  
 reads\_ParB2.txt  
 reads\_ParB2.txt  
 reads\_input\_WT.txt  
 reads\_input\_WT.txt  
 reads\_input\_CdbA.txt  
 reads\_input\_CdbA.txt  
 reads\_input\_ParB.txt  
 reads\_input\_ParB.txt  
 4043\_WT1\_annotated\_peaks.bed  
 4043\_WT1\_annotated\_peaks.bed  
 4043\_WT2\_annotated\_peaks.bed

4043\_WT2\_annotated\_peaks.bed  
 4043\_CdbA1\_annotated\_peaks.bed  
 4043\_CdbA1\_annotated\_peaks.bed  
 4043\_CdbA2\_annotated\_peaks.bed  
 4043\_CdbA2\_annotated\_peaks.bed  
 4043\_ParB1\_annotated\_peaks.bed  
 4043\_ParB1\_annotated\_peaks.bed  
 4043\_ParB2\_annotated\_peaks.bed  
 4043\_ParB2\_annotated\_peaks.bed  
 enrichment\_log2\_WT1.txt  
 enrichment\_log2\_WT1.txt  
 enrichment\_log2\_WT2.txt  
 enrichment\_log2\_WT2.txt  
 enrichment\_log2\_CdbA1.txt  
 enrichment\_log2\_CdbA1.txt  
 enrichment\_log2\_CdbA2.txt  
 enrichment\_log2\_CdbA2.txt  
 enrichment\_log2\_ParB1.txt  
 enrichment\_log2\_ParB1.txt  
 enrichment\_log2\_ParB2.txt  
 enrichment\_log2\_ParB2.txt

Genome browser session  
 (e.g. [UCSC](#))

No longer applicable

## Methodology

Replicates

After chromatin shearing input aliquot was taken and each sample was split into two replicates for IP experiment.

Sequencing depth

2x150 bp, paired end read. On average about 3.5 million paired-end reads were collected for each sample.

Antibodies

Rabbit polyclonal anti-FLAG antibody (Rockland, 600-401-383)

Peak calling parameters

Peaks were identified using the CLC Genomics Workbench software (Qiagen) and sorted based on peak shape score. Peaks were considered significant if the enrichment in the IP sample over input was  $\geq 4$ -fold.

Data quality

After sequencing, only high-quality paired-end reads were used for mapping. Only appropriately mapped paired-end reads were used for downstream analysis. Only peaks with  $>4$  fold enrichment over input were analyzed.

Software

ChIP-seq signal enrichment across the genome was calculated with custom MATLAB scripts available on request.
