# Supplementary material for: CdbA is a DNA-binding protein and c-di-GMP receptor important for nucleoid organization and segregation in Myxococcus xanthus
Source: Nat Commun. 2020 Apr 14;11:1791. doi: 10.1038/s41467-020-15628-8 (PMC7156744; doi:10.1038/s41467-020-15628-8)
Supplement: Supplementary file 4 — Supplementary Data 1 [file 41467_2020_15628_MOESM4_ESM.xlsx]

## Sheet: Read me
Supplementary Data 1. Overview of data obtained by hydrogen-deuterium exchange mass spectrometry (HDX-MS).
Dataset 1	CdbA +- c-di-GMP
Conditions of H/D exchange	25 °C in 20 mM HEPESNa pH 7.5, 20 mM MgCl2, 20 mM KCl, 200 mM NaCl; final D2O = 90 %
Timecourse of H/D exchange	10/30/95/1000/10000 s
Replicates	3, technical (separate H/D exchange reactions measured)
Number of Peptides	68
Sequence coverage [%]	100
Redundancy	11.28
Significance criterium applied	0.5 Da (Houde et al., 2011)
Houde, D., Berkowitz, S.A., and Engen, J.R. (2011). The utility of hydrogen/deuterium exchange mass spectrometry in biopharmaceutical comparability studies. Journal of pharmaceutical sciences 100, 2071-2086.

## Sheet: HDX
Protein state	Start	End	Peptide sequence	Maximum Uptake [Da]	Peptide mass [Da]	Retention time [min]	Retention time SD [min]	HDX time [s]	Uptake [Da]	Uptake SD [Da]
apo	1	17	MAGTDKRKQSLYFPEEM	15	2029.96	8.19817	0.018247	0	0	0
apo	1	17	MAGTDKRKQSLYFPEEM	15	2029.96	8.2175	0.00213	10	5.99948	0.086547
apo	1	17	MAGTDKRKQSLYFPEEM	15	2029.96	8.25005	0.011694	30	6.49129	0.042768
apo	1	17	MAGTDKRKQSLYFPEEM	15	2029.96	8.24696	0.004316	95	6.70688	0.060234
apo	1	17	MAGTDKRKQSLYFPEEM	15	2029.96	8.25795	0.00339	1000	6.97555	0.050213
apo	1	17	MAGTDKRKQSLYFPEEM	15	2029.96	8.2507	0.004202	10000	6.92247	0.07757
cDG	1	17	MAGTDKRKQSLYFPEEM	15	2029.96	8.18455	0.006196	0	0	0
cDG	1	17	MAGTDKRKQSLYFPEEM	15	2029.96	8.22784	0.022202	10	2.90305	0.166734
cDG	1	17	MAGTDKRKQSLYFPEEM	15	2029.96	8.26134	0.013813	30	3.42681	0.029038
cDG	1	17	MAGTDKRKQSLYFPEEM	15	2029.96	8.25005	0.01073	95	3.96628	0.036237
cDG	1	17	MAGTDKRKQSLYFPEEM	15	2029.96	8.25458	0.006185	1000	5.00843	0.098043
cDG	1	17	MAGTDKRKQSLYFPEEM	15	2029.96	8.25557	0.006087	10000	6.14789	0.040962
apo	3	13	GTDKRKQSLYF	10	1341.7	8.11993	0.015987	0	0	0
apo	3	13	GTDKRKQSLYF	10	1341.7	8.14498	0.000894	10	3.34202	0.054308
apo	3	13	GTDKRKQSLYF	10	1341.7	8.19207	0.016336	30	3.75618	0.023466
apo	3	13	GTDKRKQSLYF	10	1341.7	8.19748	0.00439	95	3.87609	0.044839
apo	3	13	GTDKRKQSLYF	10	1341.7	8.19918	0.005379	1000	4.27821	0.068921
apo	3	13	GTDKRKQSLYF	10	1341.7	8.19111	0.005476	10000	4.23684	0.08565
cDG	3	13	GTDKRKQSLYF	10	1341.7	8.10252	0.004308	0	0	0
cDG	3	13	GTDKRKQSLYF	10	1341.7	8.16117	0.028563	10	0.701585	0.045678
cDG	3	13	GTDKRKQSLYF	10	1341.7	8.19893	0.009997	30	0.948627	0.033112
cDG	3	13	GTDKRKQSLYF	10	1341.7	8.18898	0.012356	95	1.403	0.048883
cDG	3	13	GTDKRKQSLYF	10	1341.7	8.19499	0.00774	1000	2.40165	0.080418
cDG	3	13	GTDKRKQSLYF	10	1341.7	8.19452	0.005627	10000	3.50331	0.083123
apo	3	16	GTDKRKQSLYFPEE	12	1696.84	8.07694	0.01504	0	0	0
apo	3	16	GTDKRKQSLYFPEE	12	1696.84	8.09309	0.000187	10	4.55164	0.044378
apo	3	16	GTDKRKQSLYFPEE	12	1696.84	8.12834	0.010773	30	4.82703	0.088665
apo	3	16	GTDKRKQSLYFPEE	12	1696.84	8.12379	0.005818	95	5.14464	0.086755
apo	3	16	GTDKRKQSLYFPEE	12	1696.84	8.13205	0.000267	1000	5.42083	0.101635
apo	3	16	GTDKRKQSLYFPEE	12	1696.84	8.13091	0.001747	10000	5.42974	0.057393
cDG	3	16	GTDKRKQSLYFPEE	12	1696.84	8.05921	0.007712	0	0	0
cDG	3	16	GTDKRKQSLYFPEE	12	1696.84	8.09835	0.020959	10	1.55389	0.117149
cDG	3	16	GTDKRKQSLYFPEE	12	1696.84	8.13026	0.008242	30	2.01286	0.039733
cDG	3	16	GTDKRKQSLYFPEE	12	1696.84	8.12814	0.011763	95	2.47845	0.061725
cDG	3	16	GTDKRKQSLYFPEE	12	1696.84	8.1303	0.00561	1000	3.51537	0.037098
cDG	3	16	GTDKRKQSLYFPEE	12	1696.84	8.13886	0.006477	10000	4.44589	0.100749
apo	3	17	GTDKRKQSLYFPEEM	13	1827.88	8.68329	0.011144	0	0	0
apo	3	17	GTDKRKQSLYFPEEM	13	1827.88	8.71467	0.006622	10	5.06874	0.062295
apo	3	17	GTDKRKQSLYFPEEM	13	1827.88	8.7424	0.012502	30	5.60908	0.038802
apo	3	17	GTDKRKQSLYFPEEM	13	1827.88	8.74297	0.007301	95	5.83027	0.043008
apo	3	17	GTDKRKQSLYFPEEM	13	1827.88	8.74728	0.00464	1000	6.11946	0.036907
apo	3	17	GTDKRKQSLYFPEEM	13	1827.88	8.74053	0.008108	10000	6.0899	0.069097
cDG	3	17	GTDKRKQSLYFPEEM	13	1827.88	8.6645	0.002637	0	0	0
cDG	3	17	GTDKRKQSLYFPEEM	13	1827.88	8.72533	0.023113	10	1.82339	0.124533
cDG	3	17	GTDKRKQSLYFPEEM	13	1827.88	8.74583	0.005949	30	2.40214	0.023852
cDG	3	17	GTDKRKQSLYFPEEM	13	1827.88	8.74174	0.007234	95	3.08637	0.040301
cDG	3	17	GTDKRKQSLYFPEEM	13	1827.88	8.74804	0.005917	1000	4.169	0.073269
cDG	3	17	GTDKRKQSLYFPEEM	13	1827.88	8.74295	0.004761	10000	5.28093	0.041888
apo	3	18	GTDKRKQSLYFPEEML	14	1940.97	9.35655	0.004627	0	0	0
apo	3	18	GTDKRKQSLYFPEEML	14	1940.97	9.39374	0.004363	10	4.86053	0.104373
apo	3	18	GTDKRKQSLYFPEEML	14	1940.97	9.42819	0.010369	30	5.41449	0.035814
apo	3	18	GTDKRKQSLYFPEEML	14	1940.97	9.42898	0.006336	95	5.72898	0.083499
apo	3	18	GTDKRKQSLYFPEEML	14	1940.97	9.44146	0.007978	1000	6.04101	0.033357
apo	3	18	GTDKRKQSLYFPEEML	14	1940.97	9.43257	0.001961	10000	6.14079	0.066939
cDG	3	18	GTDKRKQSLYFPEEML	14	1940.97	9.34745	0.002199	0	0	0
cDG	3	18	GTDKRKQSLYFPEEML	14	1940.97	9.40273	0.020706	10	1.82691	0.121705
cDG	3	18	GTDKRKQSLYFPEEML	14	1940.97	9.43365	0.010142	30	2.40793	0.026287
cDG	3	18	GTDKRKQSLYFPEEML	14	1940.97	9.44766	0.025991	95	3.1116	0.046233
cDG	3	18	GTDKRKQSLYFPEEML	14	1940.97	9.43805	0.00831	1000	4.14001	0.036387
cDG	3	18	GTDKRKQSLYFPEEML	14	1940.97	9.43615	0.005639	10000	5.22112	0.087391
apo	9	23	QSLYFPEEMLKEIQE	13	1882.9	8.76634	0.006973	0	0	0
apo	9	23	QSLYFPEEMLKEIQE	13	1882.9	8.78321	0.002464	10	5.26819	0.084138
apo	9	23	QSLYFPEEMLKEIQE	13	1882.9	8.81898	0.013743	30	5.84224	0.066006
apo	9	23	QSLYFPEEMLKEIQE	13	1882.9	8.81832	0.002082	95	6.06944	0.068187
apo	9	23	QSLYFPEEMLKEIQE	13	1882.9	8.82852	0.002804	1000	6.29657	0.0192
apo	9	23	QSLYFPEEMLKEIQE	13	1882.9	8.81737	0.003483	10000	6.26647	0.098995
cDG	9	23	QSLYFPEEMLKEIQE	13	1882.9	8.74179	0.006189	0	0	0
cDG	9	23	QSLYFPEEMLKEIQE	13	1882.9	8.79448	0.022978	10	2.42027	0.116237
cDG	9	23	QSLYFPEEMLKEIQE	13	1882.9	8.82606	0.012181	30	2.96751	0.033043
cDG	9	23	QSLYFPEEMLKEIQE	13	1882.9	8.81681	0.006074	95	3.58548	0.034353
cDG	9	23	QSLYFPEEMLKEIQE	13	1882.9	8.82352	0.009301	1000	4.57892	0.055021
cDG	9	23	QSLYFPEEMLKEIQE	13	1882.9	8.82397	0.004115	10000	5.59211	0.054594
apo	12	17	YFPEEM	4	814.32	9.41652	0.001067	0	0	0
apo	12	17	YFPEEM	4	814.32	9.43659	0.001222	10	1.63958	0.014667
apo	12	17	YFPEEM	4	814.32	9.45014	0.013071	30	1.81966	0.015918
apo	12	17	YFPEEM	4	814.32	9.44789	0.008796	95	1.77318	0.02869
apo	12	17	YFPEEM	4	814.32	9.46491	0.003595	1000	1.76282	0.02998
apo	12	17	YFPEEM	4	814.32	9.45211	0.004167	10000	1.76118	0.017639
cDG	12	17	YFPEEM	4	814.32	9.41079	0.008163	0	0	0
cDG	12	17	YFPEEM	4	814.32	9.43978	0.015061	10	1.30295	0.074272
cDG	12	17	YFPEEM	4	814.32	9.45516	0.009565	30	1.58409	0.019603
cDG	12	17	YFPEEM	4	814.32	9.45058	0.00809	95	1.77567	0.02147
cDG	12	17	YFPEEM	4	814.32	9.46183	0.002865	1000	1.78139	0.032209
cDG	12	17	YFPEEM	4	814.32	9.46031	0.003296	10000	1.80704	0.024805
apo	14	17	PEEM	2	504.188	7.04347	0.018327	0	0	0
apo	14	17	PEEM	2	504.188	7.04993	0.009694	10	0.792237	0.040507
apo	14	17	PEEM	2	504.188	7.06499	0.010137	30	0.89971	0.028842
apo	14	17	PEEM	2	504.188	7.07007	0.005915	95	0.8674	0.029032
apo	14	17	PEEM	2	504.188	7.06835	0.002304	1000	0.867406	0.02852
apo	14	17	PEEM	2	504.188	7.06418	0.006109	10000	0.844431	0.035758
cDG	14	17	PEEM	2	504.188	7.0153	0.014986	0	0	0
cDG	14	17	PEEM	2	504.188	7.05447	0.01362	10	0.567739	0.031641
cDG	14	17	PEEM	2	504.188	7.07033	0.010259	30	0.672248	0.017525
cDG	14	17	PEEM	2	504.188	7.06324	0.023655	95	0.832667	0.019419
cDG	14	17	PEEM	2	504.188	7.06436	0.004515	1000	0.848068	0.018724
cDG	14	17	PEEM	2	504.188	7.07075	0.00631	10000	0.863309	0.021919
apo	14	18	PEEML	3	617.272	8.90529	0.007963	0	0	0
apo	14	18	PEEML	3	617.272	8.92314	0.001281	10	0.783531	0.026602
apo	14	18	PEEML	3	617.272	8.93611	0.01379	30	0.922679	0.019933
apo	14	18	PEEML	3	617.272	8.9403	0.001592	95	0.889972	0.031538
apo	14	18	PEEML	3	617.272	8.94659	0.000855	1000	0.9356	0.029568
apo	14	18	PEEML	3	617.272	8.93579	0.003267	10000	1.03471	0.018808
cDG	14	18	PEEML	3	617.272	8.89273	0.003307	0	0	0
cDG	14	18	PEEML	3	617.272	8.92807	0.015834	10	0.600938	0.030511
cDG	14	18	PEEML	3	617.272	8.9407	0.008967	30	0.726952	0.017042
cDG	14	18	PEEML	3	617.272	8.93473	0.007327	95	0.882706	0.017408
cDG	14	18	PEEML	3	617.272	8.93798	0.00552	1000	0.894163	0.029228
cDG	14	18	PEEML	3	617.272	8.9389	0.006269	10000	0.956731	0.018627
apo	17	20	MLKE	3	519.272	6.23176	0.010133	0	0	0
apo	17	20	MLKE	3	519.272	6.24653	0.010187	10	0.072477	0.020984
apo	17	20	MLKE	3	519.272	6.27414	0.009913	30	0.084973	0.016832
apo	17	20	MLKE	3	519.272	6.28224	0.012017	95	0.110634	0.020202
apo	17	20	MLKE	3	519.272	6.28205	0.006137	1000	0.465613	0.016042
apo	17	20	MLKE	3	519.272	6.27795	0.008462	10000	1.08313	0.019449
cDG	17	20	MLKE	3	519.272	6.20138	0.020712	0	0	0
cDG	17	20	MLKE	3	519.272	6.2576	0.017508	10	0.015207	0.018082
cDG	17	20	MLKE	3	519.272	6.27941	0.014825	30	-0.00234	0.021993
cDG	17	20	MLKE	3	519.272	6.28279	0.035822	95	0.006818	0.020591
cDG	17	20	MLKE	3	519.272	6.27524	0.004561	1000	0.033103	0.021017
cDG	17	20	MLKE	3	519.272	6.27899	0.009056	10000	0.204655	0.016024
apo	17	23	MLKEIQE	6	889.457	7.45606	0.013876	0	0	0
apo	17	23	MLKEIQE	6	889.457	7.47097	0.001226	10	0.029361	0.022997
apo	17	23	MLKEIQE	6	889.457	7.49662	0.009295	30	0.091558	0.023618
apo	17	23	MLKEIQE	6	889.457	7.49721	0.00165	95	0.125227	0.017464
apo	17	23	MLKEIQE	6	889.457	7.49582	0.001149	1000	0.587217	0.018849
apo	17	23	MLKEIQE	6	889.457	7.4944	0.003417	10000	1.30659	0.031696
cDG	17	23	MLKEIQE	6	889.457	7.44245	0.009308	0	0	0
cDG	17	23	MLKEIQE	6	889.457	7.47993	0.015655	10	0.012301	0.031275
cDG	17	23	MLKEIQE	6	889.457	7.49826	0.009772	30	0.022854	0.025666
cDG	17	23	MLKEIQE	6	889.457	7.49526	0.011759	95	0.023907	0.025437
cDG	17	23	MLKEIQE	6	889.457	7.49397	0.004682	1000	0.068196	0.027479
cDG	17	23	MLKEIQE	6	889.457	7.49893	0.004171	10000	0.27092	0.025327
apo	17	30	MLKEIQEEATRQDR	13	1745.87	7.44383	0.014339	0	0	0
apo	17	30	MLKEIQEEATRQDR	13	1745.87	7.45516	0.001747	10	0.107437	0.041907
apo	17	30	MLKEIQEEATRQDR	13	1745.87	7.47475	0.009112	30	0.08569	0.028909
apo	17	30	MLKEIQEEATRQDR	13	1745.87	7.47749	0.002362	95	0.131332	0.026532
apo	17	30	MLKEIQEEATRQDR	13	1745.87	7.47292	0.00134	1000	0.746634	0.028413
apo	17	30	MLKEIQEEATRQDR	13	1745.87	7.46943	0.002684	10000	2.35262	0.089458
cDG	17	30	MLKEIQEEATRQDR	13	1745.87	7.42737	0.006965	0	0	0
cDG	17	30	MLKEIQEEATRQDR	13	1745.87	7.46033	0.013943	10	0.020125	0.022328
cDG	17	30	MLKEIQEEATRQDR	13	1745.87	7.48114	0.009205	30	-0.011996	0.033201
cDG	17	30	MLKEIQEEATRQDR	13	1745.87	7.47738	0.011821	95	0.00578	0.040586
cDG	17	30	MLKEIQEEATRQDR	13	1745.87	7.47519	0.003936	1000	0.113057	0.01493
cDG	17	30	MLKEIQEEATRQDR	13	1745.87	7.47951	0.004803	10000	0.643618	0.022192
apo	17	33	MLKEIQEEATRQDRSLS	16	2033.02	7.89424	0.014258	0	0	0
apo	17	33	MLKEIQEEATRQDRSLS	16	2033.02	7.90219	0.000909	10	1.63391	0.030521
apo	17	33	MLKEIQEEATRQDRSLS	16	2033.02	7.91627	0.008865	30	1.89707	0.016876
apo	17	33	MLKEIQEEATRQDRSLS	16	2033.02	7.91676	0.003613	95	1.98142	0.024329
apo	17	33	MLKEIQEEATRQDRSLS	16	2033.02	7.91704	0.002119	1000	2.64606	0.035038
apo	17	33	MLKEIQEEATRQDRSLS	16	2033.02	7.91028	0.002844	10000	4.36952	0.060628
cDG	17	33	MLKEIQEEATRQDRSLS	16	2033.02	7.87981	0.005715	0	0	0
cDG	17	33	MLKEIQEEATRQDRSLS	16	2033.02	7.90984	0.01293	10	0.191136	0.02894
cDG	17	33	MLKEIQEEATRQDRSLS	16	2033.02	7.92508	0.009805	30	0.249161	0.037296
cDG	17	33	MLKEIQEEATRQDRSLS	16	2033.02	7.92136	0.008658	95	0.444387	0.034043
cDG	17	33	MLKEIQEEATRQDRSLS	16	2033.02	7.91779	0.00454	1000	1.27555	0.029838
cDG	17	33	MLKEIQEEATRQDRSLS	16	2033.02	7.91896	0.005623	10000	2.21132	0.067347
apo	18	23	LKEIQE	5	758.417	6.79286	0.021251	0	0	0
apo	18	23	LKEIQE	5	758.417	6.80113	0.002315	10	0.057872	0.010158
apo	18	23	LKEIQE	5	758.417	6.82197	0.010021	30	0.07679	0.011426
apo	18	23	LKEIQE	5	758.417	6.82825	0.003702	95	0.096886	0.014491
apo	18	23	LKEIQE	5	758.417	6.82567	0.002978	1000	0.338911	0.015752
apo	18	23	LKEIQE	5	758.417	6.82498	0.003374	10000	0.599107	0.016349
cDG	18	23	LKEIQE	5	758.417	6.77446	0.008452	0	0	0
cDG	18	23	LKEIQE	5	758.417	6.81242	0.01464	10	0.068627	0.035691
cDG	18	23	LKEIQE	5	758.417	6.82727	0.01041	30	0.066837	0.034083
cDG	18	23	LKEIQE	5	758.417	6.82899	0.015843	95	0.043276	0.033384
cDG	18	23	LKEIQE	5	758.417	6.82283	0.003946	1000	0.095773	0.032821
cDG	18	23	LKEIQE	5	758.417	6.82826	0.005933	10000	0.098226	0.03707
apo	18	24	LKEIQEE	6	887.459	6.82627	0.021892	0	0	0
apo	18	24	LKEIQEE	6	887.459	6.83276	0.002598	10	0.049552	0.014585
apo	18	24	LKEIQEE	6	887.459	6.85253	0.010024	30	0.072137	0.015651
apo	18	24	LKEIQEE	6	887.459	6.85768	0.003512	95	0.097578	0.012916
apo	18	24	LKEIQEE	6	887.459	6.85603	0.002384	1000	0.361065	0.018932
apo	18	24	LKEIQEE	6	887.459	6.8553	0.003216	10000	0.677536	0.027292
cDG	18	24	LKEIQEE	6	887.459	6.80705	0.007712	0	0	0
cDG	18	24	LKEIQEE	6	887.459	6.83934	0.013778	10	0.038497	0.009773
cDG	18	24	LKEIQEE	6	887.459	6.85766	0.011596	30	0.038017	0.011363
cDG	18	24	LKEIQEE	6	887.459	6.8567	0.015777	95	0.04903	0.00943
cDG	18	24	LKEIQEE	6	887.459	6.85345	0.003545	1000	0.046075	0.009999
cDG	18	24	LKEIQEE	6	887.459	6.85949	0.006238	10000	0.101256	0.011072
apo	18	30	LKEIQEEATRQDR	12	1614.83	6.41827	0.015215	0	0	0
apo	18	30	LKEIQEEATRQDR	12	1614.83	6.4269	0.003186	10	0.057514	0.020734
apo	18	30	LKEIQEEATRQDR	12	1614.83	6.44197	0.00815	30	-5e-05	0.028877
apo	18	30	LKEIQEEATRQDR	12	1614.83	6.45244	0.002542	95	0.022214	0.010774
apo	18	30	LKEIQEEATRQDR	12	1614.83	6.44706	0.001474	1000	0.364981	0.020819
apo	18	30	LKEIQEEATRQDR	12	1614.83	6.44259	0.003458	10000	1.56656	0.036009
cDG	18	30	LKEIQEEATRQDR	12	1614.83	6.40237	0.009911	0	0	0
cDG	18	30	LKEIQEEATRQDR	12	1614.83	6.43087	0.015238	10	0.020043	0.025208
cDG	18	30	LKEIQEEATRQDR	12	1614.83	6.44892	0.013885	30	-0.031893	0.020519
cDG	18	30	LKEIQEEATRQDR	12	1614.83	6.45335	0.013775	95	-0.032144	0.018366
cDG	18	30	LKEIQEEATRQDR	12	1614.83	6.44612	0.00358	1000	0.043998	0.017535
cDG	18	30	LKEIQEEATRQDR	12	1614.83	6.44987	0.005302	10000	0.37194	0.035725
apo	18	33	LKEIQEEATRQDRSLS	15	1901.98	6.97907	0.01554	0	0	0
apo	18	33	LKEIQEEATRQDRSLS	15	1901.98	6.98761	0.003464	10	1.81448	0.037531
apo	18	33	LKEIQEEATRQDRSLS	15	1901.98	7.0107	0.010272	30	2.06217	0.033344
apo	18	33	LKEIQEEATRQDRSLS	15	1901.98	7.01282	0.003338	95	2.16544	0.039082
apo	18	33	LKEIQEEATRQDRSLS	15	1901.98	7.0111	0.000452	1000	2.57728	0.045632
apo	18	33	LKEIQEEATRQDRSLS	15	1901.98	7.00759	0.002594	10000	3.76039	0.033796
cDG	18	33	LKEIQEEATRQDRSLS	15	1901.98	6.96195	0.010708	0	0	0
cDG	18	33	LKEIQEEATRQDRSLS	15	1901.98	6.99883	0.0146	10	0.201071	0.030537
cDG	18	33	LKEIQEEATRQDRSLS	15	1901.98	7.01776	0.009542	30	0.302215	0.018112
cDG	18	33	LKEIQEEATRQDRSLS	15	1901.98	7.00993	0.012496	95	0.495599	0.030771
cDG	18	33	LKEIQEEATRQDRSLS	15	1901.98	7.01122	0.003016	1000	1.37843	0.043437
cDG	18	33	LKEIQEEATRQDRSLS	15	1901.98	7.01434	0.005284	10000	2.2059	0.075546
apo	18	34	LKEIQEEATRQDRSLSW	16	2088.06	8.30742	0.014499	0	0	0
apo	18	34	LKEIQEEATRQDRSLSW	16	2088.06	8.32383	0.002161	10	1.62705	0.041155
apo	18	34	LKEIQEEATRQDRSLSW	16	2088.06	8.36059	0.013218	30	1.8497	0.016414
apo	18	34	LKEIQEEATRQDRSLSW	16	2088.06	8.3612	0.003365	95	1.96646	0.024125
apo	18	34	LKEIQEEATRQDRSLSW	16	2088.06	8.36585	0.002596	1000	2.78676	0.015695
apo	18	34	LKEIQEEATRQDRSLSW	16	2088.06	8.35774	0.00411	10000	4.16229	0.088194
cDG	18	34	LKEIQEEATRQDRSLSW	16	2088.06	8.28936	0.00428	0	0	0
cDG	18	34	LKEIQEEATRQDRSLSW	16	2088.06	8.3365	0.024431	10	0.133336	0.015489
cDG	18	34	LKEIQEEATRQDRSLSW	16	2088.06	8.36768	0.008656	30	0.164712	0.017206
cDG	18	34	LKEIQEEATRQDRSLSW	16	2088.06	8.35911	0.007266	95	0.344517	0.026372
cDG	18	34	LKEIQEEATRQDRSLSW	16	2088.06	8.363	0.008605	1000	1.2008	0.033888
cDG	18	34	LKEIQEEATRQDRSLSW	16	2088.06	8.36276	0.006963	10000	2.15129	0.074524
apo	19	23	KEIQE	4	645.333	6.79083	0.017131	0	0	0
apo	19	23	KEIQE	4	645.333	6.79654	0.002248	10	0.008509	0.016847
apo	19	23	KEIQE	4	645.333	6.81645	0.011249	30	0.059217	0.019766
apo	19	23	KEIQE	4	645.333	6.82502	0.00323	95	0.078917	0.010789
apo	19	23	KEIQE	4	645.333	6.82152	0.003432	1000	0.314313	0.018559
apo	19	23	KEIQE	4	645.333	6.82111	0.00255	10000	0.552443	0.014576
cDG	19	23	KEIQE	4	645.333	6.77146	0.007134	0	0	0
cDG	19	23	KEIQE	4	645.333	6.80518	0.014515	10	0.027531	0.01796
cDG	19	23	KEIQE	4	645.333	6.82205	0.010169	30	0.048422	0.020854
cDG	19	23	KEIQE	4	645.333	6.82626	0.014396	95	0.050322	0.017284
cDG	19	23	KEIQE	4	645.333	6.81866	0.004493	1000	0.062183	0.023201
cDG	19	23	KEIQE	4	645.333	6.82305	0.00468	10000	0.111038	0.020543
apo	19	33	KEIQEEATRQDRSLS	14	1788.9	6.43573	0.016253	0	0	0
apo	19	33	KEIQEEATRQDRSLS	14	1788.9	6.44241	0.002035	10	1.80202	0.03677
apo	19	33	KEIQEEATRQDRSLS	14	1788.9	6.45138	0.006856	30	2.07032	0.044594
apo	19	33	KEIQEEATRQDRSLS	14	1788.9	6.4646	0.001082	95	2.093	0.04618
apo	19	33	KEIQEEATRQDRSLS	14	1788.9	6.46185	0.003318	1000	2.32833	0.037345
apo	19	33	KEIQEEATRQDRSLS	14	1788.9	6.45811	0.00257	10000	3.39411	0.046117
cDG	19	33	KEIQEEATRQDRSLS	14	1788.9	6.42215	0.010158	0	0	0
cDG	19	33	KEIQEEATRQDRSLS	14	1788.9	6.44646	0.015009	10	0.276682	0.059301
cDG	19	33	KEIQEEATRQDRSLS	14	1788.9	6.4634	0.011174	30	0.399611	0.038093
cDG	19	33	KEIQEEATRQDRSLS	14	1788.9	6.46802	0.01324	95	0.602191	0.04527
cDG	19	33	KEIQEEATRQDRSLS	14	1788.9	6.45936	0.003114	1000	1.39715	0.063031
cDG	19	33	KEIQEEATRQDRSLS	14	1788.9	6.46252	0.005035	10000	2.15165	0.050242
apo	19	34	KEIQEEATRQDRSLSW	15	1974.98	8.09509	0.017411	0	0	0
apo	19	34	KEIQEEATRQDRSLSW	15	1974.98	8.11159	0.00082	10	1.81435	0.056333
apo	19	34	KEIQEEATRQDRSLSW	15	1974.98	8.15221	0.012016	30	2.07267	0.05668
apo	19	34	KEIQEEATRQDRSLSW	15	1974.98	8.15322	0.005933	95	2.19274	0.045903
apo	19	34	KEIQEEATRQDRSLSW	15	1974.98	8.16077	0.005669	1000	2.80349	0.043373
apo	19	34	KEIQEEATRQDRSLSW	15	1974.98	8.15358	0.00404	10000	4.09284	0.078317
cDG	19	34	KEIQEEATRQDRSLSW	15	1974.98	8.07797	0.006932	0	0	0
cDG	19	34	KEIQEEATRQDRSLSW	15	1974.98	8.12196	0.024747	10	0.199979	0.028257
cDG	19	34	KEIQEEATRQDRSLSW	15	1974.98	8.1616	0.013427	30	0.316531	0.026784
cDG	19	34	KEIQEEATRQDRSLSW	15	1974.98	8.15466	0.012169	95	0.520005	0.057527
cDG	19	34	KEIQEEATRQDRSLSW	15	1974.98	8.15783	0.008051	1000	1.37063	0.050302
cDG	19	34	KEIQEEATRQDRSLSW	15	1974.98	8.16008	0.005152	10000	2.35816	0.083969
apo	21	33	IQEEATRQDRSLS	12	1531.76	6.40935	0.016173	0	0	0
apo	21	33	IQEEATRQDRSLS	12	1531.76	6.4107	0.002146	10	1.73937	0.044732
apo	21	33	IQEEATRQDRSLS	12	1531.76	6.42352	0.005054	30	2.01741	0.037404
apo	21	33	IQEEATRQDRSLS	12	1531.76	6.43533	0.002662	95	2.02884	0.032345
apo	21	33	IQEEATRQDRSLS	12	1531.76	6.43337	0.001611	1000	2.2928	0.040565
apo	21	33	IQEEATRQDRSLS	12	1531.76	6.43135	0.003265	10000	3.31139	0.042092
cDG	21	33	IQEEATRQDRSLS	12	1531.76	6.39361	0.009802	0	0	0
cDG	21	33	IQEEATRQDRSLS	12	1531.76	6.41983	0.013308	10	0.244339	0.035107
cDG	21	33	IQEEATRQDRSLS	12	1531.76	6.43386	0.012083	30	0.359488	0.035899
cDG	21	33	IQEEATRQDRSLS	12	1531.76	6.4386	0.015862	95	0.542016	0.037629
cDG	21	33	IQEEATRQDRSLS	12	1531.76	6.42968	0.003912	1000	1.31741	0.042961
cDG	21	33	IQEEATRQDRSLS	12	1531.76	6.43346	0.007245	10000	2.06206	0.091779
apo	24	33	EATRQDRSLS	9	1161.57	5.27668	0.062436	0	0	0
apo	24	33	EATRQDRSLS	9	1161.57	5.32447	0.146197	10	1.61318	0.087612
apo	24	33	EATRQDRSLS	9	1161.57	5.4779	0.032642	30	1.8606	0.086529
apo	24	33	EATRQDRSLS	9	1161.57	5.46505	0.23191	95	1.84387	0.095453
apo	24	33	EATRQDRSLS	9	1161.57	5.55035	0.133561	1000	2.03956	0.083847
apo	24	33	EATRQDRSLS	9	1161.57	5.43396	0.197671	10000	2.84907	0.085653
cDG	24	33	EATRQDRSLS	9	1161.57	5.19381	0.09542	0	0	0
cDG	24	33	EATRQDRSLS	9	1161.57	5.45448	0.091164	10	0.287854	0.078258
cDG	24	33	EATRQDRSLS	9	1161.57	5.4782	0.143261	30	0.407691	0.081799
cDG	24	33	EATRQDRSLS	9	1161.57	5.22219	0.192758	95	0.45956	0.06014
cDG	24	33	EATRQDRSLS	9	1161.57	5.24739	0.112065	1000	1.20235	0.072488
cDG	24	33	EATRQDRSLS	9	1161.57	5.47456	0.165376	10000	1.88153	0.0768
apo	29	34	DRSLSW	5	762.365	9.00062	0.010499	0	0	0
apo	29	34	DRSLSW	5	762.365	9.02256	0.001561	10	1.76979	0.038922
apo	29	34	DRSLSW	5	762.365	9.04322	0.011935	30	2.00972	0.015887
apo	29	34	DRSLSW	5	762.365	9.04467	0.003745	95	2.05133	0.026174
apo	29	34	DRSLSW	5	762.365	9.05625	0.00167	1000	2.46323	0.038195
apo	29	34	DRSLSW	5	762.365	9.04428	0.006539	10000	2.69458	0.070495
cDG	29	34	DRSLSW	5	762.365	8.98467	0.004601	0	0	0
cDG	29	34	DRSLSW	5	762.365	9.03002	0.019543	10	0.207703	0.034358
cDG	29	34	DRSLSW	5	762.365	9.04813	0.009852	30	0.290414	0.025583
cDG	29	34	DRSLSW	5	762.365	9.04243	0.007336	95	0.481478	0.02306
cDG	29	34	DRSLSW	5	762.365	9.04935	0.007526	1000	1.26513	0.050539
cDG	29	34	DRSLSW	5	762.365	9.04921	0.004901	10000	1.82314	0.032913
apo	31	34	SLSW	3	491.237	9.74012	0.005321	0	0	0
apo	31	34	SLSW	3	491.237	9.76991	0.002177	10	0.55002	0.03425
apo	31	34	SLSW	3	491.237	9.78146	0.016187	30	0.559641	0.029209
apo	31	34	SLSW	3	491.237	9.78477	0.001933	95	0.590444	0.03519
apo	31	34	SLSW	3	491.237	9.79745	0.003281	1000	0.979239	0.030511
apo	31	34	SLSW	3	491.237	9.78554	0.003206	10000	1.22286	0.030218
cDG	31	34	SLSW	3	491.237	9.73901	0.004076	0	0	0
cDG	31	34	SLSW	3	491.237	9.77414	0.014596	10	-0.027887	0.049017
cDG	31	34	SLSW	3	491.237	9.78664	0.007908	30	-0.057066	0.033212
cDG	31	34	SLSW	3	491.237	9.78366	0.007118	95	-0.004458	0.036913
cDG	31	34	SLSW	3	491.237	9.78878	0.008098	1000	0.28169	0.031457
cDG	31	34	SLSW	3	491.237	9.79226	0.006418	10000	0.56974	0.034404
apo	31	46	SLSWVVQQAWKIARER	15	1956.07	10.1072	0.010758	0	0	0
apo	31	46	SLSWVVQQAWKIARER	15	1956.07	10.1393	0.003203	10	1.34767	0.028169
apo	31	46	SLSWVVQQAWKIARER	15	1956.07	10.1549	0.010972	30	1.52001	0.025439
apo	31	46	SLSWVVQQAWKIARER	15	1956.07	10.166	0.002499	95	1.62904	0.043918
apo	31	46	SLSWVVQQAWKIARER	15	1956.07	10.1811	0.003494	1000	1.99768	0.034003
apo	31	46	SLSWVVQQAWKIARER	15	1956.07	10.1768	0.003963	10000	2.21391	0.035611
cDG	31	46	SLSWVVQQAWKIARER	15	1956.07	10.11	0.000585	0	0	0
cDG	31	46	SLSWVVQQAWKIARER	15	1956.07	10.1444	0.019351	10	0.914849	0.037752
cDG	31	46	SLSWVVQQAWKIARER	15	1956.07	10.1693	0.005711	30	1.01565	0.039885
cDG	31	46	SLSWVVQQAWKIARER	15	1956.07	10.1669	0.002238	95	1.19123	0.034062
cDG	31	46	SLSWVVQQAWKIARER	15	1956.07	10.1751	0.006806	1000	1.36815	0.038348
cDG	31	46	SLSWVVQQAWKIARER	15	1956.07	10.1817	0.005774	10000	1.69274	0.050828
apo	34	37	WVVQ	3	530.285	8.65625	0.014682	0	0	0
apo	34	37	WVVQ	3	530.285	8.67826	0.001599	10	-0.022191	0.028674
apo	34	37	WVVQ	3	530.285	8.68931	0.009968	30	-0.026575	0.009875
apo	34	37	WVVQ	3	530.285	8.69369	0.001824	95	-0.018239	0.007403
apo	34	37	WVVQ	3	530.285	8.69858	0.001286	1000	-0.039979	0.008001
apo	34	37	WVVQ	3	530.285	8.68993	0.004096	10000	-0.011674	0.012624
cDG	34	37	WVVQ	3	530.285	8.64143	0.002721	0	0	0
cDG	34	37	WVVQ	3	530.285	8.67558	0.018249	10	-0.045705	0.013211
cDG	34	37	WVVQ	3	530.285	8.69594	0.007923	30	-0.056419	0.013159
cDG	34	37	WVVQ	3	530.285	8.68993	0.007912	95	-0.059577	0.011908
cDG	34	37	WVVQ	3	530.285	8.69261	0.005052	1000	-0.07073	0.013554
cDG	34	37	WVVQ	3	530.285	8.69459	0.005018	10000	-0.083397	0.013116
apo	34	39	WVVQQA	5	729.38	8.45783	0.011599	0	0	0
apo	34	39	WVVQQA	5	729.38	8.47258	0.001484	10	-0.04605	0.007959
apo	34	39	WVVQQA	5	729.38	8.48185	0.011136	30	-0.046307	0.020016
apo	34	39	WVVQQA	5	729.38	8.48013	0.002449	95	-0.082749	0.006687
apo	34	39	WVVQQA	5	729.38	8.48994	0.004	1000	-0.055935	0.01148
apo	34	39	WVVQQA	5	729.38	8.47934	0.003947	10000	-0.063307	0.021794
cDG	34	39	WVVQQA	5	729.38	8.44581	0.00427	0	0	0
cDG	34	39	WVVQQA	5	729.38	8.47852	0.013863	10	-0.0295	0.014867
cDG	34	39	WVVQQA	5	729.38	8.48565	0.010955	30	-0.030811	0.018708
cDG	34	39	WVVQQA	5	729.38	8.48084	0.008411	95	-0.043313	0.025495
cDG	34	39	WVVQQA	5	729.38	8.48125	0.004349	1000	-0.017713	0.016006
cDG	34	39	WVVQQA	5	729.38	8.48592	0.002713	10000	-0.056743	0.019274
apo	34	41	WVVQQAWK	7	1043.55	9.00945	0.011452	0	0	0
apo	34	41	WVVQQAWK	7	1043.55	9.03815	0.002463	10	-0.036539	0.015773
apo	34	41	WVVQQAWK	7	1043.55	9.06034	0.010725	30	-0.149216	0.025386
apo	34	41	WVVQQAWK	7	1043.55	9.06104	0.003145	95	-0.162044	0.021547
apo	34	41	WVVQQAWK	7	1043.55	9.07327	0.000834	1000	-0.151627	0.037947
apo	34	41	WVVQQAWK	7	1043.55	9.06368	0.004658	10000	-0.182067	0.024873
cDG	34	41	WVVQQAWK	7	1043.55	8.99761	0.003119	0	0	0
cDG	34	41	WVVQQAWK	7	1043.55	9.04201	0.018515	10	-0.068864	0.061093
cDG	34	41	WVVQQAWK	7	1043.55	9.06516	0.011069	30	-0.153984	0.029822
cDG	34	41	WVVQQAWK	7	1043.55	9.0595	0.006379	95	-0.155039	0.032256
cDG	34	41	WVVQQAWK	7	1043.55	9.066	0.007603	1000	-0.151113	0.030749
cDG	34	41	WVVQQAWK	7	1043.55	9.06481	0.00517	10000	-0.162339	0.036873
apo	34	45	WVVQQAWKIARE	11	1512.82	9.12689	0.00628	0	0	0
apo	34	45	WVVQQAWKIARE	11	1512.82	9.15395	0.001116	10	0.490901	0.018247
apo	34	45	WVVQQAWKIARE	11	1512.82	9.17187	0.010111	30	0.487852	0.014584
apo	34	45	WVVQQAWKIARE	11	1512.82	9.17208	0.002362	95	0.476167	0.013366
apo	34	45	WVVQQAWKIARE	11	1512.82	9.18767	0.003	1000	0.450215	0.013796
apo	34	45	WVVQQAWKIARE	11	1512.82	9.17919	0.003136	10000	0.486622	0.024615
cDG	34	45	WVVQQAWKIARE	11	1512.82	9.12047	0.003283	0	0	0
cDG	34	45	WVVQQAWKIARE	11	1512.82	9.15845	0.019089	10	0.523982	0.029093
cDG	34	45	WVVQQAWKIARE	11	1512.82	9.17764	0.009314	30	0.515178	0.016001
cDG	34	45	WVVQQAWKIARE	11	1512.82	9.17175	0.007655	95	0.511704	0.019502
cDG	34	45	WVVQQAWKIARE	11	1512.82	9.1783	0.009592	1000	0.507316	0.018997
cDG	34	45	WVVQQAWKIARE	11	1512.82	9.18394	0.004024	10000	0.522582	0.018235
apo	34	50	WVVQQAWKIARERIKSF	16	2144.2	9.75427	0.006831	0	0	0
apo	34	50	WVVQQAWKIARERIKSF	16	2144.2	9.79817	0.005085	10	2.10246	0.049887
apo	34	50	WVVQQAWKIARERIKSF	16	2144.2	9.81023	0.0123	30	2.81033	0.034548
apo	34	50	WVVQQAWKIARERIKSF	16	2144.2	9.81506	0.002118	95	3.44768	0.03412
apo	34	50	WVVQQAWKIARERIKSF	16	2144.2	9.8333	0.003982	1000	4.05044	0.053319
apo	34	50	WVVQQAWKIARERIKSF	16	2144.2	9.83871	0.004227	10000	4.08536	0.053805
cDG	34	50	WVVQQAWKIARERIKSF	16	2144.2	9.76457	0.006635	0	0	0
cDG	34	50	WVVQQAWKIARERIKSF	16	2144.2	9.79753	0.020332	10	1.94552	0.098665
cDG	34	50	WVVQQAWKIARERIKSF	16	2144.2	9.82163	0.010653	30	2.57324	0.048723
cDG	34	50	WVVQQAWKIARERIKSF	16	2144.2	9.81695	0.003156	95	3.23813	0.013762
cDG	34	50	WVVQQAWKIARERIKSF	16	2144.2	9.82608	0.008466	1000	3.95723	0.055448
cDG	34	50	WVVQQAWKIARERIKSF	16	2144.2	9.83874	0.005565	10000	4.15334	0.058139
apo	34	54	WVVQQAWKIARERIKSFPAVN	19	2525.4	9.61596	0.002024	0	0	0
apo	34	54	WVVQQAWKIARERIKSFPAVN	19	2525.4	9.64762	0.005107	10	3.95369	0.051835
apo	34	54	WVVQQAWKIARERIKSFPAVN	19	2525.4	9.65272	0.01045	30	4.70424	0.056178
apo	34	54	WVVQQAWKIARERIKSFPAVN	19	2525.4	9.65841	0.001919	95	5.29803	0.083633
apo	34	54	WVVQQAWKIARERIKSFPAVN	19	2525.4	9.68281	0.004212	1000	5.85862	0.066214
apo	34	54	WVVQQAWKIARERIKSFPAVN	19	2525.4	9.69076	0.000926	10000	5.8817	0.05009
cDG	34	54	WVVQQAWKIARERIKSFPAVN	19	2525.4	9.61567	0.007993	0	0	0
cDG	34	54	WVVQQAWKIARERIKSFPAVN	19	2525.4	9.65149	0.01706	10	3.65471	0.170822
cDG	34	54	WVVQQAWKIARERIKSFPAVN	19	2525.4	9.66999	0.004576	30	4.38597	0.02023
cDG	34	54	WVVQQAWKIARERIKSFPAVN	19	2525.4	9.6588	0.003192	95	5.07725	0.018723
cDG	34	54	WVVQQAWKIARERIKSFPAVN	19	2525.4	9.67789	0.008205	1000	5.72137	0.080216
cDG	34	54	WVVQQAWKIARERIKSFPAVN	19	2525.4	9.69165	0.006746	10000	5.99254	0.021327
apo	35	41	VVQQAWK	6	857.475	7.31959	0.017191	0	0	0
apo	35	41	VVQQAWK	6	857.475	7.3463	0.008734	10	-0.044955	0.034231
apo	35	41	VVQQAWK	6	857.475	7.37388	0.00951	30	-0.118457	0.019086
apo	35	41	VVQQAWK	6	857.475	7.38158	0.00565	95	-0.103718	0.018994
apo	35	41	VVQQAWK	6	857.475	7.37589	0.002292	1000	-0.105873	0.020719
apo	35	41	VVQQAWK	6	857.475	7.37294	0.004642	10000	-0.153381	0.092561
cDG	35	41	VVQQAWK	6	857.475	7.29978	0.006888	0	0	0
cDG	35	41	VVQQAWK	6	857.475	7.34798	0.022184	10	-0.036028	0.038235
cDG	35	41	VVQQAWK	6	857.475	7.38157	0.006815	30	-0.091281	0.023752
cDG	35	41	VVQQAWK	6	857.475	7.37266	0.015296	95	-0.093374	0.027391
cDG	35	41	VVQQAWK	6	857.475	7.37348	0.005711	1000	-0.057597	0.024615
cDG	35	41	VVQQAWK	6	857.475	7.37862	0.006875	10000	-0.093981	0.029133
apo	35	46	VVQQAWKIARER	11	1482.84	7.38871	0.011909	0	0	0
apo	35	46	VVQQAWKIARER	11	1482.84	7.40741	0.001674	10	0.8942	0.032381
apo	35	46	VVQQAWKIARER	11	1482.84	7.42923	0.009551	30	1.02006	0.024175
apo	35	46	VVQQAWKIARER	11	1482.84	7.43198	0.002714	95	1.09519	0.03024
apo	35	46	VVQQAWKIARER	11	1482.84	7.43112	0.000232	1000	1.14542	0.026906
apo	35	46	VVQQAWKIARER	11	1482.84	7.42983	0.003712	10000	1.15919	0.023465
cDG	35	46	VVQQAWKIARER	11	1482.84	7.37059	0.005126	0	0	0
cDG	35	46	VVQQAWKIARER	11	1482.84	7.41772	0.017607	10	0.911138	0.031727
cDG	35	46	VVQQAWKIARER	11	1482.84	7.43579	0.010124	30	1.03619	0.014763
cDG	35	46	VVQQAWKIARER	11	1482.84	7.43081	0.010314	95	1.15825	0.017065
cDG	35	46	VVQQAWKIARER	11	1482.84	7.42974	0.004069	1000	1.15283	0.032427
cDG	35	46	VVQQAWKIARER	11	1482.84	7.43499	0.006149	10000	1.21263	0.023659
apo	35	48	VVQQAWKIARERIK	13	1724.02	7.63031	0.011742	0	0	0
apo	35	48	VVQQAWKIARERIK	13	1724.02	7.64335	0.00319	10	1.20453	0.032043
apo	35	48	VVQQAWKIARERIK	13	1724.02	7.66624	0.00954	30	1.57145	0.042296
apo	35	48	VVQQAWKIARERIK	13	1724.02	7.6713	0.003695	95	1.96154	0.047049
apo	35	48	VVQQAWKIARERIK	13	1724.02	7.67168	0.001983	1000	2.53606	0.03328
apo	35	48	VVQQAWKIARERIK	13	1724.02	7.67238	0.004793	10000	2.51537	0.044959
cDG	35	48	VVQQAWKIARERIK	13	1724.02	7.61266	0.006742	0	0	0
cDG	35	48	VVQQAWKIARERIK	13	1724.02	7.65191	0.017041	10	1.1267	0.054098
cDG	35	48	VVQQAWKIARERIK	13	1724.02	7.67271	0.009973	30	1.44844	0.020525
cDG	35	48	VVQQAWKIARERIK	13	1724.02	7.66952	0.011058	95	1.88106	0.012189
cDG	35	48	VVQQAWKIARERIK	13	1724.02	7.66926	0.006872	1000	2.38453	0.039464
cDG	35	48	VVQQAWKIARERIK	13	1724.02	7.67576	0.004518	10000	2.58213	0.039473
apo	35	50	VVQQAWKIARERIKSF	15	1958.12	8.58338	0.01115	0	0	0
apo	35	50	VVQQAWKIARERIKSF	15	1958.12	8.58639	0.00093	10	2.04229	0.026008
apo	35	50	VVQQAWKIARERIKSF	15	1958.12	8.60584	0.013371	30	2.71442	0.029839
apo	35	50	VVQQAWKIARERIKSF	15	1958.12	8.60489	0.003254	95	3.27757	0.032659
apo	35	50	VVQQAWKIARERIKSF	15	1958.12	8.61099	0.002207	1000	3.92049	0.053861
apo	35	50	VVQQAWKIARERIKSF	15	1958.12	8.60676	0.005518	10000	3.87264	0.023119
cDG	35	50	VVQQAWKIARERIKSF	15	1958.12	8.56297	0.006313	0	0	0
cDG	35	50	VVQQAWKIARERIKSF	15	1958.12	8.59129	0.017754	10	1.9792	0.080145
cDG	35	50	VVQQAWKIARERIKSF	15	1958.12	8.61381	0.010159	30	2.51591	0.041606
cDG	35	50	VVQQAWKIARERIKSF	15	1958.12	8.60789	0.007645	95	3.08072	0.025286
cDG	35	50	VVQQAWKIARERIKSF	15	1958.12	8.60363	0.008052	1000	3.79443	0.095317
cDG	35	50	VVQQAWKIARERIKSF	15	1958.12	8.60557	0.005399	10000	4.04838	0.03454
apo	35	54	VVQQAWKIARERIKSFPAVN	18	2339.32	8.51607	0.014506	0	0	0
apo	35	54	VVQQAWKIARERIKSFPAVN	18	2339.32	8.53715	0.005179	10	4.12408	0.07322
apo	35	54	VVQQAWKIARERIKSFPAVN	18	2339.32	8.55879	0.011189	30	4.84161	0.021359
apo	35	54	VVQQAWKIARERIKSFPAVN	18	2339.32	8.55567	0.002988	95	5.50403	0.062138
apo	35	54	VVQQAWKIARERIKSFPAVN	18	2339.32	8.55623	0.002524	1000	6.08969	0.049071
apo	35	54	VVQQAWKIARERIKSFPAVN	18	2339.32	8.55345	0.00285	10000	6.0971	0.080954
cDG	35	54	VVQQAWKIARERIKSFPAVN	18	2339.32	8.50611	0.004464	0	0	0
cDG	35	54	VVQQAWKIARERIKSFPAVN	18	2339.32	8.5489	0.017568	10	3.85397	0.188762
cDG	35	54	VVQQAWKIARERIKSFPAVN	18	2339.32	8.55791	0.011364	30	4.62412	0.020057
cDG	35	54	VVQQAWKIARERIKSFPAVN	18	2339.32	8.55429	0.010805	95	5.32352	0.072281
cDG	35	54	VVQQAWKIARERIKSFPAVN	18	2339.32	8.55416	0.00811	1000	5.96463	0.101674
cDG	35	54	VVQQAWKIARERIKSFPAVN	18	2339.32	8.55478	0.003296	10000	6.22365	0.025126
apo	36	45	VQQAWKIARE	9	1227.67	7.83897	0.013379	0	0	0
apo	36	45	VQQAWKIARE	9	1227.67	7.86001	0.00384	10	0.60405	0.032056
apo	36	45	VQQAWKIARE	9	1227.67	7.88647	0.008945	30	0.63932	0.036584
apo	36	45	VQQAWKIARE	9	1227.67	7.88363	0.003638	95	0.578972	0.021669
apo	36	45	VQQAWKIARE	9	1227.67	7.88743	0.00192	1000	0.591069	0.023173
apo	36	45	VQQAWKIARE	9	1227.67	7.88715	0.001114	10000	0.639983	0.032867
cDG	36	45	VQQAWKIARE	9	1227.67	7.81872	0.005865	0	0	0
cDG	36	45	VQQAWKIARE	9	1227.67	7.87083	0.019218	10	0.634597	0.03121
cDG	36	45	VQQAWKIARE	9	1227.67	7.89272	0.012389	30	0.653633	0.031298
cDG	36	45	VQQAWKIARE	9	1227.67	7.88519	0.009643	95	0.606462	0.031142
cDG	36	45	VQQAWKIARE	9	1227.67	7.88549	0.005204	1000	0.620037	0.039964
cDG	36	45	VQQAWKIARE	9	1227.67	7.88767	0.00435	10000	0.679701	0.0298
apo	37	45	QQAWKIARE	8	1128.6	7.83828	0.013554	0	0	0
apo	37	45	QQAWKIARE	8	1128.6	7.85476	0.002128	10	0.567231	0.035
apo	37	45	QQAWKIARE	8	1128.6	7.88082	0.010343	30	0.617105	0.036098
apo	37	45	QQAWKIARE	8	1128.6	7.88103	0.003811	95	0.563298	0.042334
apo	37	45	QQAWKIARE	8	1128.6	7.88665	0.003519	1000	0.560829	0.047236
apo	37	45	QQAWKIARE	8	1128.6	7.88149	0.002409	10000	0.640881	0.039613
cDG	37	45	QQAWKIARE	8	1128.6	7.81756	0.006416	0	0	0
cDG	37	45	QQAWKIARE	8	1128.6	7.86409	0.020038	10	0.536804	0.072755
cDG	37	45	QQAWKIARE	8	1128.6	7.88859	0.012456	30	0.583561	0.037538
cDG	37	45	QQAWKIARE	8	1128.6	7.87936	0.01064	95	0.576383	0.041996
cDG	37	45	QQAWKIARE	8	1128.6	7.88167	0.005234	1000	0.58177	0.040332
cDG	37	45	QQAWKIARE	8	1128.6	7.88458	0.004478	10000	0.627737	0.040052
apo	37	46	QQAWKIARER	9	1284.7	7.38468	0.013452	0	0	0
apo	37	46	QQAWKIARER	9	1284.7	7.4014	0.002513	10	0.907767	0.010796
apo	37	46	QQAWKIARER	9	1284.7	7.42564	0.009539	30	1.06807	0.028013
apo	37	46	QQAWKIARER	9	1284.7	7.43006	0.004556	95	1.12521	0.022217
apo	37	46	QQAWKIARER	9	1284.7	7.4284	0.001895	1000	1.16835	0.016772
apo	37	46	QQAWKIARER	9	1284.7	7.42736	0.003369	10000	1.19487	0.004953
cDG	37	46	QQAWKIARER	9	1284.7	7.36881	0.004789	0	0	0
cDG	37	46	QQAWKIARER	9	1284.7	7.41003	0.01608	10	0.883712	0.025714
cDG	37	46	QQAWKIARER	9	1284.7	7.43266	0.009378	30	1.01453	0.019357
cDG	37	46	QQAWKIARER	9	1284.7	7.42795	0.010966	95	1.1359	0.027405
cDG	37	46	QQAWKIARER	9	1284.7	7.42723	0.003936	1000	1.16279	0.03177
cDG	37	46	QQAWKIARER	9	1284.7	7.43335	0.005577	10000	1.20569	0.03326
apo	40	45	WKIARE	5	801.449	7.34081	0.013672	0	0	0
apo	40	45	WKIARE	5	801.449	7.36608	0.001303	10	0.56465	0.017385
apo	40	45	WKIARE	5	801.449	7.39618	0.009333	30	0.630771	0.015925
apo	40	45	WKIARE	5	801.449	7.39948	0.001933	95	0.601274	0.015773
apo	40	45	WKIARE	5	801.449	7.40117	0.00151	1000	0.592553	0.019428
apo	40	45	WKIARE	5	801.449	7.39757	0.001322	10000	0.653951	0.021512
cDG	40	45	WKIARE	5	801.449	7.32326	0.008989	0	0	0
cDG	40	45	WKIARE	5	801.449	7.38315	0.018853	10	0.582286	0.034579
cDG	40	45	WKIARE	5	801.449	7.40004	0.008068	30	0.591888	0.022908
cDG	40	45	WKIARE	5	801.449	7.39553	0.012234	95	0.556541	0.023938
cDG	40	45	WKIARE	5	801.449	7.39616	0.004896	1000	0.587752	0.02607
cDG	40	45	WKIARE	5	801.449	7.39931	0.005331	10000	0.601775	0.027966
apo	40	54	WKIARERIKSFPAVN	13	1814.03	7.89528	0.015944	0	0	0
apo	40	54	WKIARERIKSFPAVN	13	1814.03	7.90561	0.001181	10	3.67148	0.056095
apo	40	54	WKIARERIKSFPAVN	13	1814.03	7.9261	0.010771	30	4.32051	0.042849
apo	40	54	WKIARERIKSFPAVN	13	1814.03	7.92709	0.004047	95	4.77974	0.078739
apo	40	54	WKIARERIKSFPAVN	13	1814.03	7.93084	0.000476	1000	5.34168	0.09779
apo	40	54	WKIARERIKSFPAVN	13	1814.03	7.92936	0.003884	10000	5.36995	0.065009
cDG	40	54	WKIARERIKSFPAVN	13	1814.03	7.87347	0.007519	0	0	0
cDG	40	54	WKIARERIKSFPAVN	13	1814.03	7.91491	0.019501	10	3.447	0.172371
cDG	40	54	WKIARERIKSFPAVN	13	1814.03	7.93407	0.009489	30	4.03517	0.027451
cDG	40	54	WKIARERIKSFPAVN	13	1814.03	7.92671	0.009443	95	4.58737	0.045917
cDG	40	54	WKIARERIKSFPAVN	13	1814.03	7.92938	0.004574	1000	5.19187	0.077247
cDG	40	54	WKIARERIKSFPAVN	13	1814.03	7.9333	0.005604	10000	5.45696	0.047686
apo	46	54	RIKSFPAVN	7	1030.59	7.37722	0.00797	0	0	0
apo	46	54	RIKSFPAVN	7	1030.59	7.39595	0.00286	10	2.19061	0.08791
apo	46	54	RIKSFPAVN	7	1030.59	7.42046	0.008477	30	2.63439	0.062491
apo	46	54	RIKSFPAVN	7	1030.59	7.42412	0.001697	95	2.6829	0.076575
apo	46	54	RIKSFPAVN	7	1030.59	7.4242	0.00031	1000	2.77324	0.092253
apo	46	54	RIKSFPAVN	7	1030.59	7.42106	0.002328	10000	2.74126	0.060978
cDG	46	54	RIKSFPAVN	7	1030.59	7.36334	0.003894	0	0	0
cDG	46	54	RIKSFPAVN	7	1030.59	7.40748	0.018419	10	2.10104	0.11084
cDG	46	54	RIKSFPAVN	7	1030.59	7.42732	0.008587	30	2.41	0.032215
cDG	46	54	RIKSFPAVN	7	1030.59	7.42147	0.008944	95	2.6136	0.040701
cDG	46	54	RIKSFPAVN	7	1030.59	7.41901	0.004075	1000	2.7937	0.072445
cDG	46	54	RIKSFPAVN	7	1030.59	7.42286	0.005824	10000	2.83571	0.064002
apo	46	55	RIKSFPAVND	8	1145.62	7.47056	0.017927	0	0	0
apo	46	55	RIKSFPAVND	8	1145.62	7.47702	0.001325	10	3.04515	0.088092
apo	46	55	RIKSFPAVND	8	1145.62	7.50646	0.009134	30	3.6414	0.155943
apo	46	55	RIKSFPAVND	8	1145.62	7.51039	0.004564	95	3.67558	0.206033
apo	46	55	RIKSFPAVND	8	1145.62	7.50737	0.000818	1000	3.80996	0.086362
apo	46	55	RIKSFPAVND	8	1145.62	7.50944	0.004263	10000	3.72569	0.132107
cDG	46	55	RIKSFPAVND	8	1145.62	7.4527	0.009436	0	0	0
cDG	46	55	RIKSFPAVND	8	1145.62	7.48992	0.02049	10	2.98948	0.20343
cDG	46	55	RIKSFPAVND	8	1145.62	7.51424	0.011961	30	3.48377	0.016945
cDG	46	55	RIKSFPAVND	8	1145.62	7.50746	0.011706	95	3.65153	0.048278
cDG	46	55	RIKSFPAVND	8	1145.62	7.50701	0.004549	1000	3.80385	0.065041
cDG	46	55	RIKSFPAVND	8	1145.62	7.5107	0.005475	10000	3.86519	0.053218
apo	46	60	RIKSFPAVNDVTGDE	13	1646.83	8.14315	0.014802	0	0	0
apo	46	60	RIKSFPAVNDVTGDE	13	1646.83	8.14307	0.002262	10	5.61962	0.061622
apo	46	60	RIKSFPAVNDVTGDE	13	1646.83	8.16215	0.0116	30	6.10131	0.047275
apo	46	60	RIKSFPAVNDVTGDE	13	1646.83	8.16779	0.002901	95	6.13443	0.073266
apo	46	60	RIKSFPAVNDVTGDE	13	1646.83	8.17186	0.001271	1000	6.19789	0.047273
apo	46	60	RIKSFPAVNDVTGDE	13	1646.83	8.16788	0.002919	10000	6.15677	0.092301
cDG	46	60	RIKSFPAVNDVTGDE	13	1646.83	8.1284	0.002367	0	0	0
cDG	46	60	RIKSFPAVNDVTGDE	13	1646.83	8.15056	0.015053	10	5.33388	0.231177
cDG	46	60	RIKSFPAVNDVTGDE	13	1646.83	8.16925	0.011576	30	5.79032	0.027337
cDG	46	60	RIKSFPAVNDVTGDE	13	1646.83	8.16095	0.007428	95	6.06776	0.086007
cDG	46	60	RIKSFPAVNDVTGDE	13	1646.83	8.16389	0.004216	1000	6.16747	0.102066
cDG	46	60	RIKSFPAVNDVTGDE	13	1646.83	8.17135	0.004559	10000	6.17401	0.115811
apo	46	66	RIKSFPAVNDVTGDERQDPRE	18	2428.21	7.55076	0.017425	0	0	0
apo	46	66	RIKSFPAVNDVTGDERQDPRE	18	2428.21	7.54586	0.001854	10	7.51159	0.245427
apo	46	66	RIKSFPAVNDVTGDERQDPRE	18	2428.21	7.57487	0.009317	30	8.20786	0.146558
apo	46	66	RIKSFPAVNDVTGDERQDPRE	18	2428.21	7.57652	0.003048	95	7.98826	0.197097
apo	46	66	RIKSFPAVNDVTGDERQDPRE	18	2428.21	7.57576	0.001038	1000	8.08754	0.164578
apo	46	66	RIKSFPAVNDVTGDERQDPRE	18	2428.21	7.57749	0.003872	10000	7.94901	0.104427
cDG	46	66	RIKSFPAVNDVTGDERQDPRE	18	2428.21	7.54259	0.007812	0	0	0
cDG	46	66	RIKSFPAVNDVTGDERQDPRE	18	2428.21	7.55584	0.017445	10	7.47803	0.213935
cDG	46	66	RIKSFPAVNDVTGDERQDPRE	18	2428.21	7.57587	0.009085	30	7.88303	0.043326
cDG	46	66	RIKSFPAVNDVTGDERQDPRE	18	2428.21	7.57239	0.012653	95	7.95683	0.06714
cDG	46	66	RIKSFPAVNDVTGDERQDPRE	18	2428.21	7.57328	0.006177	1000	7.99088	0.164968
cDG	46	66	RIKSFPAVNDVTGDERQDPRE	18	2428.21	7.57878	0.004049	10000	8.13765	0.132014
apo	46	69	RIKSFPAVNDVTGDERQDPREEKL	21	2798.43	7.75555	0.01307	0	0	0
apo	46	69	RIKSFPAVNDVTGDERQDPREEKL	21	2798.43	7.75865	0.000574	10	9.83994	0.071935
apo	46	69	RIKSFPAVNDVTGDERQDPREEKL	21	2798.43	7.77951	0.010071	30	10.3631	0.021677
apo	46	69	RIKSFPAVNDVTGDERQDPREEKL	21	2798.43	7.78459	0.00289	95	10.3729	0.118234
apo	46	69	RIKSFPAVNDVTGDERQDPREEKL	21	2798.43	7.78518	0.000761	1000	10.2111	0.21942
apo	46	69	RIKSFPAVNDVTGDERQDPREEKL	21	2798.43	7.78566	0.003138	10000	10.1621	0.21758
cDG	46	69	RIKSFPAVNDVTGDERQDPREEKL	21	2798.43	7.74254	0.007267	0	0	0
cDG	46	69	RIKSFPAVNDVTGDERQDPREEKL	21	2798.43	7.76535	0.017186	10	9.53993	0.254393
cDG	46	69	RIKSFPAVNDVTGDERQDPREEKL	21	2798.43	7.78738	0.008841	30	10.2003	0.033881
cDG	46	69	RIKSFPAVNDVTGDERQDPREEKL	21	2798.43	7.78365	0.011984	95	10.256	0.0594
cDG	46	69	RIKSFPAVNDVTGDERQDPREEKL	21	2798.43	7.78406	0.004832	1000	10.2589	0.138314
cDG	46	69	RIKSFPAVNDVTGDERQDPREEKL	21	2798.43	7.78875	0.003509	10000	10.258	0.24281
apo	46	70	RIKSFPAVNDVTGDERQDPREEKLA	22	2869.47	7.65045	0.012189	0	0	0
apo	46	70	RIKSFPAVNDVTGDERQDPREEKLA	22	2869.47	7.65504	0.001388	10	10.1965	0.05545
apo	46	70	RIKSFPAVNDVTGDERQDPREEKLA	22	2869.47	7.67732	0.011919	30	10.9049	0.046395
apo	46	70	RIKSFPAVNDVTGDERQDPREEKLA	22	2869.47	7.68131	0.002285	95	10.9424	0.058063
apo	46	70	RIKSFPAVNDVTGDERQDPREEKLA	22	2869.47	7.68394	0.001447	1000	10.9755	0.08612
apo	46	70	RIKSFPAVNDVTGDERQDPREEKLA	22	2869.47	7.6839	0.002915	10000	10.8113	0.072406
cDG	46	70	RIKSFPAVNDVTGDERQDPREEKLA	22	2869.47	7.63823	0.007713	0	0	0
cDG	46	70	RIKSFPAVNDVTGDERQDPREEKLA	22	2869.47	7.66159	0.016826	10	10.0717	0.310109
cDG	46	70	RIKSFPAVNDVTGDERQDPREEKLA	22	2869.47	7.68685	0.008037	30	10.7454	0.100368
cDG	46	70	RIKSFPAVNDVTGDERQDPREEKLA	22	2869.47	7.67977	0.012098	95	10.8094	0.125222
cDG	46	70	RIKSFPAVNDVTGDERQDPREEKLA	22	2869.47	7.68125	0.006428	1000	10.9103	0.148728
cDG	46	70	RIKSFPAVNDVTGDERQDPREEKLA	22	2869.47	7.68614	0.004211	10000	11.0611	0.122212
apo	46	71	RIKSFPAVNDVTGDERQDPREEKLAA	23	2940.5	7.66253	0.012287	0	0	0
apo	46	71	RIKSFPAVNDVTGDERQDPREEKLAA	23	2940.5	7.66237	0.001956	10	10.9452	0.051813
apo	46	71	RIKSFPAVNDVTGDERQDPREEKLAA	23	2940.5	7.68631	0.009103	30	11.4309	0.069636
apo	46	71	RIKSFPAVNDVTGDERQDPREEKLAA	23	2940.5	7.68833	0.002604	95	11.436	0.059758
apo	46	71	RIKSFPAVNDVTGDERQDPREEKLAA	23	2940.5	7.69254	0.001365	1000	11.4016	0.026679
apo	46	71	RIKSFPAVNDVTGDERQDPREEKLAA	23	2940.5	7.69083	0.003399	10000	11.3251	0.136519
cDG	46	71	RIKSFPAVNDVTGDERQDPREEKLAA	23	2940.5	7.64829	0.00473	0	0	0
cDG	46	71	RIKSFPAVNDVTGDERQDPREEKLAA	23	2940.5	7.67244	0.016412	10	10.6888	0.274988
cDG	46	71	RIKSFPAVNDVTGDERQDPREEKLAA	23	2940.5	7.69251	0.009814	30	11.2733	0.054566
cDG	46	71	RIKSFPAVNDVTGDERQDPREEKLAA	23	2940.5	7.68711	0.012654	95	11.2901	0.065834
cDG	46	71	RIKSFPAVNDVTGDERQDPREEKLAA	23	2940.5	7.68782	0.006743	1000	11.3458	0.096908
cDG	46	71	RIKSFPAVNDVTGDERQDPREEKLAA	23	2940.5	7.69503	0.004152	10000	11.4643	0.052396
apo	47	54	IKSFPAVN	6	874.491	7.75157	0.013669	0	0	0
apo	47	54	IKSFPAVN	6	874.491	7.75734	0.002864	10	2.40667	0.063217
apo	47	54	IKSFPAVN	6	874.491	7.7737	0.011084	30	2.74974	0.073009
apo	47	54	IKSFPAVN	6	874.491	7.77448	0.001642	95	2.78311	0.085872
apo	47	54	IKSFPAVN	6	874.491	7.7785	0.002921	1000	2.81316	0.037818
apo	47	54	IKSFPAVN	6	874.491	7.77458	0.002713	10000	2.72327	0.042107
cDG	47	54	IKSFPAVN	6	874.491	7.73526	0.008205	0	0	0
cDG	47	54	IKSFPAVN	6	874.491	7.76061	0.014028	10	2.16218	0.092015
cDG	47	54	IKSFPAVN	6	874.491	7.77886	0.010848	30	2.49557	0.041999
cDG	47	54	IKSFPAVN	6	874.491	7.77511	0.010565	95	2.68682	0.042153
cDG	47	54	IKSFPAVN	6	874.491	7.77339	0.005326	1000	2.78415	0.054687
cDG	47	54	IKSFPAVN	6	874.491	7.77691	0.00554	10000	2.79776	0.048212
apo	47	66	IKSFPAVNDVTGDERQDPRE	17	2272.11	7.79463	0.014171	0	0	0
apo	47	66	IKSFPAVNDVTGDERQDPRE	17	2272.11	7.79209	0.000931	10	7.75543	0.053941
apo	47	66	IKSFPAVNDVTGDERQDPRE	17	2272.11	7.81085	0.010847	30	8.03862	0.134163
apo	47	66	IKSFPAVNDVTGDERQDPRE	17	2272.11	7.81396	0.001544	95	8.02937	0.043738
apo	47	66	IKSFPAVNDVTGDERQDPRE	17	2272.11	7.81596	0.001732	1000	7.88511	0.062272
apo	47	66	IKSFPAVNDVTGDERQDPRE	17	2272.11	7.81668	0.001836	10000	7.8512	0.130112
cDG	47	66	IKSFPAVNDVTGDERQDPRE	17	2272.11	7.77936	0.005624	0	0	0
cDG	47	66	IKSFPAVNDVTGDERQDPRE	17	2272.11	7.7968	0.015171	10	7.4355	0.155988
cDG	47	66	IKSFPAVNDVTGDERQDPRE	17	2272.11	7.81601	0.008997	30	7.89277	0.071551
cDG	47	66	IKSFPAVNDVTGDERQDPRE	17	2272.11	7.81199	0.00926	95	7.94864	0.067128
cDG	47	66	IKSFPAVNDVTGDERQDPRE	17	2272.11	7.81199	0.005185	1000	7.94233	0.081841
cDG	47	66	IKSFPAVNDVTGDERQDPRE	17	2272.11	7.81702	0.004027	10000	8.02959	0.066445
apo	47	68	IKSFPAVNDVTGDERQDPREEK	19	2529.25	7.54824	0.018259	0	0	0
apo	47	68	IKSFPAVNDVTGDERQDPREEK	19	2529.25	7.54659	0.00192	10	7.92196	0.110563
apo	47	68	IKSFPAVNDVTGDERQDPREEK	19	2529.25	7.56981	0.011641	30	8.33742	0.025289
apo	47	68	IKSFPAVNDVTGDERQDPREEK	19	2529.25	7.57462	0.00169	95	8.01517	0.099207
apo	47	68	IKSFPAVNDVTGDERQDPREEK	19	2529.25	7.57787	0.003525	1000	7.99245	0.190848
apo	47	68	IKSFPAVNDVTGDERQDPREEK	19	2529.25	7.57635	0.003944	10000	7.85257	0.116412
cDG	47	68	IKSFPAVNDVTGDERQDPREEK	19	2529.25	7.5355	0.006288	0	0	0
cDG	47	68	IKSFPAVNDVTGDERQDPREEK	19	2529.25	7.54868	0.014273	10	7.69138	0.136115
cDG	47	68	IKSFPAVNDVTGDERQDPREEK	19	2529.25	7.57634	0.011916	30	8.18743	0.037982
cDG	47	68	IKSFPAVNDVTGDERQDPREEK	19	2529.25	7.57266	0.011174	95	8.13956	0.028868
cDG	47	68	IKSFPAVNDVTGDERQDPREEK	19	2529.25	7.57235	0.0043	1000	8.07727	0.194634
cDG	47	68	IKSFPAVNDVTGDERQDPREEK	19	2529.25	7.57769	0.004701	10000	8.11557	0.151028
apo	47	69	IKSFPAVNDVTGDERQDPREEKL	20	2642.33	7.96814	0.014357	0	0	0
apo	47	69	IKSFPAVNDVTGDERQDPREEKL	20	2642.33	7.97536	0.001667	10	8.74686	0.074809
apo	47	69	IKSFPAVNDVTGDERQDPREEKL	20	2642.33	7.99964	0.016632	30	8.95204	0.050483
apo	47	69	IKSFPAVNDVTGDERQDPREEKL	20	2642.33	7.99664	0.003402	95	8.90089	0.054269
apo	47	69	IKSFPAVNDVTGDERQDPREEKL	20	2642.33	8.00792	0.001777	1000	8.64669	0.297708
apo	47	69	IKSFPAVNDVTGDERQDPREEKL	20	2642.33	8.00302	0.006349	10000	8.62662	0.18672
cDG	47	69	IKSFPAVNDVTGDERQDPREEKL	20	2642.33	7.95763	0.005666	0	0	0
cDG	47	69	IKSFPAVNDVTGDERQDPREEKL	20	2642.33	7.97534	0.021726	10	8.52029	0.093263
cDG	47	69	IKSFPAVNDVTGDERQDPREEKL	20	2642.33	8.00735	0.014448	30	8.80252	0.060003
cDG	47	69	IKSFPAVNDVTGDERQDPREEKL	20	2642.33	8.00052	0.012049	95	8.75282	0.050825
cDG	47	69	IKSFPAVNDVTGDERQDPREEKL	20	2642.33	8.0027	0.004207	1000	8.59867	0.191436
cDG	47	69	IKSFPAVNDVTGDERQDPREEKL	20	2642.33	8.01022	0.007773	10000	8.81119	0.098353
apo	47	71	IKSFPAVNDVTGDERQDPREEKLAA	22	2784.4	7.8658	0.01472	0	0	0
apo	47	71	IKSFPAVNDVTGDERQDPREEKLAA	22	2784.4	7.86617	0.000644	10	10.2322	0.099852
apo	47	71	IKSFPAVNDVTGDERQDPREEKLAA	22	2784.4	7.88368	0.009259	30	10.4496	0.032104
apo	47	71	IKSFPAVNDVTGDERQDPREEKLAA	22	2784.4	7.88827	0.007478	95	10.415	0.100518
apo	47	71	IKSFPAVNDVTGDERQDPREEKLAA	22	2784.4	7.88804	0.002933	1000	10.2726	0.150502
apo	47	71	IKSFPAVNDVTGDERQDPREEKLAA	22	2784.4	7.88715	0.000281	10000	10.2059	0.127369
cDG	47	71	IKSFPAVNDVTGDERQDPREEKLAA	22	2784.4	7.84949	0.008403	0	0	0
cDG	47	71	IKSFPAVNDVTGDERQDPREEKLAA	22	2784.4	7.86991	0.013808	10	9.93335	0.168503
cDG	47	71	IKSFPAVNDVTGDERQDPREEKLAA	22	2784.4	7.89003	0.009268	30	10.3637	0.026227
cDG	47	71	IKSFPAVNDVTGDERQDPREEKLAA	22	2784.4	7.88454	0.006416	95	10.3774	0.087244
cDG	47	71	IKSFPAVNDVTGDERQDPREEKLAA	22	2784.4	7.88464	0.005609	1000	10.4632	0.076519
cDG	47	71	IKSFPAVNDVTGDERQDPREEKLAA	22	2784.4	7.89683	0.016346	10000	10.4151	0.060038
apo	51	66	PAVNDVTGDERQDPRE	13	1796.83	6.76322	0.016782	0	0	0
apo	51	66	PAVNDVTGDERQDPRE	13	1796.83	6.75535	0.00271	10	6.42455	0.072324
apo	51	66	PAVNDVTGDERQDPRE	13	1796.83	6.76399	0.009256	30	6.48023	0.161853
apo	51	66	PAVNDVTGDERQDPRE	13	1796.83	6.76961	0.001999	95	6.22426	0.106256
apo	51	66	PAVNDVTGDERQDPRE	13	1796.83	6.76793	0.000705	1000	6.2298	0.050783
apo	51	66	PAVNDVTGDERQDPRE	13	1796.83	6.76877	0.00334	10000	5.98197	0.107075
cDG	51	66	PAVNDVTGDERQDPRE	13	1796.83	6.75612	0.005146	0	0	0
cDG	51	66	PAVNDVTGDERQDPRE	13	1796.83	6.76075	0.010134	10	6.09243	0.141975
cDG	51	66	PAVNDVTGDERQDPRE	13	1796.83	6.76736	0.008428	30	6.37994	0.037952
cDG	51	66	PAVNDVTGDERQDPRE	13	1796.83	6.77007	0.011203	95	6.12281	0.167347
cDG	51	66	PAVNDVTGDERQDPRE	13	1796.83	6.76555	0.002413	1000	6.07404	0.067697
cDG	51	66	PAVNDVTGDERQDPRE	13	1796.83	6.76991	0.005397	10000	5.90643	0.079224
apo	51	71	PAVNDVTGDERQDPREEKLAA	18	2309.12	7.21048	0.011249	0	0	0
apo	51	71	PAVNDVTGDERQDPREEKLAA	18	2309.12	7.21032	0.001136	10	9.48605	0.104923
apo	51	71	PAVNDVTGDERQDPREEKLAA	18	2309.12	7.22757	0.009206	30	9.66441	0.039357
apo	51	71	PAVNDVTGDERQDPREEKLAA	18	2309.12	7.22986	0.001931	95	9.329	0.080581
apo	51	71	PAVNDVTGDERQDPREEKLAA	18	2309.12	7.22896	0.002194	1000	9.32352	0.051702
apo	51	71	PAVNDVTGDERQDPREEKLAA	18	2309.12	7.22794	0.001052	10000	9.15659	0.128282
cDG	51	71	PAVNDVTGDERQDPREEKLAA	18	2309.12	7.19778	0.005719	0	0	0
cDG	51	71	PAVNDVTGDERQDPREEKLAA	18	2309.12	7.21734	0.011757	10	9.393	0.222333
cDG	51	71	PAVNDVTGDERQDPREEKLAA	18	2309.12	7.23105	0.007916	30	9.61836	0.053632
cDG	51	71	PAVNDVTGDERQDPREEKLAA	18	2309.12	7.22978	0.009707	95	9.41671	0.032064
cDG	51	71	PAVNDVTGDERQDPREEKLAA	18	2309.12	7.22641	0.003466	1000	9.32445	0.07847
cDG	51	71	PAVNDVTGDERQDPREEKLAA	18	2309.12	7.2306	0.00494	10000	9.34672	0.024339
apo	55	60	DVTGDE	5	634.244	6.08847	0.010727	0	0	0
apo	55	60	DVTGDE	5	634.244	6.0996	0.018541	10	1.44085	0.030852
apo	55	60	DVTGDE	5	634.244	6.10284	0.008504	30	1.50715	0.024382
apo	55	60	DVTGDE	5	634.244	6.11102	0.017956	95	1.42817	0.02791
apo	55	60	DVTGDE	5	634.244	6.11556	0.010221	1000	1.41431	0.028835
apo	55	60	DVTGDE	5	634.244	6.10493	0.01242	10000	1.37065	0.016514
cDG	55	60	DVTGDE	5	634.244	6.06165	0.032724	0	0	0
cDG	55	60	DVTGDE	5	634.244	6.1008	0.00789	10	1.48287	0.058505
cDG	55	60	DVTGDE	5	634.244	6.1078	0.016828	30	1.51781	0.02895
cDG	55	60	DVTGDE	5	634.244	6.11251	0.04962	95	1.44693	0.03682
cDG	55	60	DVTGDE	5	634.244	6.09644	0.007695	1000	1.38436	0.026019
cDG	55	60	DVTGDE	5	634.244	6.10768	0.011903	10000	1.42358	0.009615
apo	55	66	DVTGDERQDPRE	10	1415.63	6.15412	0.010471	0	0	0
apo	55	66	DVTGDERQDPRE	10	1415.63	6.14985	0.004362	10	3.87328	0.142059
apo	55	66	DVTGDERQDPRE	10	1415.63	6.15846	0.009368	30	4.02172	0.061703
apo	55	66	DVTGDERQDPRE	10	1415.63	6.17136	0.002968	95	3.78046	0.096114
apo	55	66	DVTGDERQDPRE	10	1415.63	6.16845	0.003144	1000	3.69907	0.060959
apo	55	66	DVTGDERQDPRE	10	1415.63	6.16547	0.002978	10000	3.66256	0.080096
cDG	55	66	DVTGDERQDPRE	10	1415.63	6.13718	0.013878	0	0	0
cDG	55	66	DVTGDERQDPRE	10	1415.63	6.15312	0.006744	10	3.99237	0.122053
cDG	55	66	DVTGDERQDPRE	10	1415.63	6.16325	0.012203	30	4.02733	0.046215
cDG	55	66	DVTGDERQDPRE	10	1415.63	6.17281	0.019951	95	3.87433	0.047646
cDG	55	66	DVTGDERQDPRE	10	1415.63	6.16088	0.008041	1000	3.71302	0.100082
cDG	55	66	DVTGDERQDPRE	10	1415.63	6.165	0.005908	10000	3.817	0.037215
apo	55	69	DVTGDERQDPREEKL	13	1785.85	7.06844	0.015239	0	0	0
apo	55	69	DVTGDERQDPREEKL	13	1785.85	7.06964	0.001858	10	5.55862	0.166236
apo	55	69	DVTGDERQDPREEKL	13	1785.85	7.09305	0.012416	30	5.82413	0.086786
apo	55	69	DVTGDERQDPREEKL	13	1785.85	7.09781	0.002829	95	5.57072	0.076792
apo	55	69	DVTGDERQDPREEKL	13	1785.85	7.09481	0.002195	1000	5.57826	0.085986
apo	55	69	DVTGDERQDPREEKL	13	1785.85	7.09455	0.00218	10000	5.43171	0.102915
cDG	55	69	DVTGDERQDPREEKL	13	1785.85	7.05443	0.007239	0	0	0
cDG	55	69	DVTGDERQDPREEKL	13	1785.85	7.08077	0.016506	10	5.76892	0.154183
cDG	55	69	DVTGDERQDPREEKL	13	1785.85	7.09603	0.009946	30	5.85164	0.043434
cDG	55	69	DVTGDERQDPREEKL	13	1785.85	7.09346	0.011923	95	5.65823	0.062352
cDG	55	69	DVTGDERQDPREEKL	13	1785.85	7.09148	0.003267	1000	5.51513	0.084007
cDG	55	69	DVTGDERQDPREEKL	13	1785.85	7.097	0.004268	10000	5.6503	0.044181
apo	55	71	DVTGDERQDPREEKLAA	15	1927.92	6.93694	0.017646	0	0	0
apo	55	71	DVTGDERQDPREEKLAA	15	1927.92	6.93565	0.00256	10	6.96197	0.196387
apo	55	71	DVTGDERQDPREEKLAA	15	1927.92	6.95	0.009958	30	7.29907	0.061877
apo	55	71	DVTGDERQDPREEKLAA	15	1927.92	6.95362	0.002269	95	6.7986	0.176093
apo	55	71	DVTGDERQDPREEKLAA	15	1927.92	6.95238	0.00192	1000	6.823	0.125432
apo	55	71	DVTGDERQDPREEKLAA	15	1927.92	6.95257	0.00234	10000	6.74124	0.07212
cDG	55	71	DVTGDERQDPREEKLAA	15	1927.92	6.91944	0.007008	0	0	0
cDG	55	71	DVTGDERQDPREEKLAA	15	1927.92	6.9432	0.010974	10	7.11577	0.213027
cDG	55	71	DVTGDERQDPREEKLAA	15	1927.92	6.95392	0.009524	30	7.25758	0.032581
cDG	55	71	DVTGDERQDPREEKLAA	15	1927.92	6.95217	0.01121	95	6.96841	0.024136
cDG	55	71	DVTGDERQDPREEKLAA	15	1927.92	6.94969	0.003448	1000	6.83736	0.208681
cDG	55	71	DVTGDERQDPREEKLAA	15	1927.92	6.95469	0.005258	10000	6.84628	0.099449
apo	55	80	DVTGDERQDPREEKLAAALEHHHHHH	24	3063.44	6.92411	0.019672	0	0	0
apo	55	80	DVTGDERQDPREEKLAAALEHHHHHH	24	3063.44	6.91845	0.004554	10	7.89388	0.197896
apo	55	80	DVTGDERQDPREEKLAAALEHHHHHH	24	3063.44	6.93145	0.009465	30	8.09424	0.077332
apo	55	80	DVTGDERQDPREEKLAAALEHHHHHH	24	3063.44	6.94009	0.008255	95	7.99423	0.090792
apo	55	80	DVTGDERQDPREEKLAAALEHHHHHH	24	3063.44	6.94257	0.003873	1000	7.96996	0.022181
apo	55	80	DVTGDERQDPREEKLAAALEHHHHHH	24	3063.44	6.94843	0.003971	10000	7.90787	0.094165
cDG	55	80	DVTGDERQDPREEKLAAALEHHHHHH	24	3063.44	6.89779	0.01115	0	0	0
cDG	55	80	DVTGDERQDPREEKLAAALEHHHHHH	24	3063.44	6.92894	0.013194	10	7.72458	0.090992
cDG	55	80	DVTGDERQDPREEKLAAALEHHHHHH	24	3063.44	6.94165	0.010387	30	8.06312	0.035574
cDG	55	80	DVTGDERQDPREEKLAAALEHHHHHH	24	3063.44	6.94022	0.010977	95	7.93209	0.124327
cDG	55	80	DVTGDERQDPREEKLAAALEHHHHHH	24	3063.44	6.93778	0.006183	1000	7.8323	0.083779
cDG	55	80	DVTGDERQDPREEKLAAALEHHHHHH	24	3063.44	6.95143	0.007507	10000	8.08578	0.075972
apo	56	71	VTGDERQDPREEKLAA	14	1812.9	6.62725	0.017882	0	0	0
apo	56	71	VTGDERQDPREEKLAA	14	1812.9	6.61897	0.000592	10	6.64745	0.216191
apo	56	71	VTGDERQDPREEKLAA	14	1812.9	6.64217	0.016175	30	6.75996	0.11186
apo	56	71	VTGDERQDPREEKLAA	14	1812.9	6.65245	0.006971	95	6.4867	0.131562
apo	56	71	VTGDERQDPREEKLAA	14	1812.9	6.65135	0.004091	1000	6.47174	0.051548
apo	56	71	VTGDERQDPREEKLAA	14	1812.9	6.65656	0.003536	10000	6.30553	0.120888
cDG	56	71	VTGDERQDPREEKLAA	14	1812.9	6.61024	0.009881	0	0	0
cDG	56	71	VTGDERQDPREEKLAA	14	1812.9	6.63158	0.019459	10	6.72028	0.14348
cDG	56	71	VTGDERQDPREEKLAA	14	1812.9	6.64631	0.010517	30	6.79164	0.100805
cDG	56	71	VTGDERQDPREEKLAA	14	1812.9	6.64536	0.016581	95	6.66329	0.06621
cDG	56	71	VTGDERQDPREEKLAA	14	1812.9	6.64415	0.008558	1000	6.3174	0.208669
cDG	56	71	VTGDERQDPREEKLAA	14	1812.9	6.64941	0.009092	10000	6.49649	0.127467
apo	57	69	TGDERQDPREEKL	11	1571.75	7.07637	0.014874	0	0	0
apo	57	69	TGDERQDPREEKL	11	1571.75	7.06794	0.002787	10	5.4158	0.132165
apo	57	69	TGDERQDPREEKL	11	1571.75	7.0882	0.011257	30	5.67683	0.051535
apo	57	69	TGDERQDPREEKL	11	1571.75	7.09298	0.002828	95	5.40865	0.083478
apo	57	69	TGDERQDPREEKL	11	1571.75	7.09344	0.001615	1000	5.32929	0.096675
apo	57	69	TGDERQDPREEKL	11	1571.75	7.09131	0.002446	10000	5.23554	0.08059
cDG	57	69	TGDERQDPREEKL	11	1571.75	7.05594	0.008157	0	0	0
cDG	57	69	TGDERQDPREEKL	11	1571.75	7.08023	0.012583	10	5.51767	0.150619
cDG	57	69	TGDERQDPREEKL	11	1571.75	7.09494	0.011116	30	5.57274	0.036399
cDG	57	69	TGDERQDPREEKL	11	1571.75	7.09572	0.011939	95	5.43733	0.067825
cDG	57	69	TGDERQDPREEKL	11	1571.75	7.091	0.00289	1000	5.25555	0.111555
cDG	57	69	TGDERQDPREEKL	11	1571.75	7.09536	0.005662	10000	5.35071	0.014808
apo	57	71	TGDERQDPREEKLAA	13	1713.83	6.93625	0.016405	0	0	0
apo	57	71	TGDERQDPREEKLAA	13	1713.83	6.93247	0.001875	10	6.9227	0.138547
apo	57	71	TGDERQDPREEKLAA	13	1713.83	6.9471	0.010755	30	7.08868	0.02143
apo	57	71	TGDERQDPREEKLAA	13	1713.83	6.9504	0.0024	95	6.78603	0.138727
apo	57	71	TGDERQDPREEKLAA	13	1713.83	6.95073	0.001908	1000	6.76644	0.134776
apo	57	71	TGDERQDPREEKLAA	13	1713.83	6.95077	0.003059	10000	6.6118	0.123106
cDG	57	71	TGDERQDPREEKLAA	13	1713.83	6.91664	0.006109	0	0	0
cDG	57	71	TGDERQDPREEKLAA	13	1713.83	6.94117	0.011487	10	6.92911	0.197387
cDG	57	71	TGDERQDPREEKLAA	13	1713.83	6.95172	0.010596	30	7.08934	0.047687
cDG	57	71	TGDERQDPREEKLAA	13	1713.83	6.95125	0.01104	95	6.78157	0.104286
cDG	57	71	TGDERQDPREEKLAA	13	1713.83	6.94901	0.003287	1000	6.66801	0.151979
cDG	57	71	TGDERQDPREEKLAA	13	1713.83	6.95324	0.005624	10000	6.78141	0.056567
apo	59	71	DERQDPREEKLAA	11	1555.76	6.62346	0.016598	0	0	0
apo	59	71	DERQDPREEKLAA	11	1555.76	6.61554	0.001067	10	5.79105	0.112043
apo	59	71	DERQDPREEKLAA	11	1555.76	6.6357	0.016199	30	5.88137	0.079081
apo	59	71	DERQDPREEKLAA	11	1555.76	6.64003	0.006096	95	5.59484	0.096162
apo	59	71	DERQDPREEKLAA	11	1555.76	6.64118	0.002884	1000	5.56013	0.08628
apo	59	71	DERQDPREEKLAA	11	1555.76	6.64176	0.00602	10000	5.457	0.063937
cDG	59	71	DERQDPREEKLAA	11	1555.76	6.60654	0.008665	0	0	0
cDG	59	71	DERQDPREEKLAA	11	1555.76	6.62496	0.015115	10	5.81537	0.103106
cDG	59	71	DERQDPREEKLAA	11	1555.76	6.63888	0.010731	30	5.82948	0.0346
cDG	59	71	DERQDPREEKLAA	11	1555.76	6.6386	0.015698	95	5.61351	0.045566
cDG	59	71	DERQDPREEKLAA	11	1555.76	6.63532	0.004138	1000	5.49267	0.108416
cDG	59	71	DERQDPREEKLAA	11	1555.76	6.64027	0.010311	10000	5.56122	0.040213
apo	60	71	ERQDPREEKLAA	10	1440.73	6.40377	0.01594	0	0	0
apo	60	71	ERQDPREEKLAA	10	1440.73	6.40874	0.002893	10	5.15739	0.10956
apo	60	71	ERQDPREEKLAA	10	1440.73	6.42546	0.009072	30	5.29834	0.032367
apo	60	71	ERQDPREEKLAA	10	1440.73	6.4373	0.003892	95	5.02428	0.112163
apo	60	71	ERQDPREEKLAA	10	1440.73	6.43227	0.002143	1000	5.07175	0.041002
apo	60	71	ERQDPREEKLAA	10	1440.73	6.43176	0.002737	10000	4.8686	0.090173
cDG	60	71	ERQDPREEKLAA	10	1440.73	6.39109	0.010716	0	0	0
cDG	60	71	ERQDPREEKLAA	10	1440.73	6.41644	0.017268	10	5.17698	0.139095
cDG	60	71	ERQDPREEKLAA	10	1440.73	6.43171	0.013238	30	5.22387	0.083284
cDG	60	71	ERQDPREEKLAA	10	1440.73	6.43683	0.013997	95	5.06897	0.074218
cDG	60	71	ERQDPREEKLAA	10	1440.73	6.43001	0.003251	1000	4.88668	0.045663
cDG	60	71	ERQDPREEKLAA	10	1440.73	6.43445	0.005598	10000	4.99455	0.068849
apo	61	71	RQDPREEKLAA	9	1311.69	6.31571	0.013616	0	0	0
apo	61	71	RQDPREEKLAA	9	1311.69	6.3143	0.003647	10	4.39239	0.102795
apo	61	71	RQDPREEKLAA	9	1311.69	6.33549	0.01263	30	4.48075	0.060514
apo	61	71	RQDPREEKLAA	9	1311.69	6.34713	0.004001	95	4.2656	0.077776
apo	61	71	RQDPREEKLAA	9	1311.69	6.34167	0.002542	1000	4.21475	0.044522
apo	61	71	RQDPREEKLAA	9	1311.69	6.34089	0.002234	10000	4.14672	0.051508
cDG	61	71	RQDPREEKLAA	9	1311.69	6.30251	0.007398	0	0	0
cDG	61	71	RQDPREEKLAA	9	1311.69	6.32491	0.014583	10	4.41603	0.081523
cDG	61	71	RQDPREEKLAA	9	1311.69	6.34032	0.014227	30	4.43763	0.041241
cDG	61	71	RQDPREEKLAA	9	1311.69	6.34853	0.016055	95	4.32245	0.042801
cDG	61	71	RQDPREEKLAA	9	1311.69	6.33802	0.00341	1000	4.17479	0.078808
cDG	61	71	RQDPREEKLAA	9	1311.69	6.34075	0.005272	10000	4.25814	0.029041
apo	67	71	EKLAA	4	530.306	6.1409	0.008776	0	0	0
apo	67	71	EKLAA	4	530.306	6.14699	0.013879	10	1.59899	0.067707
apo	67	71	EKLAA	4	530.306	6.17273	0.010183	30	1.59071	0.056813
apo	67	71	EKLAA	4	530.306	6.18358	0.014677	95	1.50585	0.057905
apo	67	71	EKLAA	4	530.306	6.1854	0.007099	1000	1.52686	0.058089
apo	67	71	EKLAA	4	530.306	6.18163	0.009428	10000	1.49515	0.061876
cDG	67	71	EKLAA	4	530.306	6.11718	0.021983	0	0	0
cDG	67	71	EKLAA	4	530.306	6.16008	0.015854	10	1.5925	0.019679
cDG	67	71	EKLAA	4	530.306	6.17832	0.016787	30	1.5716	0.019098
cDG	67	71	EKLAA	4	530.306	6.18575	0.042567	95	1.5115	0.01383
cDG	67	71	EKLAA	4	530.306	6.17122	0.007679	1000	1.52766	0.041432
cDG	67	71	EKLAA	4	530.306	6.17949	0.010424	10000	1.52142	0.025701
