# Supplementary material for: CdbA is a DNA-binding protein and c-di-GMP receptor important for nucleoid organization and segregation in Myxococcus xanthus
Source: Nat Commun. 2020 Apr 14;11:1791. doi: 10.1038/s41467-020-15628-8 (PMC7156744; doi:10.1038/s41467-020-15628-8)
Supplement: Supplementary file 5 — Supplementary Data 2 [file 41467_2020_15628_MOESM5_ESM.xlsx]

## Sheet: Read me
	Supplementary Data 2. ChIP-seq peaks
	The list of ChIP-seq peaks from the CdbA_3xFLAG strain from one replicate showing peak rank, peak coordinates, coordinates of peak summit, peak length, peak shape score, p-value and enrichment over input for all the peaks with enrichment over input > 4-fold, sorted based on peak shape score. Absolute positions indicates if peak summit was found in the coding or intergenic region.
	Additionally, for each peak distance of peak summit to the closest ORF start codon and position of peak summit relatively to the closest ORF start codon has been calculated and the gene name with its predicted function in old and new annotation has been assigned.
	For each peak it was indicated by “YES” or “NO” if a putative CdbA binding motif could be found in a range of peak summit +/-50 bp using a Hidden Markov Model.
	p-value for peak shape score
	ChIP-Seq peak calling in CLC workbench is based on a shape learning algorithm. p-value for each genomic position is calculated as p-value=φ(-Peak shape score of the peak center), where φ is the standard normal cumulative distribution function.
	p-value for motif presence in the peak
	The probability matrix from the MEME-ChIP analysis using the top 100 peaks served as an input to create the Hidden Markov Model used for the genome wide search for putative CdbA binding sites with a given score. p-value of identified sequences was determined based on in silico simulation. In this simulation 1.000.000 of 18 bp random sequences with the same GC content as M. xanthus genome were scr…

## Sheet: ChIP-seq
peak rank	peak coordinates	peak summit	peak length	peak shape score	p-value for peak shape score	distance of peak summit to the closest ORF start codon	position of peak summit relatively to the closest ORF start codon	gene number (new annotation)	gene number (old annotation)	predicted protein function	gene start	gene end	motif present in the peak (p<0.00077)	motif present in the peak (p<0.00044)	motif present in the peak (p<0.000088)	absolute position	enrichment in log2 over input at the peak summit
1	4977602..4978005	4977836	404	35.7713	1.54254e-280	33	outside	MXAN_RS36870	MXAN_4058	ribbon-helix-helix domain-containing protein	4977803	4977639	YES	YES	YES	intergenic	6.69112
2	6943686..6944058	6943889	373	35.1483	6.16938e-271	62	outside	MXAN_RS27080	MXAN_5589	hypothetical protein	6943827	6943276	YES	YES	YES	intergenic	6.56478
3	652459..652840	652671	382	32.2047	7.59544e-228	291	outside	MXAN_RS02755	MXAN_0567	hypothetical protein	652380	652571	NO	NO	NO	intergenic	5.85083
4	2418670..2419041	2418872	372	31.567	5.24569e-219	17	outside	MXAN_RS10120	MXAN_2085	hypothetical protein	2418855	2418568	YES	YES	YES	intergenic	5.85487
5	8141348..8141721	8141552	374	31.5329	1.54061e-218	298	outside	MXAN_RS32010	MXAN_6613	sporulation delaying protein family toxin	8141850	8142485	YES	YES	YES	intergenic	5.80358
6	1700254..1700614	1700445	361	31.3093	1.74415e-215	131	outside	MXAN_RS06995	MXAN_1442	NAD(P)/FAD-dependent oxidoreductase	1700576	1701961	YES	YES	NO	intergenic	5.48497
7	35628..36011	35842	384	30.8351	4.43458e-209	129	outside	MXAN_RS00155	no in old annotation	YkgJ family cysteine cluster protein	35713	35219	YES	YES	YES	intergenic	6.00556
8	5327150..5327551	5327382	402	30.1138	1.59674e-199	71	outside	MXAN_RS21005	MXAN_4328	PilZ domain-containing protein	5327311	5326952	YES	YES	YES	intergenic	5.61017
9	6845033..6845393	6845225	361	29.8782	1.88669e-196	131	outside	MXAN_RS26660	MXAN_5498	hypothetical protein	6845356	6846342	YES	YES	YES	intergenic	5.65317
10	4629116..4629478	4629309	363	29.6907	5.06359e-194	7	outside	MXAN_RS18700	MXAN_3850	general stress protein	4629302	4628841	YES	YES	YES	intergenic	5.73622
11	1710053..1710407	1710238	355	29.3987	2.8511e-190	863	outside	MXAN_RS07040	MXAN_1451	hypothetical protein	1711101	1711811	NO	NO	NO	coding	5.63573
12	5094095..5094439	5094270	345	29.3175	3.10623e-189	330	outside	MXAN_RS20135	MXAN_4147	sigma-70 family RNA polymerase sigma factor	5094600	5095241	NO	NO	NO	coding	5.17705
13	1692154..1692522	1692353	369	29.1988	1.00368e-187	362	inside	MXAN_RS06960	MXAN_1435	hypothetical protein	1691991	1693619	YES	YES	YES	coding	5.33065
14	796804..797174	797005	371	29.0665	4.75985e-186	126	outside	MXAN_RS03375	no in old annotation	hypothetical protein	796879	796490	YES	YES	YES	intergenic	5.10404
15	3835869..3836225	3836056	357	29.0636	5.1868e-186	26	outside	MXAN_RS15915	MXAN_3284	alpha/beta hydrolase	3836082	3836714	YES	YES	YES	intergenic	5.50289
16	3070009..3070351	3070179	343	28.1357	1.79491e-174	162	inside	MXAN_RS12720	MXAN_2630	cysteine--tRNA ligase	3070017	3071531	NO	NO	NO	coding	5.04607
17	4984696..4985202	4985033	507	27.9301	5.74513e-172	253	inside	MXAN_RS19765	MXAN_4065	M67 family peptidase	4985286	4984873	NO	NO	NO	coding	5.0045
18	6944886..6945266	6945097	381	27.7757	4.26902e-170	347	inside	MXAN_RS27085	MXAN_5590	rhomboid family intramembrane serine protease	6945444	6943918	YES	YES	YES	coding	4.96119
19	6860851..6861192	6861021	342	27.6197	3.227e-168	163	outside	MXAN_RS26715	MXAN_5509	DUF2075 domain-containing protein	6860858	6857214	YES	YES	YES	intergenic	5.07732
20	3181267..3181613	3181444	347	27.5491	2.27114e-167	213	outside	MXAN_RS13225	MXAN_2730	NADH-quinone oxidoreductase subunit C	3181231	3180713	YES	YES	NO	intergenic	4.9343
21	2395275..2395632	2395466	358	27.2944	2.46877e-164	355	inside	MXAN_RS10020	MXAN_2064	carbon-nitrogen hydrolase family protein	2395821	2395018	YES	YES	YES	coding	5.09208
22	1056610..1056977	1056808	368	27.288	2.94031e-164	26	outside	MXAN_RS04455	MXAN_0927	cysteine dioxygenase	1056834	1057421	YES	YES	YES	coding	4.97642
23	6983579..6983957	6983788	379	27.1132	3.44133e-162	140	outside	MXAN_RS27235	MXAN_5620	serine/threonine protein kinase	6983928	6986264	YES	NO	NO	intergenic	4.79701
24	6251864..6252250	6252081	387	27.061	1.41682e-161	68	outside	MXAN_RS24285	MXAN_5001	IscS subfamily cysteine desulfurase	6252149	6253513	YES	YES	YES	intergenic	4.97368
25	7610787..7611133	7610964	347	27.0509	1.86418e-161	86	outside	MXAN_RS29820	MXAN_6151	hypothetical protein	7610878	7609964	YES	YES	YES	intergenic	4.81285
26	4938835..4939192	4939023	358	26.9061	9.30529e-160	270	inside	MXAN_RS19595	MXAN_4030	carboxypeptidase regulatory-like domain-containing protein	4939293	4936678	YES	YES	YES	coding	4.64127
27	6852829..6853182	6853013	354	26.7874	2.26571e-158	99	outside	MXAN_RS26700	MXAN_5506	RNA polymerase sigma factor	6853112	6853705	YES	YES	YES	intergenic	4.70005
28	7114913..7115272	7115103	360	26.7164	1.51768e-157	141	outside	MXAN_RS27845	MXAN_5745	alpha/beta fold hydrolase	7114962	7114102	YES	YES	YES	coding	4.64567
29	284503..284859	284673	357	26.588	4.67199e-156	175	inside	MXAN_RS01155	MXAN_0235	hypothetical protein	284848	284387	NO	NO	NO	coding	4.8047
30	7121740..7122097	7121928	358	26.4989	4.98552e-155	180	inside	MXAN_RS27885	MXAN_5753	flagellar motor protein MotA	7121748	7122458	YES	YES	YES	coding	4.60891
31	4391715..4392100	4391884	386	26.3617	1.8827e-153	128	outside	MXAN_RS17855	no in old annotation	hypothetical protein	4391756	4391547	YES	YES	YES	intergenic	4.79586
32	6960208..6960579	6960377	372	26.3517	2.45121e-153	224	inside	MXAN_RS27125	MXAN_5598	cell envelope biogenesis protein OmpA	6960601	6952502	NO	NO	NO	coding	4.36417
33	2427053..2427402	2427233	350	26.3228	5.26088e-153	139	outside	MXAN_RS10155	MXAN_2094	hypothetical protein	2427372	2427905	YES	NO	NO	intergenic	4.72215
34	8113536..8113891	8113722	356	26.0699	4.00318e-150	122	outside	MXAN_RS31905	no in old annotation	hypothetical protein	8113844	8114098	YES	YES	YES	intergenic	4.65959
35	3931693..3932046	3931877	354	26.0419	8.31395e-150	11	inside	MXAN_RS16375	MXAN_3382	cation transporter	3931866	3932873	YES	YES	YES	coding	4.36101
36	5698840..5699188	5699019	349	26.0371	9.41423e-150	108	outside	MXAN_RS22150	MXAN_4566	GNAT family N-acetyltransferase	5699127	5699624	NO	NO	NO	intergenic	4.80475
37	6218883..6219240	6219053	358	26.0322	1.06894e-149	16	outside	MXAN_RS24140	MXAN_4971	hypothetical protein	6219037	6217496	NO	NO	NO	intergenic	4.57323
38	5714204..5714615	5714446	412	26.0207	1.44424e-149	64	outside	MXAN_RS22210	MXAN_4577	TIGR02265 family protein	5714510	5715127	YES	YES	YES	intergenic	4.51711
39	726521..726869	726701	349	25.9756	4.67211e-149	11	outside	MXAN_RS03050	MXAN_0628	phospholipase	726712	727344	YES	YES	YES	intergenic	4.61701
40	6659379..6659719	6659551	341	25.9613	6.77693e-149	125	inside	MXAN_RS25955	MXAN_5348	M23 family metallopeptidase	6659676	6658759	YES	YES	NO	coding	4.81301
41	636322..636677	636492	356	25.7765	8.13583e-147	116	inside	MXAN_RS02680	MXAN_0552	PEGA domain-containing protein	636608	634938	YES	YES	NO	coding	4.68294
42	7914445..7914822	7914654	378	25.7028	5.43571e-146	306	inside	MXAN_RS31095	MXAN_6420	serine/threonine protein kinase	7914348	7916840	YES	YES	YES	coding	4.4517
43	743744..744084	743914	341	25.6127	5.50721e-145	66	outside	MXAN_RS03120	MXAN_0643	PAS domain S-box protein	743848	742253	NO	NO	NO	intergenic	4.28933
44	132738..133095	132926	358	25.5657	1.83709e-144	0	outside	MXAN_RS00570	MXAN_0114	lytic transglycosylase domain-containing protein	132926	134035	YES	YES	NO	intergenic	4.55883
45	1238083..1238441	1238272	359	25.5171	6.36296e-144	349	outside	MXAN_RS05100	no in old annotation	RNA polymerase factor sigma-54	1238621	1240138	YES	YES	YES	coding	4.38747
46	8267173..8267517	8267348	345	25.4568	2.96653e-143	58	outside	MXAN_RS32565	MXAN_6725	PDZ domain-containing protein	8267406	8270255	NO	NO	NO	intergenic	4.53009
47	3436092..3436442	3436274	351	25.4126	9.14463e-143	281	outside	MXAN_RS14180	MXAN_2925	vitamin B12-dependent ribonucleotide reductase	3435993	3433201	NO	NO	NO	intergenic	4.64663
48	2494329..2494677	2494508	349	25.3111	1.205e-141	353	outside	MXAN_RS10435	no in old annotation	hypothetical protein	2494155	2493874	YES	YES	YES	intergenic	4.27863
49	4919517..4919921	4919687	405	25.2905	2.03358e-141	229	outside	MXAN_RS19530	MXAN_4016	ATP-dependent 6-phosphofructokinase	4919916	4921013	YES	YES	NO	coding	4.40219
50	5891772..5892159	5891942	388	25.1883	2.6877e-140	273	outside	MXAN_RS22835	MXAN_4700	serine/threonine protein kinase	5891669	5888844	YES	YES	YES	intergenic	4.42398
51	6418861..6419240	6419071	380	25.0699	5.29092e-139	215	inside	MXAN_RS24965	MXAN_5137	M1 family peptidase	6418856	6420610	YES	YES	NO	coding	4.27736
52	4106475..4106975	4106806	501	25.0389	1.15279e-138	253	inside	MXAN_RS17085	no in old annotation	3-deoxy-7-phosphoheptulonate synthase	4107059	4106148	YES	YES	NO	coding	4.32467
53	4498942..4499370	4499202	429	25.025	1.634e-138	382	inside	MXAN_RS18330	MXAN_3778	TIGR02266 family protein	4498820	4501138	YES	YES	YES	coding	3.97303
54	8306673..8307014	8306845	342	24.7147	3.71246e-135	103	outside	MXAN_RS32715	MXAN_6756	hypothetical protein	8306948	8307841	NO	NO	NO	coding	4.2037
55	8116294..8116688	8116464	395	24.5885	8.38028e-134	100	outside	MXAN_RS31920	MXAN_6591	hypothetical protein	8116564	8117103	YES	NO	NO	intergenic	4.08107
56	7995207..7995561	7995395	355	24.5816	9.94786e-134	7	inside	MXAN_RS31405	MXAN_6483	MotA/TolQ/ExbB proton channel family protein	7995388	7996110	YES	YES	YES	coding	4.29345
57	1629880..1630222	1630050	343	24.4776	1.28052e-132	389	outside	MXAN_RS06730	no in old annotation	recombinase RecA	1630439	1631530	YES	YES	NO	coding	4.3997
58	6123656..6124000	6123832	345	24.2891	1.27871e-130	17	outside	MXAN_RS23745	MXAN_4891	NUDIX hydrolase	6123815	6123336	YES	YES	NO	intergenic	3.99328
59	8915247..8915754	8915585	508	24.2443	3.79688e-130	30	inside	MXAN_RS35320	MXAN_7299	fatty acid desaturase	8915555	8916607	YES	YES	NO	coding	4.4611
60	3492563..3492903	3492733	341	24.2218	6.55113e-130	251	inside	MXAN_RS14425	MXAN_2978	5-formyltetrahydrofolate cyclo-ligase	3492984	3492361	YES	YES	YES	coding	4.43312
61	8560318..8560720	8560551	403	24.1606	2.88857e-129	143	outside	MXAN_RS33870	MXAN_6998	XRE family transcriptional regulator	8560408	8559908	YES	YES	YES	intergenic	3.98738
62	2290967..2291349	2291180	383	24.1497	3.75809e-129	56	outside	MXAN_RS09470	MXAN_1952	DNA repair protein RadC	2291124	2290354	YES	YES	YES	intergenic	4.01622
63	8245367..8245707	8245538	341	24.0486	4.32164e-128	65	outside	MXAN_RS32460	MXAN_6704	GNAT family N-acetyltransferase	8245603	8246139	YES	YES	YES	intergenic	4.29921
64	6349219..6349556	6349389	338	24.0072	1.16922e-127	105	outside	MXAN_RS24655	MXAN_5075	ribose-phosphate pyrophosphokinase	6349494	6350444	NO	NO	NO	coding	3.97863
65	6103978..6104486	6104148	509	23.8626	3.74234e-126	309	outside	MXAN_RS23655	MXAN_4873	DNA replication protein	6104457	6105419	NO	NO	NO	coding	4.29884
66	9134843..9135201	9135032	359	23.8543	4.57311e-126	184	outside	MXAN_RS36250	MXAN_7512	50S ribosomal protein L34	9134848	9134696	YES	YES	YES	intergenic	4.0416
67	4121053..4121398	4121230	346	23.8463	5.53594e-126	20	outside	MXAN_RS17145	MXAN_3537	NADP-dependent isocitrate dehydrogenase	4121250	4122548	YES	YES	YES	intergenic	4.27254
68	7954074..7954431	7954263	358	23.8243	9.34595e-126	508	outside	MXAN_RS31245	MXAN_6451	hypothetical protein	7953755	7952994	YES	YES	YES	intergenic	4.10362
69	2394643..2395000	2394831	358	23.8181	1.08329e-125	114	inside	MXAN_RS10015	MXAN_2063	hypothetical protein	2394945	2394469	NO	NO	NO	coding	4.04531
70	7168302..7168643	7168472	342	23.772	3.25669e-125	312	outside	MXAN_RS28075	MXAN_5791	diguanylate cyclase	7168784	7169827	NO	NO	NO	coding	4.0564
71	7530959..7531320	7531129	362	23.7693	3.46617e-125	22	inside	MXAN_RS29520	MXAN_6085	SCO family protein	7531107	7531988	YES	YES	YES	coding	3.9959
72	533358..533716	533528	359	23.6037	1.76509e-123	59	inside	MXAN_RS02295	MXAN_0469	foldase	533587	532538	YES	YES	YES	coding	3.85064
73	6396856..6397259	6397090	404	23.5278	1.05997e-122	299	outside	MXAN_RS24885	MXAN_5121	hypothetical protein	6396791	6396498	YES	YES	YES	coding	3.90766
74	9016329..9016790	9016499	462	23.5173	1.35791e-122	80	outside	MXAN_RS35770	MXAN_7393	Fis family transcriptional regulator	9016419	9015832	YES	YES	YES	intergenic	4.12653
75	8532483..8532877	8532653	395	23.475	3.67485e-122	83	outside	MXAN_RS33750	MXAN_6972	metallophosphoesterase	8532736	8533638	YES	YES	YES	intergenic	3.89812
76	5134661..5135002	5134831	342	23.4475	7.01439e-122	112	inside	MXAN_RS20300	MXAN_4181	hypothetical protein	5134719	5138135	NO	NO	NO	coding	3.93437
77	7432564..7432921	7432752	358	23.4469	7.11604e-122	37	inside	MXAN_RS29135	no in old annotation	hypothetical protein	7432789	7432601	YES	YES	YES	coding	3.88362
78	6304753..6305124	6304955	372	23.3869	2.90549e-121	23	outside	MXAN_RS24495	MXAN_5042	cell envelope biogenesis protein OmpA	6304978	6306900	NO	NO	NO	intergenic	3.90777
79	3737114..3737501	3737284	388	23.3806	3.36496e-121	637	inside	MXAN_RS15455	MXAN_3191	hypothetical protein	3737921	3736830	YES	YES	YES	coding	3.99039
80	44669..45044	44839	376	23.2532	6.60195e-120	30	outside	MXAN_RS00200	MXAN_0037	ABC transporter ATP-binding protein	44809	43910	YES	YES	YES	intergenic	4.12372
81	5172314..5172721	5172484	408	23.1925	2.70701e-119	25	inside	MXAN_RS20455	no in old annotation	GTP cyclohydrolase II	5172459	5173133	YES	YES	YES	coding	4.15171
82	9019871..9020221	9020052	351	23.1247	1.30743e-118	30	outside	MXAN_RS35785	MXAN_7396	adenylate/guanylate cyclase domain-containing response regulator	9020022	9018562	YES	YES	YES	intergenic	4.02316
83	1184625..1184967	1184795	343	23.0931	2.71874e-118	104	outside	MXAN_RS04880	MXAN_1015	hypothetical protein	1184691	1184374	YES	YES	NO	coding	4.15036
84	5515088..5515593	5515424	506	23.0803	3.65392e-118	57	outside	MXAN_RS21635	MXAN_4454	cyclase	5515367	5514942	YES	YES	YES	coding	3.82782
85	8477716..8478069	8477900	354	22.9747	4.17184e-117	28	inside	MXAN_RS33535	MXAN_6926	response regulator	8477872	8478366	YES	YES	YES	coding	3.75452
86	2659164..2659505	2659339	342	22.9668	5.00899e-117	190	inside	MXAN_RS11055	MXAN_2288	glycosyl hydrolase	2659529	2657739	NO	NO	NO	coding	3.62025
87	8100963..8101306	8101137	344	22.9444	8.37343e-117	696	inside	MXAN_RS31855	MXAN_6575	iron ABC transporter permease	8101833	8100748	NO	NO	NO	coding	3.76632
88	4440954..4441293	4441124	340	22.8464	7.93588e-116	644	outside	MXAN_RS18075	MXAN_3726	peptidase S24	4441768	4442175	NO	NO	NO	coding	4.00765
89	5823069..5823448	5823239	380	22.8387	9.46148e-116	167	outside	MXAN_RS22525	MXAN_4640	response regulator	5823072	5820562	YES	YES	YES	intergenic	3.79197
90	6676792..6677167	6676998	376	22.8193	1.47369e-115	368	outside	MXAN_RS26020	MXAN_5362	YdcF family protein	6676630	6675854	NO	NO	NO	coding	3.78437
91	2416076..2416450	2416281	375	22.639	8.96195e-114	245	inside	MXAN_RS10105	MXAN_2082	RNA methyltransferase	2416036	2416767	NO	NO	NO	coding	3.81128
92	3404351..3404719	3404521	369	22.4949	2.33025e-112	23	inside	MXAN_RS14090	MXAN_2909	hypothetical protein	3404498	3404884	NO	NO	NO	coding	4.00621
93	4804441..4804834	4804611	394	22.4439	7.34099e-112	35	outside	MXAN_RS19170	no in old annotation	signal peptidase II	4804576	4804061	YES	YES	YES	coding	4.01455
94	2924582..2924923	2924752	342	22.3007	1.81979e-110	893	inside	MXAN_RS12140	no in old annotation	type II secretion system protein GspD	2925645	2923054	YES	YES	NO	coding	3.64708
95	3486124..3486585	3486294	462	22.2137	1.26483e-109	3299	inside	MXAN_RS14405	MXAN_2974	hypothetical protein	3482995	3489021	NO	NO	NO	coding	3.76125
96	7344772..7345116	7344942	345	22.2062	1.49712e-109	387	inside	MXAN_RS28715	no in old annotation	fructose-6-phosphate aldolase	7345329	7344658	YES	NO	NO	coding	3.97375
97	1776889..1777228	1777060	340	22.1021	1.50925e-108	29	outside	MXAN_RS07355	MXAN_1514	sigma-70 family RNA polymerase sigma factor	1777031	1776264	YES	YES	YES	coding	3.25935
98	3204750..3205093	3204924	344	22.0226	8.7461e-108	106	outside	MXAN_RS13335	MXAN_2752	AgmX/PglI C-terminal domain-containing protein	3205030	3206994	YES	YES	NO	intergenic	3.56958
99	4197742..4198084	4197915	343	22.006	1.26254e-107	196	inside	MXAN_RS17470	MXAN_3601	ATP-binding protein	4197719	4199251	NO	NO	NO	coding	3.82782
100	2127494..2127847	2127664	354	21.9375	5.69527e-107	225	outside	MXAN_RS08715	MXAN_1801	deaminase reductase	2127889	2128443	YES	YES	YES	intergenic	3.46265
101	4097461..4097826	4097631	366	21.8282	6.26941e-106	731	inside	MXAN_RS17045	MXAN_3518	long-chain fatty acid--CoA ligase	4096900	4098756	NO	NO	NO	coding	3.49762
102	6960843..6961193	6961024	351	21.8214	7.26391e-106	423	outside	MXAN_RS27125	MXAN_5598	cell envelope biogenesis protein OmpA	6960601	6952502	YES	NO	NO	coding	3.46302
103	3435499..3435839	3435670	341	21.7767	1.93087e-105	323	inside	MXAN_RS14180	MXAN_2925	vitamin B12-dependent ribonucleotide reductase	3435993	3433201	NO	NO	NO	coding	3.49629
104	1001206..1001689	1001376	484	21.7489	3.53423e-105	250	inside	MXAN_RS04235	no in old annotation	FHA domain-containing protein	1001626	1000928	NO	NO	NO	coding	3.5998
105	254111..254465	254296	355	21.6536	2.81125e-104	450	outside	MXAN_RS01030	no in old annotation	hypothetical protein	254746	255348	YES	YES	NO	intergenic	3.67568
106	6852033..6852373	6852203	341	21.5922	1.06363e-103	92	outside	MXAN_RS26695	MXAN_5505	response regulator	6852295	6852990	YES	YES	NO	intergenic	3.70992
107	3759481..3759820	3759651	340	21.5429	3.08882e-103	0	outside	MXAN_RS15540	MXAN_3209	hypothetical protein	3759651	3758734	NO	NO	NO	intergenic	3.81335
108	8620410..8620775	8620580	366	21.5109	6.15464e-103	218	inside	MXAN_RS34095	MXAN_7044	hypothetical protein	8620362	8621696	NO	NO	NO	coding	3.49014
109	2804201..2804658	2804371	458	21.43	3.51206e-102	30	outside	MXAN_RS11650	MXAN_2409	nuclear transport factor 2 family protein	2804401	2804763	YES	YES	YES	intergenic	3.90108
110	7044536..7044876	7044707	341	21.4245	3.94596e-102	238	outside	MXAN_RS27530	MXAN_5680	sigma-54-dependent Fis family transcriptional regulator	7044469	7042466	YES	YES	YES	coding	3.07943
111	5347152..5347527	5347322	376	21.4138	4.96609e-102	546	outside	MXAN_RS21080	no in old annotation	urocanate hydratase	5347868	5349523	NO	NO	NO	coding	3.5973
112	4453428..4453818	4453649	391	21.4126	5.09523e-102	105	inside	MXAN_RS18125	MXAN_3736	tetratricopeptide repeat protein	4453754	4453011	NO	NO	NO	coding	3.57501
113	342787..343136	342957	350	21.405	6.00665e-102	148	outside	MXAN_RS01415	MXAN_0289	thiol:disulfide interchange protein	343105	345429	YES	YES	NO	intergenic	3.37871
114	4445858..4446197	4446028	340	21.3866	8.91086e-102	247	outside	MXAN_RS18095	MXAN_3730	hypothetical protein	4446275	4447126	YES	YES	YES	coding	3.67305
115	8083886..8084227	8084056	342	21.3276	3.15013e-101	11	inside	MXAN_RS31785	MXAN_6561	serine/threonine protein kinase	8084067	8081212	YES	NO	NO	coding	3.42596
116	6651013..6651368	6651199	356	21.3107	4.52036e-101	14	outside	MXAN_RS25925	MXAN_5342	UMP kinase	6651185	6650433	NO	NO	NO	intergenic	3.34082
117	6494558..6494946	6494777	389	21.2712	1.05016e-100	24	outside	MXAN_RS25275	MXAN_5201	30S ribosomal protein S21	6494801	6494995	YES	YES	YES	intergenic	3.57459
118	8107065..8107436	8107267	372	21.2052	4.2726e-100	108	outside	MXAN_RS31875	MXAN_6580	FHA domain-containing protein	8107159	8106653	NO	NO	NO	intergenic	3.54696
119	7351044..7351395	7351226	352	21.1978	5.00564e-100	255	outside	MXAN_RS28745	MXAN_5928	4-hydroxy-tetrahydrodipicolinate synthase	7350971	7350084	NO	NO	NO	coding	3.09676
120	8604361..8604702	8604533	342	21.1551	1.2395e-99	38	outside	MXAN_RS34030	MXAN_7030	hypothetical protein	8604571	8604942	YES	YES	NO	intergenic	3.29634
121	3213194..3213581	3213364	388	21.0754	6.68516e-99	183	outside	MXAN_RS13370	MXAN_2759	MogA/MoaB family molybdenum cofactor biosynthesis protein	3213547	3214014	YES	YES	NO	intergenic	3.55756
122	1660981..1661351	1661151	371	21.0432	1.31877e-98	66	outside	MXAN_RS06850	MXAN_1413	hypothetical protein	1661085	1660456	NO	NO	NO	intergenic	3.89979
123	5935663..5936009	5935840	347	21.0246	1.95293e-98	109	outside	MXAN_RS23015	MXAN_4737	HDIG domain-containing protein	5935731	5933218	YES	YES	YES	intergenic	3.36139
124	3735834..3736202	3736004	369	20.9996	3.30711e-98	31	outside	MXAN_RS15450	MXAN_3190	methyltransferase domain-containing protein	3736035	3736805	NO	NO	NO	intergenic	3.75803
125	8308771..8309231	8308941	461	20.9397	1.16379e-97	13	inside	MXAN_RS32725	MXAN_6758	hypothetical protein	8308954	8308310	YES	NO	NO	coding	3.10063
126	2974630..2974972	2974803	343	20.936	1.25781e-97	127	outside	MXAN_RS12350	MXAN_2555	isoprenyl transferase	2974930	2975721	YES	YES	YES	intergenic	3.67004
127	3752914..3753268	3753084	355	20.8767	4.36e-97	471	inside	MXAN_RS15515	MXAN_3204	bifunctional (p)ppGpp synthetase/guanosine-3',5'-bis(diphosphate) 3'-pyrophosphohydrolase	3752613	3754832	NO	NO	NO	coding	3.412
128	6497160..6497516	6497347	357	20.8729	4.71865e-97	457	outside	MXAN_RS25290	MXAN_5204	RNA polymerase sigma factor RpoD	6497804	6499930	YES	NO	NO	coding	3.61804
129	6935190..6935601	6935360	412	20.8661	5.44198e-97	52	inside	MXAN_RS27045	MXAN_5581	hypothetical protein	6935412	6933337	NO	NO	NO	coding	3.29002
130	2564116..2564479	2564286	364	20.8152	1.57703e-96	219	inside	MXAN_RS10725	MXAN_2223	hypothetical protein	2564505	2562763	YES	NO	NO	coding	3.40975
131	3067010..3067360	3067179	351	20.8046	1.96414e-96	80	outside	MXAN_RS12705	MXAN_2627	CarD family transcriptional regulator	3067259	3067753	YES	YES	NO	intergenic	3.46604
132	3862936..3863304	3863135	369	20.7732	3.78293e-96	257	inside	MXAN_RS16075	MXAN_3316	30S ribosomal protein S5	3862878	3863399	YES	YES	NO	coding	3.48899
133	3523672..3524022	3523842	351	20.6687	3.31055e-95	179	inside	MXAN_RS14535	MXAN_3002	type I DNA topoisomerase	3523663	3527367	NO	NO	NO	coding	3.15608
134	1625374..1625735	1625567	362	20.6395	6.06508e-95	64	outside	MXAN_RS06705	no in old annotation	gamma-glutamyltransferase	1625503	1623695	YES	NO	NO	intergenic	3.21396
135	4147686..4148050	4147856	365	20.6301	7.36229e-95	110	outside	MXAN_RS17280	MXAN_3564	peptidase M36	4147966	4153308	YES	NO	NO	intergenic	3.36161
136	400582..400927	400758	346	20.6203	9.02872e-95	140	outside	MXAN_RS01675	MXAN_0342	hypothetical protein	400898	401953	YES	YES	NO	intergenic	3.31684
137	1248796..1249304	1248966	509	20.6184	9.38718e-95	97	inside	MXAN_RS05145	MXAN_1072	succinate dehydrogenase	1249063	1248383	NO	NO	NO	coding	3.73697
138	330782..331162	330993	381	20.6047	1.24525e-94	661	outside	MXAN_RS01355	MXAN_0276	energy transducer TonB	330332	329523	NO	NO	NO	coding	3.40824
139	8951088..8951445	8951278	358	20.536	5.12874e-94	551	outside	MXAN_RS35465	MXAN_7328	peptidase S8	8950727	8948922	YES	NO	NO	coding	3.1886
140	7918072..7918431	7918242	360	20.5033	1.00642e-93	82	outside	MXAN_RS31105	MXAN_6422	CHAP domain-containing protein	7918160	7917306	YES	YES	YES	coding	3.25593
141	398495..398946	398665	452	20.4561	2.64854e-93	31	outside	MXAN_RS01670	no in old annotation	potassium transporter Kup	398696	400657	NO	NO	NO	intergenic	3.30793
142	839877..840357	840188	481	20.4441	3.38784e-93	228	outside	MXAN_RS03550	MXAN_0735	cytochrome c	839960	838065	YES	YES	YES	coding	3.25732
143	3891700..3892051	3891870	352	20.4403	3.66102e-93	196	outside	MXAN_RS16220	MXAN_3347	HNH endonuclease	3892066	3892659	YES	YES	YES	coding	3.144
144	1629367..1629722	1629553	356	20.434	4.16977e-93	30	inside	MXAN_RS06725	MXAN_1387	hypothetical protein	1629523	1630326	YES	YES	YES	coding	3.31846
145	7468121..7468629	7468291	509	20.4284	4.67318e-93	1405	outside	MXAN_RS29285	MXAN_6036	2-oxoglutarate dehydrogenase complex dihydrolipoyllysine-residue succinyltransferase	7469696	7470892	NO	NO	NO	coding	3.38981
146	1664409..1664773	1664604	365	20.3933	9.59049e-93	184	inside	MXAN_RS06860	MXAN_1415	hypothetical protein	1664788	1663142	NO	NO	NO	coding	3.3341
147	2364180..2364535	2364367	356	20.3777	1.31802e-92	2	inside	MXAN_RS09860	MXAN_2033	DNA polymerase	2364365	2365051	NO	NO	NO	coding	3.4477
148	6681956..6682309	6682140	354	20.3214	4.16072e-92	299	inside	MXAN_RS26045	MXAN_5367	glycosyltransferase family 2 protein	6681841	6682632	YES	NO	NO	coding	3.25394
149	2340230..2340603	2340400	374	20.2849	8.74468e-92	119	outside	MXAN_RS09760	no in old annotation	trigger factor	2340519	2341796	YES	NO	NO	intergenic	3.1022
150	381967..382307	382139	341	20.2661	1.27995e-91	478	inside	MXAN_RS01590	MXAN_0324	DedA family protein	382617	382003	NO	NO	NO	coding	3.19438
151	825166..825556	825336	391	20.1858	6.53144e-91	457	outside	MXAN_RS03495	MXAN_0723	hypothetical protein	825793	826344	YES	YES	NO	coding	3.2361
152	8947633..8948024	8947855	392	20.164	1.01448e-90	49	inside	MXAN_RS35455	MXAN_7326	RNA polymerase sigma factor	8947806	8948420	YES	YES	NO	coding	3.2115
153	2195381..2195789	2195551	409	20.1621	1.05415e-90	896	outside	MXAN_RS09070	MXAN_1873	integrase	2194655	2195269	YES	YES	YES	intergenic	3.47727
154	3770482..3770924	3770652	443	20.1533	1.25994e-90	223	outside	MXAN_RS15590	MXAN_3219	3-deoxy-7-phosphoheptulonate synthase	3770875	3771993	NO	NO	NO	coding	3.50912
155	6172376..6172758	6172589	383	20.1441	1.51679e-90	256	inside	MXAN_RS23960	MXAN_4936	hypothetical protein	6172333	6173517	YES	YES	NO	coding	4.05729
156	8435180..8435533	8435364	354	20.0869	4.80603e-90	684	outside	MXAN_RS33345	no in old annotation	hypothetical protein	8434680	8435204	NO	NO	NO	coding	3.32646
157	479509..479855	479686	347	20.0696	6.80753e-90	90	outside	MXAN_RS02040	MXAN_0419	protein phosphatase	479776	480420	NO	NO	NO	coding	3.11631
158	9125987..9126332	9126157	346	20.0398	1.23952e-89	18	outside	MXAN_RS36190	no in old annotation	cysteine dioxygenase	9126139	9125546	NO	NO	NO	intergenic	3.10753
159	7397488..7397925	7397658	438	20.0156	2.01205e-89	245	outside	MXAN_RS28985	MXAN_5975	choice-of-anchor D domain-containing protein	7397903	7400899	YES	YES	YES	coding	3.38798
160	5917294..5917674	5917505	381	20.006	2.44325e-89	51	outside	MXAN_RS22940	MXAN_4722	OmpA family protein	5917454	5916294	YES	NO	NO	intergenic	3.26946
161	5367628..5367994	5367826	367	19.9794	4.16344e-89	15	outside	MXAN_RS21170	no in old annotation	TIGR04563 family protein	5367841	5368044	YES	YES	YES	intergenic	3.31199
162	32097..32443	32267	347	19.9622	5.86878e-89	876	inside	MXAN_RS00135	MXAN_0024	VacB/RNase II family 3'-5' exoribonuclease	31391	33286	YES	YES	YES	coding	3.14318
163	5925091..5925445	5925261	355	19.9405	9.06591e-89	647	outside	MXAN_RS22975	MXAN_4729	ABC transporter ATP-binding protein	5924614	5923940	NO	NO	NO	coding	3.20667
164	4075925..4076301	4076095	377	19.7729	2.54994e-87	324	outside	MXAN_RS16940	MXAN_3496	hypothetical protein	4075771	4075118	YES	NO	NO	intergenic	3.51498
165	8746635..8747143	8746805	509	19.7568	3.50851e-87	91	outside	MXAN_RS34685	MXAN_7163	metallophosphatase	8746896	8747561	YES	NO	NO	coding	3.26501
166	6080860..6081230	6081030	371	19.7451	4.41666e-87	152	outside	MXAN_RS23610	MXAN_4862	adventurous gliding motility protein GltJ	6080878	6078854	YES	YES	NO	coding	3.18107
167	462296..462706	462537	411	19.6541	2.66863e-86	201	inside	MXAN_RS01940	no in old annotation	YbhB/YbcL family Raf kinase inhibitor-like protein	462738	462220	YES	YES	YES	coding	3.11396
168	340853..341199	341030	347	19.5556	1.84809e-85	344	outside	MXAN_RS01405	MXAN_0286	4Fe-4S dicluster domain-containing protein	340686	338479	NO	NO	NO	intergenic	2.93819
169	21233..21636	21467	404	19.5531	1.93964e-85	199	outside	MXAN_RS00095	MXAN_0018	serine/threonine protein kinase	21268	19574	NO	NO	NO	intergenic	3.43463
170	7043765..7044145	7043976	381	19.5417	2.42725e-85	493	inside	MXAN_RS27530	MXAN_5680	sigma-54-dependent Fis family transcriptional regulator	7044469	7042466	NO	NO	NO	coding	3.26257
171	7654388..7654743	7654574	356	19.52	3.71524e-85	25	outside	MXAN_RS30010	MXAN_6189	hypothetical protein	7654549	7653515	YES	YES	NO	intergenic	3.09121
172	2271057..2271472	2271227	416	19.4829	7.66327e-85	293	outside	MXAN_RS09395	MXAN_1937	nucleoside deaminase	2270934	2270470	NO	NO	NO	intergenic	3.59483
173	7351983..7352317	7352153	335	19.4553	1.31292e-84	76	inside	MXAN_RS28750	no in old annotation	diaminopimelate decarboxylase	7352229	7350988	NO	NO	NO	coding	3.28161
174	1741151..1741505	1741336	355	19.4022	3.69713e-84	179	outside	MXAN_RS07180	MXAN_1479	ribonuclease J	1741157	1739517	YES	YES	NO	intergenic	3.06808
175	4939424..4939795	4939594	372	19.3849	5.17978e-84	121	inside	MXAN_RS19600	MXAN_4031	DUF721 domain-containing protein	4939473	4939778	YES	YES	NO	coding	2.92968
176	434421..434777	434608	357	19.3669	7.34334e-84	5	inside	MXAN_RS01805	MXAN_0367	hypothetical protein	434613	434260	YES	YES	YES	coding	2.86507
177	6421846..6422342	6422173	497	19.343	1.16842e-83	215	outside	MXAN_RS24975	MXAN_5139	50S ribosomal protein L31	6421958	6421737	NO	NO	NO	coding	3.15062
178	8707849..8708192	8708018	344	19.3218	1.76064e-83	460	inside	MXAN_RS34530	MXAN_7133	DUF4150 domain-containing protein	8707558	8708022	YES	NO	NO	coding	4.11603
179	3860565..3860939	3860735	375	19.3128	2.0969e-83	260	outside	MXAN_RS16055	MXAN_3312	type Z 30S ribosomal protein S14	3860995	3861180	NO	NO	NO	coding	3.02875
180	2352469..2352826	2352657	358	19.3113	2.15875e-83	12	outside	MXAN_RS09800	MXAN_2021	response regulator	2352669	2353130	NO	NO	NO	intergenic	2.97006
181	4658423..4658787	4658593	365	19.3009	2.63987e-83	199	outside	MXAN_RS18845	MXAN_3879	response regulator	4658792	4661380	YES	YES	YES	intergenic	3.10245
182	2403339..2403847	2403509	509	19.2867	3.47063e-83	462	inside	MXAN_RS10050	no in old annotation	tRNA pseudouridine(55) synthase TruB	2403047	2403916	NO	NO	NO	coding	3.02346
183	8564379..8564755	8564587	377	19.2707	4.73364e-83	1336	outside	MXAN_RS33885	MXAN_7001	response regulator	8563251	8563619	YES	NO	NO	coding	3.28657
184	4454353..4454861	4454523	509	19.2126	1.45231e-82	293	outside	MXAN_RS18140	MXAN_3739	RsmB/NOP family class I SAM-dependent RNA methyltransferase	4454816	4456102	NO	NO	NO	coding	3.18154
185	914928..915394	915098	467	19.2048	1.68764e-82	67	outside	MXAN_RS03870	MXAN_0804	TetR family transcriptional regulator	915165	917057	NO	NO	NO	intergenic	3.36769
186	1357609..1357974	1357779	366	19.1743	3.03513e-82	556	inside	MXAN_RS05605	MXAN_1163	serine/threonine protein kinase	1358335	1356497	NO	NO	NO	coding	2.8204
187	6547718..6548056	6547894	339	19.1546	4.42654e-82	109	outside	MXAN_RS25510	MXAN_5251	phospholipase	6548003	6548743	NO	NO	NO	coding	3.38417
188	3178289..3178631	3178457	343	19.137	6.20672e-82	884	outside	MXAN_RS13210	MXAN_2727	NADH-quinone oxidoreductase subunit H	3177573	3176125	YES	YES	NO	coding	2.99465
189	4874431..4874883	4874601	453	19.0946	1.3993e-81	131	inside	MXAN_RS19440	MXAN_3999	N-acetylmuramoyl-L-alanine amidase	4874470	4875351	YES	YES	YES	coding	3.26777
190	6277313..6277731	6277562	419	19.0612	2.65117e-81	237	inside	MXAN_RS24395	MXAN_5022	hypothetical protein	6277325	6277711	NO	NO	NO	coding	3.03562
191	4547710..4548216	4547879	507	19.0607	2.67669e-81	323	outside	MXAN_RS18345	MXAN_3781	DedA family protein	4547556	4546777	NO	NO	NO	intergenic	3.11171
192	7165196..7165573	7165405	378	19.045	3.61172e-81	302	outside	MXAN_RS28055	MXAN_5787	PilT/PilU family type 4a pilus ATPase	7165103	7163985	YES	YES	YES	coding	2.84283
193	7348472..7348818	7348649	347	18.8477	1.53539e-79	184	outside	MXAN_RS28730	no in old annotation	2-amino-4-hydroxy-6-hydroxymethyldihydropteridine diphosphokinase	7348465	7347941	YES	YES	NO	coding	2.7511
194	2341710..2342123	2341880	414	18.8128	2.96628e-79	62	inside	MXAN_RS09765	no in old annotation	ATP-dependent Clp endopeptidase proteolytic subunit ClpP	2341818	2342438	NO	NO	NO	coding	3.11286
195	2530854..2531195	2531024	342	18.7366	1.24406e-78	308	outside	MXAN_RS10570	MXAN_2188	glucose dehydrogenase	2530716	2529208	YES	YES	YES	coding	3.30378
196	5041344..5041689	5041521	346	18.7255	1.53471e-78	30	outside	MXAN_RS19915	MXAN_4096	S58 family peptidase	5041491	5040139	YES	NO	NO	intergenic	3.07409
197	5104945..5105349	5105115	405	18.6996	2.49398e-78	57	outside	MXAN_RS20175	MXAN_4155	hypothetical protein	5105058	5102635	YES	YES	YES	intergenic	3.31307
198	9032440..9032781	9032613	342	18.6636	4.89116e-78	190	outside	MXAN_RS35830	MXAN_7407	hypothetical protein	9032423	9031800	YES	YES	NO	intergenic	3.0644
199	6442329..6442683	6442499	355	18.5856	2.10209e-77	74	outside	MXAN_RS25050	MXAN_5156	pesticin	6442425	6441583	YES	YES	YES	intergenic	3.34303
200	970657..971018	970849	362	18.5273	6.22279e-77	11	outside	MXAN_RS04095	MXAN_0855	chemotaxis protein MotB	970860	971663	NO	NO	NO	intergenic	2.87904
201	5919819..5920161	5919993	343	18.5108	8.44925e-77	329	outside	MXAN_RS22955	no in old annotation	3-hydroxyacyl-ACP dehydratase FabZ	5919664	5919203	YES	YES	NO	coding	3.50301
202	5973679..5974020	5973849	342	18.5041	9.56093e-77	220	outside	MXAN_RS23195	MXAN_4773	50S ribosomal protein L32	5973629	5973817	YES	YES	NO	intergenic	3.20399
203	1739426..1739780	1739611	355	18.4932	1.17127e-76	116	outside	MXAN_RS07175	MXAN_1478	YajQ family cyclic di-GMP-binding protein	1739495	1738998	NO	NO	NO	coding	3.03001
204	5390968..5391325	5391156	358	18.4824	1.42996e-76	770	outside	MXAN_RS21295	MXAN_4387	hypothetical protein	5390386	5389907	NO	NO	NO	coding	3.58496
205	8762594..8762963	8762764	370	18.4728	1.71031e-76	252	inside	MXAN_RS34760	MXAN_7179	hypothetical protein	8763016	8762411	YES	YES	NO	coding	2.62287
206	2270196..2270541	2270372	346	18.4709	1.77095e-76	562	outside	MXAN_RS09395	MXAN_1937	nucleoside deaminase	2270934	2270470	NO	NO	NO	intergenic	2.79046
207	4726363..4726713	4726533	351	18.4669	1.90835e-76	108	outside	MXAN_RS19080	MXAN_3927	NUDIX domain-containing protein	4726425	4725907	YES	YES	YES	coding	3.5674
208	4561626..4561999	4561796	374	18.4532	2.45748e-76	205	outside	MXAN_RS18405	MXAN_3793	30S ribosomal protein S1	4561591	4559879	NO	NO	NO	intergenic	3.27136
209	4092147..4092499	4092317	353	18.389	8.05098e-76	155	inside	MXAN_RS17020	MXAN_3512	glutamine-hydrolyzing carbamoyl-phosphate synthase small subunit	4092162	4093286	YES	NO	NO	coding	2.96639
210	3353777..3354142	3353973	366	18.3674	1.19797e-75	16	outside	MXAN_RS13925	MXAN_2875	AI-2E family transporter	3353989	3355182	YES	YES	YES	intergenic	3.27895
211	2897367..2897874	2897705	508	18.3636	1.28384e-75	227	outside	MXAN_RS12020	MXAN_2485	DNA topoisomerase IV subunit A	2897478	2895037	YES	YES	YES	intergenic	2.95264
212	3102122..3102508	3102292	387	18.3529	1.56517e-75	1410	inside	MXAN_RS12865	MXAN_2659	hypothetical protein	3103702	3102167	NO	NO	NO	coding	2.66451
213	239667..240045	239836	379	18.2633	8.10933e-75	430	inside	MXAN_RS00970	MXAN_0196	GAF domain-containing protein	239406	241313	YES	YES	YES	coding	2.89665
214	8639956..8640306	8640137	351	18.2162	1.91977e-74	50	outside	MXAN_RS34200	MXAN_7065	hypothetical protein	8640187	8641401	NO	NO	NO	intergenic	2.75028
215	403291..403658	403489	368	18.2085	2.21098e-74	11	inside	MXAN_RS01690	MXAN_0345	N-acetylmuramoyl-L-alanine amidase	403478	405337	NO	NO	NO	coding	2.96562
216	9013189..9013533	9013364	345	18.1886	3.17438e-74	79	inside	MXAN_RS35750	MXAN_7388	SCO family protein	9013285	9014064	NO	NO	NO	coding	3.01249
217	1261980..1262486	1262150	507	18.1806	3.67355e-74	440	inside	MXAN_RS05190	MXAN_1081	NADH-quinone oxidoreductase subunit M	1262590	1260857	NO	NO	NO	coding	3.32331
218	6330379..6330886	6330717	508	18.1021	1.53416e-73	163	outside	MXAN_RS24565	MXAN_5057	ribonucleoside-diphosphate reductase subunit alpha	6330880	6333396	NO	NO	NO	intergenic	3.28619
219	1677784..1678122	1677954	339	18.0845	2.11176e-73	356	outside	MXAN_RS06915	MXAN_1426	hypothetical protein	1678310	1679065	NO	NO	NO	coding	2.66509
220	3409775..3410113	3409945	339	18.0629	3.12495e-73	114	outside	MXAN_RS14105	MXAN_2912	MerR family transcriptional regulator	3410059	3410583	YES	YES	YES	intergenic	3.33376
221	3849680..3850188	3849850	509	18.0249	6.20699e-73	27	outside	MXAN_RS15970	MXAN_3295	30S ribosomal protein S12	3849877	3850248	YES	YES	YES	intergenic	3.37404
222	4145652..4145994	4145822	343	17.9415	2.79474e-72	597	outside	MXAN_RS17275	MXAN_3563	aromatic alcohol reductase	4146419	4147363	NO	NO	NO	intergenic	3.0401
223	6267100..6267532	6267270	433	17.8952	6.43146e-72	899	inside	MXAN_RS24345	MXAN_5013	hypothetical protein	6268169	6266793	YES	YES	NO	coding	3.61411
224	1150660..1151027	1150858	368	17.8703	1.00464e-71	146	inside	MXAN_RS04780	MXAN_0994	TIGR02265 family protein	1150712	1151311	NO	NO	NO	coding	2.81218
225	3059404..3059748	3059580	345	17.8658	1.0884e-71	400	outside	MXAN_RS12670	MXAN_2620	hypothetical protein	3059980	3060414	NO	NO	NO	coding	2.80105
226	990877..991230	991061	354	17.8305	2.05037e-71	190	outside	MXAN_RS04185	MXAN_0873	adenylate/guanylate cyclase domain-containing protein	991251	991850	NO	NO	NO	intergenic	2.93411
227	2991818..2992171	2992003	354	17.819	2.51476e-71	192	outside	MXAN_RS12430	MXAN_2571	aminotransferase class I/II-fold pyridoxal phosphate-dependent enzyme	2992195	2993550	NO	NO	NO	intergenic	3.04317
228	3113607..3113990	3113777	384	17.7766	5.36768e-71	520	outside	MXAN_RS12905	MXAN_2667	pyruvate dehydrogenase complex E1 component subunit beta	3114297	3115283	NO	NO	NO	coding	3.07136
229	8962145..8962484	8962315	340	17.7698	6.05701e-71	1388	outside	MXAN_RS35520	MXAN_7340	hypothetical protein	8960927	8960403	NO	NO	NO	intergenic	2.74048
230	5893127..5893566	5893297	440	17.7475	9.00977e-71	300	outside	MXAN_RS36930	no in old annotation		5892997	5893110	YES	YES	YES	intergenic	3.12418
231	7895536..7895918	7895706	383	17.6464	5.42191e-70	182	inside	MXAN_RS31045	MXAN_6410	DUF1800 domain-containing protein	7895888	7894164	YES	YES	YES	coding	3.06447
232	3025690..3026046	3025860	357	17.6463	5.42858e-70	19	outside	MXAN_RS12565	MXAN_2599	hypothetical protein	3025841	3024189	YES	NO	NO	intergenic	2.92945
233	6212999..6213404	6213235	406	17.6293	7.33344e-70	5	outside	MXAN_RS24120	MXAN_4967	UDP-3-O-acyl-N-acetylglucosamine deacetylase	6213230	6212286	NO	NO	NO	intergenic	2.96991
234	110537..110911	110742	375	17.629	7.37566e-70	284	outside	MXAN_RS00480	MXAN_0095	PAS domain S-box protein	110458	108152	NO	NO	NO	coding	2.68961
235	3175439..3175888	3175609	450	17.6085	1.05956e-69	447	outside	MXAN_RS13200	MXAN_2724	(2Fe-2S) ferredoxin domain-containing protein	3175162	3174797	YES	YES	NO	coding	2.71597
236	7446542..7446897	7446712	356	17.5425	3.39118e-69	47	inside	MXAN_RS29185	MXAN_6016	oxidoreductase	7446759	7445722	NO	NO	NO	coding	2.86387
237	8747413..8747885	8747716	473	17.5329	4.01674e-69	820	outside	MXAN_RS34685	MXAN_7163	metallophosphatase	8746896	8747561	NO	NO	NO	coding	2.61713
238	5153060..5153409	5153240	350	17.4872	8.96586e-69	98	outside	MXAN_RS20375	MXAN_4197	two-component sensor histidine kinase	5153142	5151901	YES	NO	NO	intergenic	3.01842
239	2763285..2763741	2763455	457	17.4639	1.34957e-68	250	outside	MXAN_RS11485	MXAN_2376	hypothetical protein	2763705	2764073	YES	YES	YES	coding	2.98489
240	1594369..1594712	1594547	344	17.3718	6.74496e-68	98	outside	MXAN_RS06580	MXAN_1359	WYL domain-containing protein	1594645	1595667	YES	YES	YES	intergenic	2.64821
241	253297..253802	253635	506	17.3709	6.85788e-68	744	outside	MXAN_RS01025	MXAN_0207	hypothetical protein	252891	253361	YES	YES	NO	intergenic	3.00305
242	6249408..6249752	6249578	345	17.3412	1.14967e-67	344	inside	MXAN_RS24275	MXAN_4999	hypothetical protein	6249922	6248402	NO	NO	NO	coding	2.87265
243	911334..911693	911524	360	17.3226	1.58954e-67	267	outside	MXAN_RS03840	no in old annotation	hypothetical protein	911257	910949	NO	NO	NO	intergenic	2.97323
244	1585017..1585470	1585301	454	17.3145	1.82994e-67	42	outside	MXAN_RS06535	MXAN_1350	two-component sensor histidine kinase	1585259	1583730	NO	NO	NO	intergenic	3.08017
245	7904559..7904911	7904744	353	17.2882	2.88692e-67	120	outside	MXAN_RS31085	MXAN_6418	hypothetical protein	7904624	7904019	NO	NO	NO	coding	2.78533
246	6329359..6329700	6329529	342	17.2638	4.40237e-67	29	outside	MXAN_RS24555	MXAN_5055	methyltransferase domain-containing protein	6329500	6323456	YES	YES	YES	coding	2.74127
247	1667685..1668112	1667946	428	17.2403	6.6221e-67	38	outside	MXAN_RS06880	no in old annotation	hypothetical protein	1667984	1668331	YES	YES	YES	intergenic	3.05373
248	7063041..7063393	7063224	353	17.2322	7.60598e-67	377	inside	MXAN_RS27610	MXAN_5696	serine/threonine protein kinase	7063601	7061079	NO	NO	NO	coding	2.68425
249	9101214..9101659	9101490	446	17.2304	7.85006e-67	271	outside	MXAN_RS36110	no in old annotation	hypothetical protein	9101219	9101025	YES	YES	NO	intergenic	2.54649
250	6834570..6834940	6834740	371	17.1883	1.62332e-66	201	outside	MXAN_RS26620	MXAN_5490	hypothetical protein	6834539	6833268	NO	NO	NO	intergenic	2.974
251	7409920..7410288	7410090	369	17.1629	2.51699e-66	232	inside	MXAN_RS29030	MXAN_5984	hypothetical protein	7409858	7410268	YES	YES	YES	coding	2.73365
252	2636747..2637086	2636917	340	17.1536	2.95507e-66	240	inside	MXAN_RS10975	MXAN_2271	hypothetical protein	2637157	2636687	NO	NO	NO	coding	3.03126
253	6405148..6405503	6405317	356	17.1294	4.47915e-66	274	inside	MXAN_RS24915	MXAN_5127	aromatic amino acid hydroxylase	6405591	6404014	YES	YES	NO	coding	2.59212
254	5094658..5095099	5094828	442	17.1209	5.18633e-66	228	inside	MXAN_RS20135	MXAN_4147	sigma-70 family RNA polymerase sigma factor	5094600	5095241	YES	NO	NO	coding	2.84918
255	6560801..6561176	6560969	376	17.1089	6.37191e-66	400	inside	MXAN_RS25570	MXAN_5265	DUF1929 domain-containing protein	6560569	6563121	NO	NO	NO	coding	3.16426
256	3737722..3738062	3737892	341	17.1027	7.07992e-66	29	inside	MXAN_RS15455	MXAN_3191	hypothetical protein	3737921	3736830	YES	NO	NO	coding	2.75743
257	8227285..8227726	8227455	442	17.1009	7.30681e-66	167	outside	MXAN_RS32380	MXAN_6688	cyclic nucleotide-binding domain-containing protein	8227622	8229010	YES	NO	NO	coding	2.66297
258	5918005..5918394	5918225	390	17.0883	9.0751e-66	143	inside	MXAN_RS22945	MXAN_4723	LpxI family protein	5918368	5917562	YES	YES	YES	coding	2.6151
259	4414948..4415324	4415117	377	17.0767	1.10715e-65	111	inside	MXAN_RS17955	MXAN_3702	transcriptional repressor	4415006	4415425	YES	NO	NO	coding	3.33961
260	5223207..5223552	5223383	346	17.0527	1.66906e-65	331	outside	MXAN_RS20680	MXAN_4260	hypothetical protein	5223052	5222639	NO	NO	NO	coding	2.87821
261	2504328..2504673	2504504	346	17.029	2.50388e-65	59	outside	MXAN_RS10470	MXAN_2165	hypothetical protein	2504445	2504095	YES	YES	NO	intergenic	3.28668
262	7561853..7562210	7562023	358	17.0231	2.76897e-65	152	outside	MXAN_RS29670	MXAN_6116	hypothetical protein	7562175	7563434	YES	YES	YES	coding	2.97679
263	8957632..8958003	8957834	372	16.9976	4.27412e-65	87	outside	MXAN_RS35500	MXAN_7335	hypothetical protein	8957921	8958346	NO	NO	NO	intergenic	2.58313
264	2743317..2743681	2743512	365	16.986	5.21058e-65	97	inside	MXAN_RS11400	no in old annotation	hypothetical protein	2743609	2743355	NO	NO	NO	coding	2.62803
265	1727272..1727693	1727442	422	16.9693	6.93253e-65	79	outside	MXAN_RS07115	MXAN_1466	isopenicillin N synthase family oxygenase	1727363	1726401	YES	YES	YES	intergenic	2.88753
266	4574084..4574460	4574254	377	16.9688	6.99119e-65	685	outside	MXAN_RS18470	MXAN_3807	lipid A deacylase LpxR family protein	4573569	4572496	NO	NO	NO	coding	2.8964
267	6311489..6311988	6311652	500	16.9608	8.00443e-65	511	inside	MXAN_RS24510	MXAN_5045	serine/threonine-protein kinase	6311141	6314812	NO	NO	NO	coding	2.90345
268	6375847..6376228	6376059	382	16.9598	8.14866e-65	111	outside	MXAN_RS24785	MXAN_5101	RNA polymerase	6375948	6375397	YES	NO	NO	intergenic	2.75352
269	4554211..4554562	4554393	352	16.9502	9.58399e-65	35	outside	MXAN_RS18380	MXAN_3788	TIGR02266 family protein	4554358	4553960	NO	NO	NO	coding	2.80357
270	8606301..8606668	8606500	368	16.9476	1.00188e-64	193	outside	MXAN_RS34040	MXAN_7032	hypothetical protein	8606693	8607562	NO	NO	NO	coding	2.76922
271	1277384..1277724	1277555	341	16.9365	1.21055e-64	312	outside	MXAN_RS05270	no in old annotation	hypothetical protein	1277243	1277010	NO	NO	NO	coding	2.59172
272	5730962..5731469	5731300	508	16.9015	2.19361e-64	328	inside	MXAN_RS22270	MXAN_4589	PEGA domain-containing protein	5730972	5732753	YES	YES	YES	coding	3.27124
273	1251162..1251535	1251366	374	16.8846	2.9223e-64	27	inside	MXAN_RS05160	MXAN_1075	phosphoribosyltransferase	1251339	1252082	YES	YES	NO	coding	2.70992
274	4401528..4401922	4401753	395	16.881	3.10409e-64	81	outside	MXAN_RS17895	MXAN_3689	hypothetical protein	4401834	4402532	YES	YES	NO	intergenic	3.02012
275	2132513..2132861	2132683	349	16.8527	5.01227e-64	0	outside	MXAN_RS08735	MXAN_1808	DEAD/DEAH box helicase	2132683	2137653	YES	YES	YES	intergenic	3.51013
276	7008384..7008726	7008557	343	16.8499	5.2543e-64	195	outside	MXAN_RS27340	MXAN_5641	YihY family inner membrane protein	7008752	7010137	YES	YES	NO	intergenic	2.67743
277	3866911..3867258	3867091	348	16.8438	5.82706e-64	71	outside	MXAN_RS16105	MXAN_3322	50S ribosomal protein L36	3867162	3867278	NO	NO	NO	intergenic	2.82215
278	2566891..2567270	2567060	380	16.8355	6.69832e-64	199	inside	MXAN_RS10740	MXAN_2225	lipase	2567259	2565934	YES	YES	YES	coding	2.6865
279	2237884..2238276	2238053	393	16.8209	8.58253e-64	867	outside	MXAN_RS09255	MXAN_1909	SAM-dependent methyltransferase	2238920	2240203	YES	NO	NO	coding	2.88424
280	7271173..7271517	7271348	345	16.8109	1.01504e-63	163	outside	MXAN_RS28415	MXAN_5861	hypothetical protein	7271511	7273172	YES	NO	NO	intergenic	2.60921
281	1787642..1788001	1787833	360	16.8026	1.16697e-63	76	outside	MXAN_RS07410	MXAN_1525	GGDEF domain-containing protein	1787909	1788790	NO	NO	NO	intergenic	2.71882
282	863873..864195	864043	323	16.7978	1.26602e-63	219	inside	MXAN_RS03645	MXAN_0755	serine/threonine protein kinase	864262	862505	NO	NO	NO	coding	2.7949
283	5219784..5220149	5219981	366	16.7949	1.32982e-63	25	inside	MXAN_RS20665	MXAN_4257	diguanylate cyclase	5219956	5221740	YES	YES	NO	coding	2.93289
284	8961176..8961522	8961346	347	16.7742	1.88409e-63	419	outside	MXAN_RS35520	MXAN_7340	hypothetical protein	8960927	8960403	YES	YES	YES	intergenic	2.67738
285	6443522..6443877	6443709	356	16.7696	2.03451e-63	122	outside	MXAN_RS25065	MXAN_5159	Hsp70 family protein	6443831	6445345	YES	NO	NO	intergenic	2.78887
286	763922..764271	764092	350	16.769	2.05769e-63	217	outside	MXAN_RS03220	MXAN_0665	TetR/AcrR family transcriptional regulator	764309	765076	YES	YES	NO	coding	2.68516
287	8132363..8132712	8132543	350	16.7503	2.81562e-63	2	outside	MXAN_RS31970	MXAN_6605	TIGR02266 family protein	8132541	8129101	YES	YES	YES	intergenic	2.78504
288	372704..373073	372906	370	16.7321	3.82511e-63	251	inside	MXAN_RS01550	MXAN_0316	N-acetyltransferase	373157	371958	YES	YES	YES	coding	2.87447
289	6098073..6098439	6098240	367	16.7212	4.59403e-63	79	inside	MXAN_RS23635	no in old annotation	adventurous gliding motility protein CglF	6098319	6098050	YES	NO	NO	coding	2.73571
290	3297169..3297673	3297339	505	16.6729	1.03166e-62	1296	outside	MXAN_RS13700	MXAN_2827	hypothetical protein	3298635	3298471	NO	NO	NO	intergenic	3.0614
291	7526843..7527349	7527013	507	16.6718	1.05128e-62	228	inside	MXAN_RS29495	MXAN_6080	NrfD family oxidoreductase membrane subunit	7526785	7528224	NO	NO	NO	coding	2.87503
292	8469209..8469575	8469379	367	16.6674	1.13104e-62	105	outside	MXAN_RS33480	MXAN_6915	phage holin family protein	8469274	8468870	YES	YES	YES	intergenic	2.71621
293	5894097..5894496	5894266	400	16.593	3.914e-62	1269	outside	MXAN_RS36930	no in old annotation		5892997	5893110	NO	NO	NO	intergenic	2.54702
294	8714323..8714685	8714492	363	16.5916	4.00498e-62	233	inside	MXAN_RS34560	MXAN_7138	CinA family protein	8714725	8714144	NO	NO	NO	coding	3.16168
295	8610419..8610805	8610589	387	16.5653	6.21269e-62	108	outside	MXAN_RS34060	MXAN_7037	chemotaxis protein MotB	8610697	8611584	YES	YES	NO	intergenic	2.46547
296	7523777..7524141	7523946	365	16.5472	8.38812e-62	359	inside	MXAN_RS29490	MXAN_6079	4Fe-4S dicluster domain-containing protein	7523587	7526781	NO	NO	NO	coding	2.66955
297	5941457..5941825	5941664	369	16.4894	2.18647e-61	138	outside	MXAN_RS23040	MXAN_4742	30S ribosomal protein S20	5941802	5942077	YES	YES	YES	intergenic	2.77097
298	2398464..2398812	2398634	349	16.4645	3.29764e-61	80	outside	MXAN_RS10035	MXAN_2068	translation initiation factor IF-2	2398714	2401932	NO	NO	NO	intergenic	2.928
299	5887531..5887873	5887705	343	16.449	4.2636e-61	329	outside	MXAN_RS22825	MXAN_4698	KamA family radical SAM protein	5887376	5886132	NO	NO	NO	coding	2.95332
300	3511686..3512193	3512024	508	16.4282	6.01158e-61	106	inside	MXAN_RS14490	MXAN_2992	glycosyltransferase	3512130	3508963	NO	NO	NO	coding	2.72838
301	6072234..6072733	6072564	500	16.406	8.66869e-61	12	outside	MXAN_RS23585	MXAN_4854	signal recognition particle protein	6072576	6074222	YES	NO	NO	intergenic	3.02554
302	6642440..6642809	6642610	370	16.3986	9.78768e-61	99	outside	MXAN_RS25895	MXAN_5336	oxidoreductase	6642709	6646488	NO	NO	NO	intergenic	2.52887
303	4595701..4596046	4595871	346	16.3924	1.08429e-60	67	outside	MXAN_RS18560	MXAN_3823	hypothetical protein	4595804	4594329	YES	YES	YES	intergenic	2.87299
304	8687657..8688004	8687827	348	16.3782	1.36962e-60	426	outside	MXAN_RS34450	no in old annotation	hypothetical protein	8688253	8688050	YES	YES	NO	coding	2.64584
305	7228733..7229098	7228930	366	16.3396	2.57779e-60	384	inside	MXAN_RS28270	MXAN_5831	glycogen/starch/alpha-glucan phosphorylase	7228546	7231050	NO	NO	NO	coding	2.79094
306	402409..402799	402579	391	16.3267	3.18687e-60	19	outside	MXAN_RS01680	MXAN_0343	TIGR02265 family protein	402560	401964	NO	NO	NO	coding	2.33442
307	6650470..6650897	6650640	428	16.2972	5.16181e-60	246	outside	MXAN_RS25920	MXAN_5341	ribosome recycling factor	6650394	6649837	NO	NO	NO	coding	2.63908
308	380668..381047	380881	380	16.244	1.23234e-59	1736	outside	MXAN_RS01590	MXAN_0324	DedA family protein	382617	382003	NO	NO	NO	intergenic	2.97135
309	8309502..8309889	8309672	388	16.1897	2.98091e-59	10	outside	MXAN_RS32730	MXAN_6759	sigma-70 family RNA polymerase sigma factor	8309662	8309027	NO	NO	NO	intergenic	2.68272
310	317008..317514	317346	507	16.1763	3.7084e-59	386	inside	MXAN_RS01300	MXAN_0265	PEGA domain-containing protein	317732	314955	NO	NO	NO	coding	2.4095
311	1003864..1004362	1004034	499	16.1296	7.90406e-59	22	outside	MXAN_RS04245	MXAN_0885	hypothetical protein	1004012	1003080	YES	YES	NO	intergenic	2.50611
312	7006598..7007047	7006768	450	16.0445	3.12268e-58	1170	inside	MXAN_RS27335	MXAN_5640	Rne/Rng family ribonuclease	7005598	7008408	YES	NO	NO	coding	2.54597
313	304727..305074	304909	348	16.0211	4.5483e-58	83	inside	MXAN_RS01255	MXAN_0256	alanine--glyoxylate aminotransferase family protein	304826	305986	YES	YES	YES	coding	2.18046
314	5871540..5871939	5871705	400	16.0204	4.59956e-58	473	inside	MXAN_RS22750	MXAN_4684	aspartate--tRNA ligase	5872178	5870358	NO	NO	NO	coding	2.64636
315	7452493..7452930	7452663	438	15.972	1.00186e-57	26	outside	MXAN_RS29215	MXAN_6022	DUF2378 family protein	7452689	7453225	YES	YES	NO	intergenic	2.74949
316	3602922..3603315	3603092	394	15.9163	2.44099e-57	327	outside	MXAN_RS14920	no in old annotation	DNA-directed RNA polymerase subunit beta'	3603419	3607630	NO	NO	NO	coding	2.48583
317	5256887..5257246	5257077	360	15.9077	2.80265e-57	2244	outside	MXAN_RS20815	MXAN_4291	acyl carrier protein	5254833	5255093	YES	YES	NO	coding	2.35755
318	8570060..8570482	8570313	423	15.8966	3.34278e-57	217	outside	MXAN_RS33910	MXAN_7005	hypothetical protein	8570096	8569449	NO	NO	NO	intergenic	2.70816
319	7176657..7176996	7176827	340	15.8896	3.74038e-57	275	inside	MXAN_RS28110	no in old annotation	hypothetical protein	7176552	7177700	YES	YES	YES	coding	2.86673
320	6025300..6025638	6025472	339	15.8596	6.03281e-57	355	outside	MXAN_RS23405	MXAN_4815	hypothetical protein	6025827	6026192	YES	NO	NO	coding	2.58105
321	7997018..7997521	7997356	504	15.8406	8.16739e-57	517	outside	MXAN_RS31420	MXAN_6486	MarR family transcriptional regulator	7997873	7997382	NO	NO	NO	coding	2.4269
322	7220996..7221345	7221176	350	15.7828	2.04391e-56	344	outside	MXAN_RS28245	MXAN_5826	PrkA protein	7221520	7223583	NO	NO	NO	intergenic	2.673
323	6832256..6832595	6832429	340	15.7801	2.13257e-56	145	outside	MXAN_RS26610	MXAN_5488	DUF1592 domain-containing protein	6832284	6830578	YES	NO	NO	intergenic	2.71195
324	1394984..1395349	1395182	366	15.7577	3.04232e-56	135	outside	MXAN_RS05750	MXAN_1193	DUF3857 domain-containing protein	1395047	1391388	YES	YES	YES	intergenic	2.80156
325	3562369..3562751	3562582	383	15.7466	3.62125e-56	44	inside	MXAN_RS14710	MXAN_3036	two-component sensor histidine kinase	3562538	3564061	NO	NO	NO	coding	2.35418
326	1290031..1290397	1290229	367	15.737	4.2193e-56	42	inside	MXAN_RS05320	MXAN_1106	molecular chaperone DnaJ	1290271	1287593	YES	NO	NO	coding	2.61968
327	3419152..3419506	3419322	355	15.7258	5.03347e-56	221	inside	MXAN_RS14140	MXAN_2919	O-antigen ligase domain-containing protein	3419101	3420426	YES	NO	NO	coding	2.33242
328	1721131..1721478	1721301	348	15.7131	6.15414e-56	393	inside	MXAN_RS07085	MXAN_1460	DNA translocase FtsK	1721694	1718503	NO	NO	NO	coding	2.63357
329	3637570..3638026	3637740	457	15.7093	6.52828e-56	151	outside	MXAN_RS15045	MXAN_3104	FHA domain-containing protein	3637891	3638757	NO	NO	NO	coding	2.49907
330	8924211..8924569	8924401	359	15.7035	7.15147e-56	25	inside	MXAN_RS35360	MXAN_7307	isopenicillin N synthase family oxygenase	8924426	8923047	YES	YES	YES	coding	2.97959
331	4941919..4942273	4942104	355	15.6884	9.07871e-56	145	inside	MXAN_RS19615	MXAN_4034	tetratricopeptide repeat protein	4941959	4944094	NO	NO	NO	coding	2.83825
332	6621013..6621419	6621183	407	15.6421	1.87954e-55	31	outside	MXAN_RS25805	no in old annotation	protoheme IX farnesyltransferase	6621152	6620268	NO	NO	NO	intergenic	2.76236
333	3008777..3009141	3008973	365	15.6211	2.61574e-55	25	inside	MXAN_RS12500	no in old annotation	hypothetical protein	3008998	3008537	YES	YES	YES	coding	2.39178
334	7488857..7489226	7489057	370	15.5919	4.13114e-55	80	outside	MXAN_RS29355	MXAN_6050	DNA mismatch repair protein MutT	7488977	7487283	YES	YES	NO	intergenic	2.23563
335	7798025..7798381	7798213	357	15.56	6.80189e-55	238	inside	MXAN_RS30605	MXAN_6317	serine/threonine protein kinase	7798451	7797360	YES	YES	NO	coding	2.6806
336	3038277..3038747	3038447	471	15.4716	2.69684e-54	52	outside	MXAN_RS12610	MXAN_2608	MFS transporter	3038395	3036941	NO	NO	NO	intergenic	2.62891
337	5829438..5829943	5829774	506	15.4663	2.92884e-54	443	outside	MXAN_RS22555	no in old annotation	exodeoxyribonuclease VII small subunit	5829331	5828975	YES	NO	NO	coding	2.87309
338	6299604..6299947	6299779	344	15.4576	3.35413e-54	229	inside	MXAN_RS24475	MXAN_5038	methyltransferase domain-containing protein	6299550	6300338	YES	YES	YES	coding	2.44615
339	6659958..6660394	6660128	437	15.4278	5.32595e-54	452	outside	MXAN_RS25955	MXAN_5348	M23 family metallopeptidase	6659676	6658759	NO	NO	NO	coding	2.66297
340	208848..209268	209018	421	15.3924	9.2015e-54	288	outside	MXAN_RS00860	MXAN_0174	methyl-accepting chemotaxis protein	209306	210898	YES	YES	NO	intergenic	2.45656
341	411293..411632	411464	340	15.3881	9.84175e-54	47	outside	MXAN_RS01715	no in old annotation	hypothetical protein	411511	412500	YES	YES	NO	intergenic	2.52215
342	1979254..1979596	1979423	343	15.3601	1.51596e-53	42	inside	MXAN_RS08115	MXAN_1673	hypothetical protein	1979465	1977924	NO	NO	NO	coding	2.75077
343	5334358..5334785	5334528	428	15.2663	6.41388e-53	10	inside	MXAN_RS21045	MXAN_4336	XRE family transcriptional regulator	5334518	5334793	YES	NO	NO	coding	2.45735
344	4088232..4088578	4088402	347	15.2548	7.64515e-53	215	outside	MXAN_RS17005	no in old annotation	signal peptidase I	4088617	4089873	NO	NO	NO	coding	2.59392
345	2303719..2304066	2303889	348	15.1958	1.88555e-52	81	inside	MXAN_RS09545	MXAN_1969	patatin	2303970	2302999	YES	YES	YES	coding	2.60064
346	2247037..2247379	2247210	343	15.1459	4.03177e-52	40	outside	MXAN_RS09290	MXAN_1916	hypothetical protein	2247170	2245905	YES	YES	YES	intergenic	2.75435
347	1836808..1837187	1837018	380	15.1337	4.85501e-52	153	outside	MXAN_RS07605	MXAN_1565	ATPase AAA	1837171	1838766	NO	NO	NO	intergenic	2.24582
348	1043189..1043540	1043374	352	15.0934	8.95345e-52	15	inside	MXAN_RS04385	MXAN_0913	alpha/beta hydrolase	1043359	1044165	NO	NO	NO	coding	2.63438
349	2408879..2409226	2409057	348	15.09	9.424e-52	63	inside	MXAN_RS10075	MXAN_2076	dUTP diphosphatase	2408994	2409449	NO	NO	NO	coding	2.36227
350	7684814..7685143	7684984	330	15.0813	1.07495e-51	69	outside	MXAN_RS30150	MXAN_6219	hypothetical protein	7685053	7685334	NO	NO	NO	intergenic	2.50324
351	4496620..4497013	4496844	394	15.0646	1.38343e-51	426	inside	MXAN_RS18320	MXAN_3776	hypothetical protein	4496418	4497065	NO	NO	NO	coding	2.63126
352	6905262..6905722	6905553	461	15.0239	2.55862e-51	366	inside	MXAN_RS26925	MXAN_5556	NrfD family oxidoreductase membrane subunit	6905919	6904441	NO	NO	NO	coding	2.43857
353	8436741..8437206	8437037	466	15.0153	2.91559e-51	895	inside	MXAN_RS33350	MXAN_6885	DUF4105 domain-containing protein	8437932	8435146	NO	NO	NO	coding	2.64139
354	4552801..4553290	4553121	490	14.9686	5.88606e-51	718	outside	MXAN_RS18370	MXAN_3786	VWA domain-containing protein	4552403	4551006	NO	NO	NO	coding	2.52869
355	6657200..6657541	6657370	342	14.9597	6.73479e-51	439	outside	MXAN_RS25950	MXAN_5347	diguanylate cyclase	6657809	6658513	NO	NO	NO	coding	2.03684
356	950979..951321	951149	343	14.937	9.46965e-51	515	inside	MXAN_RS04010	MXAN_0836	hypothetical protein	950634	951452	YES	NO	NO	coding	2.54102
357	6368329..6368668	6368499	340	14.9361	9.59975e-51	1112	inside	MXAN_RS24755	MXAN_5095	thiol oxidoreductase with 2 cytochrome C heme-binding sites	6367387	6368772	NO	NO	NO	coding	2.39581
358	5750518..5750862	5750693	345	14.9261	1.11435e-50	2831	inside	MXAN_RS22305	MXAN_4596	non-ribosomal peptide synthetase	5747862	5754008	YES	YES	YES	coding	2.927
359	3298145..3298462	3298315	318	14.87	2.58145e-50	320	outside	MXAN_RS13700	MXAN_2827	hypothetical protein	3298635	3298471	YES	YES	YES	intergenic	2.8529
360	7997582..7997930	7997752	349	14.8607	2.96494e-50	121	inside	MXAN_RS31420	MXAN_6486	MarR family transcriptional regulator	7997873	7997382	NO	NO	NO	coding	2.40323
361	6558229..6558577	6558421	349	14.8245	5.08413e-50	37	inside	MXAN_RS25560	MXAN_5263	RNA polymerase sigma factor	6558384	6558953	YES	YES	YES	coding	2.48297
362	6961407..6961813	6961577	407	14.7777	1.02066e-49	536	inside	MXAN_RS27130	no in old annotation	cell division protein FtsA	6962113	6960881	YES	NO	NO	coding	2.47633
363	4000768..4001134	4000965	367	14.7746	1.06827e-49	1470	inside	MXAN_RS16665	MXAN_3438	tetratricopeptide repeat protein	4002435	3997357	NO	NO	NO	coding	2.41978
364	3912014..3912385	3912184	372	14.7709	1.12772e-49	11	inside	MXAN_RS16305	MXAN_3367	hypothetical protein	3912173	3912646	YES	YES	NO	coding	2.91681
365	985297..985643	985474	347	14.7707	1.1324e-49	950	inside	MXAN_RS04165	MXAN_0869	triacylglycerol lipase	986424	985258	YES	NO	NO	coding	2.40045
366	1527231..1527597	1527428	367	14.723	2.29522e-49	21	inside	MXAN_RS06295	no in old annotation	hypothetical protein	1527407	1528186	YES	NO	NO	coding	2.62599
367	2388574..2388981	2388744	408	14.7198	2.40367e-49	54	inside	MXAN_RS09985	MXAN_2057	SsrA-binding protein SmpB	2388690	2389178	NO	NO	NO	coding	2.70782
368	906974..907327	907158	354	14.7	3.22302e-49	81	inside	MXAN_RS03820	MXAN_0794	DUF1615 domain-containing protein	907239	905881	YES	NO	NO	coding	2.46503
369	1250754..1251162	1250924	409	14.6965	3.39558e-49	415	outside	MXAN_RS05160	MXAN_1075	phosphoribosyltransferase	1251339	1252082	YES	NO	NO	coding	2.12159
370	7094199..7094634	7094369	436	14.6904	3.7131e-49	6	outside	MXAN_RS27760	MXAN_5727	hypothetical protein	7094375	7095106	YES	YES	YES	intergenic	2.69482
371	2916727..2917107	2916893	381	14.6524	6.5066e-49	312	inside	MXAN_RS12105	MXAN_2506	prepilin-type N-terminal cleavage/methylation domain-containing protein	2917205	2916534	YES	YES	NO	coding	2.41895
372	8749712..8750062	8749894	351	14.6442	7.33219e-49	37	inside	MXAN_RS34695	MXAN_7165	2-hydroxyacid dehydrogenase	8749931	8748915	YES	YES	YES	coding	2.40682
373	8095783..8096280	8095953	498	14.612	1.17775e-48	223	outside	MXAN_RS31830	MXAN_6570	serine/threonine protein kinase	8095730	8092146	YES	YES	NO	coding	2.35267
374	1598495..1598834	1598666	340	14.6118	1.18037e-48	455	inside	MXAN_RS06595	MXAN_1362	cardiolipin synthase B	1598211	1599572	YES	YES	NO	coding	2.51426
375	2892322..2892746	2892492	425	14.5394	3.40779e-48	537	inside	MXAN_RS12010	MXAN_2482	PEGA domain-containing protein	2893029	2891527	NO	NO	NO	coding	2.22239
376	8238123..8238527	8238292	405	14.5246	4.23182e-48	11	outside	MXAN_RS32425	no in old annotation	thiamine-phosphate kinase	8238281	8237334	YES	YES	NO	intergenic	2.76415
377	1937900..1938239	1938070	340	14.5181	4.65427e-48	653	outside	MXAN_RS07940	MXAN_1633	N-acetyltransferase	1938723	1939352	NO	NO	NO	coding	2.41153
378	9138378..9138765	9138548	388	14.4833	7.72401e-48	814	inside	MXAN_RS36260	MXAN_7514	HEAT repeat domain-containing protein	9137734	9139602	NO	NO	NO	coding	2.53874
379	1149016..1149430	1149186	415	14.4711	9.22916e-48	1	inside	MXAN_RS04775	MXAN_0993	response regulator	1149185	1150645	YES	YES	YES	coding	2.46169
380	7583592..7583964	7583761	373	14.4227	1.86363e-47	63	inside	MXAN_RS29755	no in old annotation	hypothetical protein	7583824	7583594	YES	YES	YES	coding	2.97844
381	3808683..3809053	3808884	371	14.4146	2.09566e-47	58	outside	MXAN_RS15760	MXAN_3254	cytochrome c maturation protein CcmE	3808826	3808350	NO	NO	NO	coding	2.66221
382	1331012..1331377	1331182	366	14.3778	3.56682e-47	135	outside	MXAN_RS05500	MXAN_1142	hypothetical protein	1331317	1333572	NO	NO	NO	coding	2.35669
383	3110366..3110722	3110553	357	14.3765	3.63581e-47	24	outside	MXAN_RS12890	MXAN_2664	hypothetical protein	3110577	3112142	YES	NO	NO	intergenic	2.11214
384	3018898..3019236	3019067	339	14.3634	4.3928e-47	373	outside	MXAN_RS12550	MXAN_2596	serine/threonine protein kinase	3019440	3021902	YES	YES	NO	coding	2.33333
385	852898..853237	853068	340	14.3595	4.64799e-47	146	inside	MXAN_RS03605	MXAN_0747	hypothetical protein	853214	852837	NO	NO	NO	coding	2.28428
386	8778565..8778895	8778735	331	14.3591	4.67382e-47	93	outside	MXAN_RS34835	MXAN_7194	SDR family NAD(P)-dependent oxidoreductase	8778642	8777638	YES	YES	NO	intergenic	2.28485
387	6703410..6703786	6703617	377	14.3564	4.85379e-47	728	outside	MXAN_RS26130	no in old annotation	hypothetical protein	6704345	6704686	YES	YES	YES	coding	2.47367
388	7081200..7081582	7081370	383	14.2938	1.19612e-46	416	outside	MXAN_RS27700	MXAN_5714	ABC transporter permease	7081786	7082715	NO	NO	NO	coding	2.54855
389	7565606..7565948	7565779	343	14.2698	1.68674e-46	386	outside	MXAN_RS29680	MXAN_6119	hypothetical protein	7565393	7565767	NO	NO	NO	intergenic	2.26053
390	527472..527943	527640	472	14.2389	2.62858e-46	271	inside	MXAN_RS02270	MXAN_0464	carboxypeptidase regulatory-like domain-containing protein	527911	527240	YES	NO	NO	coding	2.26072
391	7784347..7784817	7784649	471	14.2116	3.88215e-46	261	outside	MXAN_RS30555	MXAN_6307	chloride channel protein	7784910	7786943	NO	NO	NO	coding	2.45709
392	1656172..1656680	1656342	509	14.2002	4.56578e-46	521	outside	MXAN_RS06835	MXAN_1409	hypothetical protein	1656863	1658155	YES	NO	NO	coding	2.03336
393	3175891..3176276	3176107	386	14.1855	5.63489e-46	25	outside	MXAN_RS13205	MXAN_2726	NADH-quinone oxidoreductase subunit I	3176082	3175318	NO	NO	NO	intergenic	2.71741
394	2240755..2241101	2240925	347	14.1525	9.01047e-46	295	outside	MXAN_RS09265	MXAN_1911	serine hydrolase	2241220	2242401	NO	NO	NO	coding	2.27907
395	5970011..5970511	5970342	501	14.1525	9.01124e-46	149	outside	MXAN_RS23175	MXAN_4769	acyl carrier protein	5970193	5969951	YES	NO	NO	coding	2.22661
396	5144240..5144741	5144403	502	14.1265	1.30425e-45	256	outside	MXAN_RS20335	MXAN_4188	adenylate/guanylate cyclase domain-containing protein	5144147	5142777	NO	NO	NO	coding	2.44589
397	963191..963625	963361	435	14.1192	1.44705e-45	345	outside	MXAN_RS04060	MXAN_0847	hypothetical protein	963016	962441	NO	NO	NO	coding	2.18712
398	7789535..7790042	7789873	508	14.1085	1.68446e-45	408	outside	MXAN_RS30570	MXAN_6310	peroxiredoxin	7789465	7788935	YES	YES	YES	coding	2.23736
399	3929134..3929535	3929304	402	14.1028	1.82598e-45	279	outside	MXAN_RS16360	no in old annotation	translational GTPase TypA	3929025	3927178	NO	NO	NO	coding	2.27302
400	5130752..5131100	5130931	349	14.0995	1.91111e-45	987	inside	MXAN_RS20285	MXAN_4178	ATP-dependent Clp protease ATP-binding subunit	5129944	5132463	YES	YES	YES	coding	2.2839
401	7938666..7939005	7938836	340	14.0706	2.88096e-45	404	inside	MXAN_RS31165	MXAN_6435	peptidase M48	7938432	7939868	YES	YES	YES	coding	2.21063
402	1246690..1247092	1246855	403	14.0637	3.17567e-45	908	outside	MXAN_RS05140	MXAN_1071	single-stranded DNA-binding protein	1247763	1248260	NO	NO	NO	coding	2.19202
403	8256419..8256788	8256623	370	14.0596	3.36277e-45	179	inside	MXAN_RS32510	no in old annotation	type I methionyl aminopeptidase	8256802	8256020	NO	NO	NO	coding	2.38281
404	6835430..6835910	6835600	481	14.058	3.44212e-45	48	outside	MXAN_RS26625	MXAN_5491	hypothetical protein	6835552	6834797	YES	YES	NO	intergenic	2.43987
405	193144..193479	193310	336	14.046	4.07348e-45	109	inside	MXAN_RS00775	MXAN_0157	hypothetical protein	193419	192619	NO	NO	NO	coding	2.33893
406	5514391..5514734	5514565	344	13.9794	1.0414e-44	802	outside	MXAN_RS21635	MXAN_4454	cyclase	5515367	5514942	YES	NO	NO	intergenic	2.75291
407	5539024..5539526	5539194	503	13.9776	1.06751e-44	414	outside	MXAN_RS21725	MXAN_4473	IS3 family transposase	5538780	5538488	YES	YES	YES	intergenic	2.77672
408	8602349..8602731	8602519	383	13.9762	1.0891e-44	797	inside	MXAN_RS34020	MXAN_7028	F0F1 ATP synthase subunit alpha	8601722	8603269	NO	NO	NO	coding	2.40621
409	6355264..6355740	6355574	477	13.9746	1.11312e-44	490	outside	MXAN_RS24695	MXAN_5083	response regulator transcription factor	6356064	6356834	NO	NO	NO	coding	2.63923
410	6083543..6083911	6083713	369	13.9338	1.97302e-44	2835	outside	MXAN_RS23610	MXAN_4862	adventurous gliding motility protein GltJ	6080878	6078854	NO	NO	NO	coding	2.4437
411	334827..335187	335019	361	13.8939	3.44863e-44	470	outside	MXAN_RS01385	MXAN_0282	non-proteolytic archaemetzincin-like protein	335489	336016	YES	NO	NO	coding	2.15587
412	2259489..2259833	2259667	345	13.8388	7.43817e-44	271	inside	MXAN_RS09345	MXAN_1927	hypothetical protein	2259396	2261042	NO	NO	NO	coding	2.23478
413	8973802..8974156	8973987	355	13.8266	8.80954e-44	215	inside	MXAN_RS35585	MXAN_7353	3-ketoacyl-ACP synthase	8974202	8973090	NO	NO	NO	coding	2.11991
414	4090013..4090360	4090183	348	13.7334	3.20114e-43	224	inside	MXAN_RS17010	MXAN_3510	aspartate carbamoyltransferase	4089959	4090852	YES	NO	NO	coding	2.33547
415	61177..61564	61346	388	13.7182	3.95011e-43	319	inside	MXAN_RS00290	MXAN_0055	DUF2183 domain-containing protein	61027	62271	NO	NO	NO	coding	2.03084
416	958636..959011	958842	376	13.5778	2.71216e-42	270	inside	MXAN_RS04045	MXAN_0844	hypothetical protein	958572	961016	YES	YES	YES	coding	2.19417
417	6869999..6870470	6870169	472	13.5744	2.84058e-42	242	inside	MXAN_RS26760	MXAN_5519	serine hydrolase	6869927	6871144	YES	YES	YES	coding	2.19265
418	635814..636155	635986	342	13.5564	3.63222e-42	622	inside	MXAN_RS02680	MXAN_0552	PEGA domain-containing protein	636608	634938	NO	NO	NO	coding	2.21322
419	3193852..3194244	3194022	393	13.5403	4.52077e-42	838	outside	MXAN_RS13285	MXAN_2741	hypothetical protein	3193184	3193777	NO	NO	NO	coding	2.36405
420	3603521..3603921	3603691	401	13.5343	4.90571e-42	272	inside	MXAN_RS14920	no in old annotation	DNA-directed RNA polymerase subunit beta'	3603419	3607630	NO	NO	NO	coding	2.59342
421	64720..65066	64897	347	13.5147	6.40671e-42	275	inside	MXAN_RS00300	MXAN_0057	hypothetical protein	64622	65146	YES	NO	NO	coding	2.05025
422	6133698..6134051	6133868	354	13.4851	9.57099e-42	2102	inside	MXAN_RS23795	no in old annotation	chromosome segregation protein SMC	6135970	6132368	YES	YES	NO	coding	2.39298
423	3392488..3392832	3392664	345	13.458	1.38163e-41	36	outside	MXAN_RS14050	MXAN_2901	radical SAM protein	3392628	3391906	YES	YES	NO	intergenic	2.46906
424	1607464..1607817	1607634	354	13.4556	1.42777e-41	99	outside	MXAN_RS06610	MXAN_1365	hypothetical protein	1607535	1603051	NO	NO	NO	coding	2.10362
425	509682..510081	509852	400	13.4355	1.87235e-41	591	outside	MXAN_RS02180	no in old annotation	hypothetical protein	510443	511027	YES	YES	YES	coding	2.47175
426	7101316..7101675	7101506	360	13.4022	2.93622e-41	57	inside	MXAN_RS27795	MXAN_5735	signal recognition particle-docking protein FtsY	7101449	7103014	NO	NO	NO	coding	2.09011
427	3470054..3470406	3470237	353	13.3731	4.3431e-41	92	outside	MXAN_RS14340	MXAN_2961	HAMP domain-containing histidine kinase	3470145	3469120	YES	YES	NO	intergenic	2.20062
428	1725310..1725686	1725480	377	13.338	6.95342e-41	914	inside	MXAN_RS07110	MXAN_1465	carbon-nitrogen hydrolase family protein	1726394	1725360	NO	NO	NO	coding	2.27578
429	5993509..5993890	5993671	382	13.3374	7.01679e-41	171	outside	MXAN_RS23305	MXAN_4795	HlyC/CorC family transporter	5993842	5995125	NO	NO	NO	coding	2.04198
430	7529193..7529570	7529363	378	13.3199	8.86759e-41	1	inside	MXAN_RS29510	MXAN_6083	hypothetical protein	7529362	7530606	NO	NO	NO	coding	2.19099
431	4388955..4389339	4389115	385	13.2895	1.33094e-40	94	outside	MXAN_RS17840	MXAN_3678	polyprenyl synthetase family protein	4389209	4390207	NO	NO	NO	intergenic	2.35024
432	1016381..1016723	1016556	343	13.2625	1.90897e-40	45	outside	MXAN_RS04270	MXAN_0890	hypothetical protein	1016511	1015867	NO	NO	NO	intergenic	2.07923
433	2367325..2367689	2367521	365	13.2624	1.91334e-40	218	outside	MXAN_RS09880	MXAN_2037	hypothetical protein	2367739	2368737	NO	NO	NO	coding	2.3604
434	6125265..6125612	6125443	348	13.2305	2.92461e-40	78	outside	MXAN_RS23760	MXAN_4894	co-chaperone GroES	6125521	6125811	NO	NO	NO	intergenic	2.12075
435	1004906..1005245	1005076	340	13.2278	3.03082e-40	1005	inside	MXAN_RS04250	MXAN_0886	amidohydrolase	1004071	1008723	NO	NO	NO	coding	2.36257
436	431445..431788	431619	344	13.1554	7.92718e-40	54	inside	MXAN_RS01790	MXAN_0364	hypothetical protein	431673	430873	YES	NO	NO	coding	2.05247
437	4438953..4439305	4439141	353	13.1491	8.60999e-40	365	outside	MXAN_RS18065	no in old annotation	phosphatidylserine decarboxylase	4439506	4440348	NO	NO	NO	coding	2.08049
438	1446764..1447133	1446964	370	13.1364	1.01897e-39	123	outside	MXAN_RS05955	MXAN_1234	protein kinase	1447087	1448301	YES	NO	NO	coding	2.22764
439	9029343..9029692	9029523	350	13.0848	2.01111e-39	346	outside	MXAN_RS35825	MXAN_7406	glycoside hydrolase family 15 protein	9029869	9031662	YES	YES	YES	intergenic	2.23704
440	1708796..1709136	1708971	341	13.0377	3.73481e-39	1305	inside	MXAN_RS07035	MXAN_1450	TonB-dependent receptor	1707666	1711064	YES	NO	NO	coding	2.30362
441	1413063..1413405	1413241	343	13.0179	4.8421e-39	1393	outside	MXAN_RS05805	MXAN_1204	hypothetical protein	1411848	1411318	YES	NO	NO	coding	2.4235
442	3718551..3718903	3718735	353	13.0085	5.47288e-39	45	inside	MXAN_RS15385	MXAN_3174	hypothetical protein	3718690	3719385	NO	NO	NO	coding	2.20037
443	7251373..7251714	7251545	342	12.9842	7.52431e-39	30	outside	MXAN_RS28325	MXAN_5844	DNA polymerase III subunit alpha	7251515	7247958	YES	YES	NO	intergenic	2.33931
444	4135191..4135696	4135527	506	12.97	9.04848e-39	11	outside	MXAN_RS17220	no in old annotation	16S rRNA (cytidine(1402)-2'-O)-methyltransferase	4135538	4136368	NO	NO	NO	intergenic	2.0964
445	7963701..7964099	7963861	399	12.9507	1.16466e-38	9	outside	MXAN_RS31275	MXAN_6458	DedA family protein	7963852	7963232	NO	NO	NO	intergenic	2.09311
446	5119046..5119359	5119215	314	12.9273	1.57879e-38	213	inside	MXAN_RS20235	MXAN_4168	hypothetical protein	5119002	5119523	NO	NO	NO	coding	2.23213
447	6868506..6868947	6868676	442	12.9154	1.84343e-38	49	inside	MXAN_RS26750	MXAN_5517	serine/threonine protein kinase	6868627	6869541	NO	NO	NO	coding	2.24998
448	3491669..3492011	3491842	343	12.9129	1.90466e-38	323	outside	MXAN_RS14415	MXAN_2976	tyrosine--tRNA ligase	3491519	3490257	YES	YES	NO	coding	2.17526
449	4836141..4836531	4836362	391	12.8972	2.33514e-38	270	outside	MXAN_RS19305	MXAN_3971	hypothetical protein	4836092	4834386	NO	NO	NO	coding	2.0268
450	2407626..2407971	2407796	346	12.8504	4.27698e-38	113	outside	MXAN_RS10070	MXAN_2075	M23 family metallopeptidase	2407909	2408925	NO	NO	NO	coding	2.311
451	260209..260551	260379	343	12.8478	4.42435e-38	161	outside	MXAN_RS01045	MXAN_0212	PLP-dependent aminotransferase family protein	260218	258998	NO	NO	NO	coding	2.07293
452	6005926..6006278	6006095	353	12.8316	5.45582e-38	386	outside	MXAN_RS23335	MXAN_4801	type VI secretion system lipoprotein TssJ	6006481	6007098	YES	NO	NO	coding	2.07834
453	5516000..5516339	5516170	340	12.8196	6.36505e-38	204	inside	MXAN_RS21640	no in old annotation	class II fructose-bisphosphatase	5516374	5515409	NO	NO	NO	coding	2.40972
454	1735150..1735656	1735319	507	12.8169	6.59502e-38	111	outside	MXAN_RS07160	MXAN_1475	hypothetical protein	1735430	1736419	NO	NO	NO	coding	2.01222
455	2731648..2732134	2731818	487	12.8161	6.66599e-38	116	inside	MXAN_RS11350	no in old annotation	peptide-methionine (R)-S-oxide reductase MsrB	2731934	2731512	NO	NO	NO	coding	2.24655
456	4050731..4051104	4050936	374	12.8144	6.80693e-38	18	inside	MXAN_RS16830	MXAN_3471	hypothetical protein	4050918	4052693	YES	YES	NO	coding	2.56675
457	7189102..7189454	7189285	353	12.8023	7.96102e-38	9	outside	MXAN_RS28125	MXAN_5802	alanine--tRNA ligase	7189294	7191990	YES	YES	NO	intergenic	2.56828
458	1524352..1524716	1524547	365	12.7958	8.65595e-38	31	inside	MXAN_RS06280	MXAN_1299	hypothetical protein	1524516	1525097	NO	NO	NO	coding	2.25747
459	6295697..6296015	6295859	319	12.7848	9.96347e-38	152	outside	MXAN_RS24460	MXAN_5035	insulinase family protein	6296011	6297342	YES	NO	NO	coding	2.17766
460	1602851..1603287	1603119	437	12.738	1.81894e-37	129	outside	MXAN_RS06605	MXAN_1364	HD domain-containing protein	1602990	1602568	NO	NO	NO	coding	2.36665
461	841016..841412	841249	397	12.6949	3.15624e-37	781	inside	MXAN_RS03555	MXAN_0736	PAS domain S-box protein	842030	840186	NO	NO	NO	coding	2.15381
462	348099..348451	348283	353	12.5868	1.24749e-36	131	inside	MXAN_RS01435	MXAN_0293	hypothetical protein	348152	348445	YES	YES	YES	coding	2.42626
463	3767304..3767640	3767476	337	12.5834	1.30255e-36	281	outside	MXAN_RS15580	no in old annotation	caspase family protein	3767757	3770012	YES	NO	NO	coding	2.53542
464	374149..374619	374319	471	12.5509	1.9662e-36	88	inside	MXAN_RS01560	no in old annotation	adenosylmethionine--8-amino-7-oxononanoate transaminase	374231	375562	NO	NO	NO	coding	2.21521
465	7539453..7539841	7539623	389	12.498	3.82582e-36	348	outside	MXAN_RS29565	MXAN_6096	YkgJ family cysteine cluster protein	7539971	7540318	NO	NO	NO	coding	2.18
466	3012608..3012958	3012789	351	12.4969	3.88028e-36	312	inside	MXAN_RS12515	MXAN_2588	molybdopterin-synthase adenylyltransferase MoeB	3013101	3011902	YES	YES	YES	coding	2.29462
467	1700733..1701107	1700938	375	12.4946	3.99717e-36	362	inside	MXAN_RS06995	MXAN_1442	NAD(P)/FAD-dependent oxidoreductase	1700576	1701961	NO	NO	NO	coding	2.08263
468	2896967..2897314	2897137	348	12.4931	4.06937e-36	341	inside	MXAN_RS12020	MXAN_2485	DNA topoisomerase IV subunit A	2897478	2895037	YES	NO	NO	coding	2.01582
469	8303166..8303621	8303336	456	12.4816	4.70568e-36	87	outside	MXAN_RS32690	MXAN_6751	hypothetical protein	8303249	8301837	NO	NO	NO	intergenic	2.16684
470	476162..476578	476332	417	12.438	8.13051e-36	265	inside	MXAN_RS02020	MXAN_0415	type IV pilus twitching motility protein PilT	476067	477161	YES	YES	YES	coding	2.06683
471	7302444..7302887	7302718	444	12.4228	9.83083e-36	80	outside	MXAN_RS28525	MXAN_5883	acetyl-CoA C-acetyltransferase	7302638	7301442	YES	YES	YES	coding	2.0674
472	5644788..5645130	5644958	343	12.4016	1.28067e-35	893	inside	MXAN_RS21975	MXAN_4530	type I polyketide synthase	5645851	5638598	YES	NO	NO	coding	2.44931
473	8605668..8606043	8605838	376	12.3915	1.45279e-35	855	outside	MXAN_RS34040	MXAN_7032	hypothetical protein	8606693	8607562	NO	NO	NO	coding	2.0954
474	5810694..5811032	5810866	339	12.3911	1.45916e-35	212	inside	MXAN_RS22470	MXAN_4629	L-aspartate oxidase	5810654	5812243	YES	YES	NO	coding	2.1481
475	4458548..4458887	4458728	340	12.3854	1.56685e-35	655	inside	MXAN_RS18165	MXAN_3744	transporter	4458073	4459827	NO	NO	NO	coding	2.26065
476	6236222..6236570	6236401	349	12.3741	1.80357e-35	1418	outside	MXAN_RS36970	MXAN_4985	hypothetical protein	6234983	6234795	NO	NO	NO	coding	2.50901
477	5820593..5820956	5820789	364	12.3599	2.15235e-35	271	outside	MXAN_RS22520	MXAN_4639	tetratricopeptide repeat protein	5820518	5818644	YES	NO	NO	coding	2.11161
478	4457355..4457792	4457623	438	12.3297	3.13289e-35	205	inside	MXAN_RS18160	MXAN_3743	class I fructose-bisphosphate aldolase	4457828	4456905	NO	NO	NO	coding	2.06045
479	6890960..6891394	6891130	435	12.319	3.58066e-35	680	inside	MXAN_RS26850	MXAN_5541	cytochrome-c oxidase, cbb3-type subunit I	6891810	6889429	NO	NO	NO	coding	2.11151
480	2777455..2777832	2777672	378	12.2924	4.97775e-35	13	inside	MXAN_RS11550	no in old annotation	excinuclease ABC subunit A	2777659	2782962	YES	YES	NO	coding	2.28575
481	8783586..8783973	8783810	388	12.256	7.79962e-35	259	outside	MXAN_RS34855	MXAN_7199	hypothetical protein	8784069	8786018	NO	NO	NO	coding	2.03272
482	7521847..7522192	7522015	346	12.1767	2.06908e-34	146	outside	MXAN_RS29480	MXAN_6077	HNH endonuclease	7522161	7522526	NO	NO	NO	coding	2.01668
483	4853902..4854289	4854120	388	12.1683	2.29215e-34	223	outside	MXAN_RS19380	MXAN_3986	ABC-F family ATP-binding cassette domain-containing protein	4854343	4855845	YES	YES	NO	intergenic	2.12137
484	4468691..4469037	4468868	347	12.1624	2.46552e-34	537	outside	MXAN_RS18205	MXAN_3752	class I SAM-dependent methyltransferase	4469405	4470133	NO	NO	NO	coding	2.10535
485	6189204..6189567	6189398	364	12.1549	2.70224e-34	337	outside	MXAN_RS24015	MXAN_4946	GlsB/YeaQ/YmgE family stress response membrane protein	6189735	6189487	NO	NO	NO	coding	2.41269
486	6622426..6622930	6622763	505	12.1505	2.85188e-34	1232	inside	MXAN_RS25810	MXAN_5319	tetratricopeptide repeat protein	6623995	6621470	NO	NO	NO	coding	2.14886
487	7585007..7585461	7585177	455	12.1269	3.80403e-34	465	outside	MXAN_RS29765	MXAN_6140	DUF2079 domain-containing protein	7585642	7587027	YES	YES	NO	intergenic	2.80353
488	8693350..8693856	8693687	507	11.9642	2.73699e-33	563	inside	MXAN_RS34470	MXAN_7120	hypothetical protein	8693124	8694185	NO	NO	NO	coding	2.48015
489	3593043..3593384	3593213	342	11.9201	4.65213e-33	295	outside	MXAN_RS14870	no in old annotation	elongation factor Tu	3593508	3594698	NO	NO	NO	intergenic	2.29373
490	5351680..5352038	5351869	359	11.9173	4.81035e-33	228	inside	MXAN_RS21095	MXAN_4346	class II glutamine amidotransferase	5351641	5352474	NO	NO	NO	coding	2.33498
491	3321783..3322263	3321929	481	11.9105	5.215e-33	0	outside	MXAN_RS13805	MXAN_2850	hypothetical protein	3321929	3320076	YES	NO	NO	intergenic	2.46375
492	8054081..8054508	8054340	428	11.8913	6.56694e-33	77	outside	MXAN_RS31670	MXAN_6536	peroxiredoxin	8054417	8054920	NO	NO	NO	intergenic	2.10254
493	5804930..5805270	5805101	341	11.8423	1.17962e-32	8	outside	MXAN_RS22430	MXAN_4621	O-antigen biosynthesis protein RfbC	5805093	5801266	YES	NO	NO	intergenic	2.21632
494	534615..535106	534784	492	11.8189	1.55799e-32	16	inside	MXAN_RS02305	MXAN_0471	CBS domain-containing protein	534768	535109	NO	NO	NO	coding	2.19689
495	8928902..8929315	8929064	414	11.7912	2.16729e-32	586	inside	MXAN_RS35370	MXAN_7309	hypothetical protein	8929650	8926006	NO	NO	NO	coding	2.09998
496	7166035..7166498	7166194	464	11.7681	2.84937e-32	652	inside	MXAN_RS28060	no in old annotation	type IV-A pilus assembly ATPase PilB	7166846	7165146	NO	NO	NO	coding	2.04217
497	4348862..4349205	4349032	344	11.768	2.85279e-32	283	outside	MXAN_RS17685	MXAN_3645	(2,3-dihydroxybenzoyl)adenylate synthase	4348749	4347103	NO	NO	NO	coding	2.16451
498	7478530..7478912	7478743	383	11.7351	4.21142e-32	50	outside	MXAN_RS29320	MXAN_6043	serine/threonine protein kinase	7478793	7480430	YES	YES	NO	intergenic	2.30117
499	1285678..1286014	1285848	337	11.7227	4.87503e-32	48	outside	MXAN_RS05305	MXAN_1103	amidophosphoribosyltransferase	1285800	1284364	NO	NO	NO	intergenic	2.09128
500	250769..251127	250958	359	11.7216	4.94225e-32	116	outside	MXAN_RS01015	MXAN_0205	diacylglyceryl transferase	250842	250000	NO	NO	NO	intergenic	2.23831
501	4937926..4938300	4938091	375	11.7159	5.286e-32	1202	inside	MXAN_RS19595	MXAN_4030	carboxypeptidase regulatory-like domain-containing protein	4939293	4936678	NO	NO	NO	coding	2.20037
502	8681008..8681492	8681178	485	11.7136	5.43141e-32	184	outside	MXAN_RS34420	MXAN_7110	FKBP-type peptidyl-prolyl cis-trans isomerase	8680994	8680215	NO	NO	NO	intergenic	2.00571
503	5554428..5554818	5554598	391	11.7006	6.32671e-32	91	outside	MXAN_RS21805	MXAN_4488	DUF4157 domain-containing protein	5554689	5559779	NO	NO	NO	intergenic	2.34947
504	22211..22578	22409	368	11.6848	7.62401e-32	62	outside	MXAN_RS00110	MXAN_0019	tenascin-X	22471	24672	NO	NO	NO	intergenic	2.03407
505	2978608..2978951	2978788	344	11.6846	7.64061e-32	31	inside	MXAN_RS12370	no in old annotation	tRNA (adenosine(37)-N6)-threonylcarbamoyltransferase complex dimerization subunit type 1 TsaB	2978757	2979524	NO	NO	NO	coding	2.24865
506	3102640..3102982	3102808	343	11.6414	1.26887e-31	894	inside	MXAN_RS12865	MXAN_2659	hypothetical protein	3103702	3102167	YES	YES	NO	coding	2.19094
507	7404756..7405159	7404991	404	11.6257	1.52555e-31	124	inside	MXAN_RS29010	MXAN_5980	tRNA 2-thiocytidine(32) synthetase TtcA	7405115	7404261	NO	NO	NO	coding	2.08383
508	2460717..2461170	2460887	454	11.5777	2.67151e-31	26	outside	MXAN_RS10305	no in old annotation	hypothetical protein	2460913	2461437	YES	YES	NO	intergenic	2.23349
509	6142296..6142642	6142473	347	11.5517	3.61786e-31	143	inside	MXAN_RS23825	no in old annotation	UDP-N-acetylglucosamine 1-carboxyvinyltransferase	6142330	6143592	YES	NO	NO	coding	2.10666
510	9048398..9048776	9048568	379	11.5427	4.02039e-31	55	inside	MXAN_RS35915	MXAN_7425	DUF2379 domain-containing protein	9048513	9048887	NO	NO	NO	coding	2.05836
511	695316..695763	695604	448	11.5249	4.94315e-31	272	outside	MXAN_RS02920	MXAN_0602	cytochrome oxidase assembly protein	695332	694361	NO	NO	NO	intergenic	2.26534
512	7454623..7454983	7454824	361	11.522	5.11011e-31	144	outside	MXAN_RS29230	MXAN_6025	ATP-dependent Clp protease adaptor ClpS	7454968	7455291	YES	NO	NO	coding	2.12847
513	1965258..1965624	1965462	367	11.4931	7.14063e-31	354	inside	MXAN_RS08075	MXAN_1664	DHA2 family efflux MFS transporter permease subunit	1965108	1966604	NO	NO	NO	coding	2.0689
514	4524203..4524536	4524391	334	11.4197	1.6661e-30	22346	outside	MXAN_RS18340	MXAN_3780	patatin-like phospholipase family protein	4546737	4544092	NO	NO	NO	coding	2.00346
515	7010561..7011008	7010731	448	11.3962	2.18392e-30	468	outside	MXAN_RS27345	MXAN_5642	integration host factor subunit beta	7010263	7010616	NO	NO	NO	coding	2.01282
516	8088243..8088576	8088413	334	11.387	2.42841e-30	154	inside	MXAN_RS31815	MXAN_6567	DUF1275 domain-containing protein	8088259	8089050	NO	NO	NO	coding	2.0268
517	6882476..6882841	6882672	366	11.3622	3.22449e-30	233	inside	MXAN_RS37080	no in old annotation	hypothetical protein	6882905	6882543	NO	NO	NO	coding	2.004
518	5877349..5877695	5877519	347	11.3225	5.07624e-30	687	outside	MXAN_RS22775	MXAN_4689	hypothetical protein	5876832	5877446	NO	NO	NO	intergenic	2.00631
519	2260499..2261001	2260837	503	11.2729	8.92934e-30	202	outside	MXAN_RS09350	MXAN_1928	hypothetical protein	2261039	2263009	YES	YES	NO	coding	2.04239
520	4578394..4578897	4578564	504	11.2727	8.94781e-30	443	inside	MXAN_RS18490	MXAN_3810	CocE/NonD family hydrolase	4579007	4577070	NO	NO	NO	coding	2.20776
521	1772094..1772427	1772263	334	11.2341	1.38724e-29	118	outside	MXAN_RS07330	MXAN_1509	metallophosphatase	1772145	1771438	NO	NO	NO	intergenic	2.05472
522	8796589..8797019	8796759	431	11.1895	2.29491e-29	582	inside	MXAN_RS34885	MXAN_7206	response regulator	8797341	8793202	NO	NO	NO	coding	2.03185
523	5182416..5182753	5182578	338	11.1761	2.66822e-29	192	outside	MXAN_RS20495	MXAN_4221	hypothetical protein	5182386	5181937	YES	YES	NO	intergenic	2.08499
524	2919977..2920320	2920151	344	11.1677	2.93513e-29	446	outside	MXAN_RS12125	no in old annotation	type II secretion system protein GspG	2919705	2919280	NO	NO	NO	coding	2.0466
525	1807952..1808326	1808118	375	11.1359	4.19463e-29	179	inside	MXAN_RS07475	MXAN_1540	hypothetical protein	1808297	1807638	YES	YES	YES	coding	2.24709
526	4073311..4073653	4073486	343	11.0799	7.85025e-29	1446	outside	MXAN_RS16935	MXAN_3495	fatty acid desaturase	4074932	4073904	NO	NO	NO	intergenic	2.08466
527	2282825..2283163	2282996	339	11.015	1.61712e-28	294	outside	MXAN_RS09450	MXAN_1948	tetratricopeptide repeat protein	2283290	2287570	NO	NO	NO	intergenic	2.02722
528	3450468..3450916	3450638	449	10.9487	3.37112e-28	184	outside	MXAN_RS14235	MXAN_2938	chitin-binding protein	3450454	3449300	YES	YES	NO	coding	2.17688
529	4484216..4484607	4484385	392	10.8877	6.59514e-28	279	outside	MXAN_RS18275	MXAN_3767	tetratricopeptide repeat protein	4484664	4485467	YES	NO	NO	coding	2.22479
530	4404571..4404916	4404747	346	10.8659	8.376e-28	15	outside	MXAN_RS17905	MXAN_3691	DUF4382 domain-containing protein	4404732	4403668	YES	YES	YES	coding	2.00392
531	6038456..6038791	6038604	336	10.8265	1.28953e-27	699	outside	MXAN_RS23450	MXAN_4825	ATP-dependent Clp protease ATP-binding subunit	6039303	6041597	NO	NO	NO	coding	2.07841
532	2499307..2499672	2499477	366	10.8095	1.55218e-27	1635	inside	MXAN_RS10450	MXAN_2160	PEGA domain-containing protein	2497842	2500808	NO	NO	NO	coding	2.01511
533	4063340..4063828	4063498	489	10.7722	2.32876e-27	274	inside	MXAN_RS16880	MXAN_3482	hypothetical protein	4063772	4062633	YES	NO	NO	coding	2.02148
534	8630364..8630761	8630598	398	10.7379	3.37827e-27	545	outside	MXAN_RS34150	MXAN_7054	DUF2892 domain-containing protein	8631143	8630766	NO	NO	NO	coding	2.05627
535	6978903..6979237	6979068	335	10.7204	4.08442e-27	415	inside	MXAN_RS27210	MXAN_5615	pilus assembly protein PilZ	6978653	6979594	NO	NO	NO	coding	2.04525
536	4624544..4624876	4624707	333	10.7133	4.40617e-27	513	outside	MXAN_RS18670	no in old annotation	site-specific tyrosine recombinase XerD	4624194	4623262	NO	NO	NO	coding	2.23649
537	2428582..2428962	2428752	381	10.5527	2.4691e-26	464	outside	MXAN_RS10165	MXAN_2096	DUF2169 domain-containing protein	2429216	2430241	NO	NO	NO	coding	2.15815
538	594376..594740	594546	365	10.5404	2.81365e-26	211	outside	MXAN_RS02545	MXAN_0526	hypothetical protein	594757	595827	NO	NO	NO	coding	2.02748
539	3179525..3180031	3179695	507	10.5194	3.51723e-26	239	outside	MXAN_RS13215	MXAN_2728	2Fe-2S iron-sulfur cluster binding domain-containing protein	3179456	3177576	NO	NO	NO	coding	2.02478
540	224378..224700	224533	323	10.4576	6.75854e-26	126	outside	MXAN_RS00910	MXAN_0184	hypothetical protein	224407	223688	NO	NO	NO	coding	2.07231
541	2724083..2724538	2724253	456	10.293	3.78752e-25	268	outside	MXAN_RS11325	MXAN_2344	hypothetical protein	2723985	2722891	NO	NO	NO	coding	2.07121
542	4569239..4569630	4569409	392	10.2891	3.94382e-25	116	outside	MXAN_RS18450	MXAN_3803	iron-sulfur cluster carrier protein ApbC	4569293	4568208	NO	NO	NO	intergenic	2.08269
543	6310382..6310683	6310530	302	10.2557	5.57763e-25	231	inside	MXAN_RS24505	MXAN_5044	cell wall surface anchor family protein	6310299	6311018	NO	NO	NO	coding	2.01968
544	4616257..4616613	4616426	357	10.1963	1.02976e-24	39	outside	MXAN_RS18640	MXAN_3838	PBS lyase	4616387	4614267	NO	NO	NO	intergenic	2.02438
545	1646461..1646812	1646643	352	10.1516	1.62931e-24	109	outside	MXAN_RS06775	MXAN_1397	HEAT repeat domain-containing protein	1646534	1644939	NO	NO	NO	coding	2.04614
546	4843495..4843849	4843665	355	10.1395	1.8443e-24	278	outside	MXAN_RS19340	MXAN_3978	acyl-CoA dehydrogenase	4843943	4845604	NO	NO	NO	coding	2.13484
547	2989655..2990004	2989825	350	10.0319	5.51595e-24	95	outside	MXAN_RS12425	no in old annotation	acetate--CoA ligase	2989920	2991896	NO	NO	NO	coding	2.34183
548	2675443..2675786	2675618	344	10.0107	6.83678e-24	533	inside	MXAN_RS11120	MXAN_2301	hypothetical protein	2676151	2675174	YES	YES	NO	coding	2.08194
549	161008..161364	161195	357	9.98903	8.51194e-24	583	outside	MXAN_RS00675	MXAN_0137	hypothetical protein	160612	159737	YES	NO	NO	coding	2.01792
550	4238971..4239476	4239307	506	9.96902	1.04137e-23	27	inside	MXAN_RS17555	MXAN_3620	type I polyketide synthase	4239280	4243803	NO	NO	NO	coding	2.23502
551	2727249..2727572	2727408	324	9.92966	1.5465e-23	123	outside	MXAN_RS11345	MXAN_2349	phosphoribosylformylglycinamidine synthase	2727531	2731439	NO	NO	NO	intergenic	2.24286
552	3244086..3244508	3244339	423	9.90942	1.89412e-23	482	outside	MXAN_RS13510	MXAN_2788	Rieske (2Fe-2S) protein	3244821	3245201	NO	NO	NO	coding	2.1822
553	4019644..4019981	4019813	338	9.87071	2.78851e-23	53	outside	MXAN_RS16735	no in old annotation	excinuclease ABC subunit A	4019866	4022418	YES	NO	NO	intergenic	2.14109
554	6435786..6436204	6436035	419	9.53205	7.7107e-22	87	outside	MXAN_RS25030	MXAN_5151	chemotaxis protein CheW	6435948	6435511	YES	YES	YES	coding	2.05504
555	4193904..4194313	4194148	410	9.50654	9.85515e-22	1126	inside	MXAN_RS17455	MXAN_3598	DNA cytosine methyltransferase	4195274	4193685	YES	YES	NO	coding	2.05377
556	5141418..5141766	5141597	349	9.5055	9.95492e-22	44	outside	MXAN_RS20325	MXAN_4186	hypothetical protein	5141553	5140882	NO	NO	NO	coding	2.00899
557	4670587..4670924	4670760	338	9.35201	4.29985e-21	256	outside	MXAN_RS18875	MXAN_3885	SCPU domain-containing protein	4670504	4669947	YES	YES	YES	intergenic	2.79727
558	4266943..4267307	4267113	365	9.23663	1.27192e-20	20	inside	MXAN_RS17625	MXAN_3634	non-ribosomal peptide synthetase	4267093	4284318	YES	NO	NO	coding	2.3114
559	7625123..7625501	7625332	379	9.20313	1.73831e-20	29	outside	MXAN_RS29900	MXAN_6166	pyridoxal-phosphate dependent enzyme	7625303	7624383	YES	NO	NO	intergenic	2.5221
560	2926011..2926365	2926176	355	9.062	6.4041e-20	439	inside	MXAN_RS12145	MXAN_2515	general secretion pathway protein GspC	2926615	2925671	NO	NO	NO	coding	2.07204
561	751201..751583	751371	383	8.99665	1.16359e-19	137	outside	MXAN_RS03155	MXAN_0652	hypothetical protein	751234	750449	YES	NO	NO	coding	2.06711
562	3349674..3350052	3349887	379	8.9851	1.29251e-19	23	outside	MXAN_RS13910	MXAN_2872	NAD(P)/FAD-dependent oxidoreductase	3349910	3351679	YES	NO	NO	intergenic	2.06774
563	3649927..3650287	3650119	361	8.87936	3.36241e-19	13	outside	MXAN_RS15080	MXAN_3111	hypothetical protein	3650106	3648892	NO	NO	NO	intergenic	2.03797
564	1500019..1500419	1500188	401	8.81058	6.22525e-19	70	outside	MXAN_RS06195	MXAN_1283	isocitrate/isopropylmalate dehydrogenase family protein	1500118	1499048	YES	YES	YES	intergenic	2.67377
565	3727946..3728288	3728116	343	8.75524	1.01834e-18	78	outside	MXAN_RS36795	MXAN_3181	DUF2381 family protein	3728194	3729057	YES	YES	NO	intergenic	2.22913
566	2596096..2596453	2596266	358	8.64386	2.71731e-18	1248	outside	MXAN_RS10860	MXAN_2248	hypothetical protein	2597514	2598668	YES	YES	NO	coding	2.31079
567	8208670..8209122	8208953	453	8.44648	1.50109e-17	6493	outside	MXAN_RS32320	MXAN_6674	hypothetical protein	8202460	8204520	NO	NO	NO	coding	2.03302
568	3809375..3809799	3809633	425	7.35558	9.50505e-14	104	inside	MXAN_RS15770	MXAN_3256	transcriptional regulator	3809737	3809024	NO	NO	NO	coding	2.01073
569	5543830..5544289	5543988	460	4.0646	2.40572e-05	1010	outside	MXAN_RS21745	no in old annotation	hypothetical protein	5544998	5544528	YES	YES	YES	coding	2.26303
